# Supplementary material for: A Genome-Wide Detection of Copy Number Variations Using SNP Genotyping Arrays in Braque Français Type Pyrénées Dogs
Source: Animals (Basel). 2019 Mar 1;9(3):77. doi: 10.3390/ani9030077 (PMC6466271; doi:10.3390/ani9030077)
Supplement: Supplementary file 1 [file animals-09-00077-s001.xlsx]

## Sheet: CNVs_Penn
CNVs	Chr	Start Position	End Position	SNP	Length	State	ID	Start Marker	End Marker
chr1:4534732-4636070	1	4534732	4636070	numsnp=8	101339	state5,cn=3	BF.split28	BICF2P1444153	BICF2P429986
chr1:10163967-10198323	1	10163967	10198323	numsnp=3	34357	state2,cn=1	BF.split4 s	BICF2G630711520	BICF2P1458857
chr1:10163967-10604319	1	10163967	10604319	numsnp=30	440353	state2,cn=1	BF.split46	BICF2G630711520	TIGRP2P8195_rs9235469
chr1:10255636-10271503	1	10255636	10271503	numsnp=3	15868	state2,cn=1	BF.split37	BICF2G630711562	BICF2G630711577
chr1:10444637-10604319	1	10444637	10604319	numsnp=11	159683	state2,cn=1	BF.split15	BICF2P1328116	TIGRP2P8195_rs9235469
chr1:10444637-10604319	1	10444637	10604319	numsnp=11	159683	state2,cn=1	BF.split39	BICF2P1328116	TIGRP2P8195_rs9235469
chr1:10516483-10604319	1	10516483	10604319	numsnp=8	87837	state2,cn=1	BF.split37	TIGRP2P8158_rs8551476	TIGRP2P8195_rs9235469
chr1:10858310-10961544	1	10858310	10961544	numsnp=8	103235	state2,cn=1	BF.split39	BICF2P1310182	BICF2P777234
chr1:11019380-11119991	1	11019380	11119991	numsnp=10	100612	state2,cn=1	BF.split35	TIGRP2P8261_rs8668370	BICF2P629544
chr1:11019380-11215077	1	11019380	11215077	numsnp=19	195698	state2,cn=1	BF.split34	TIGRP2P8261_rs8668370	BICF2P355794
chr1:11019380-11215077	1	11019380	11215077	numsnp=19	195698	state2,cn=1	BF.split44	TIGRP2P8261_rs8668370	BICF2P355794
chr1:11030313-11074423	1	11030313	11074423	numsnp=5	44111	state2,cn=1	BF.split39	TIGRP2P8264_rs8489051	BICF2S23653590
chr1:11030313-11167874	1	11030313	11167874	numsnp=14	137562	state2,cn=1	BF.split19	TIGRP2P8264_rs8489051	BICF2P1082367
chr1:11030313-11167874	1	11030313	11167874	numsnp=14	137562	state2,cn=1	BF.split37	TIGRP2P8264_rs8489051	BICF2P1082367
chr1:11040857-11074423	1	11040857	11074423	numsnp=4	33567	state2,cn=1	BF.split16	TIGRP2P8274_rs8903227	BICF2S23653590
chr1:11040857-11230533	1	11040857	11230533	numsnp=18	189677	state2,cn=1	BF.split43	TIGRP2P8274_rs8903227	BICF2P836101
chr1:11155024-11167874	1	11155024	11167874	numsnp=3	12851	state2,cn=1	BF.split28	BICF2S23322680	BICF2P1082367
chr1:11230533-11262018	1	11230533	11262018	numsnp=4	31486	state5,cn=3	BF.split44	BICF2P836101	BICF2P804546
chr1:11623152-11641176	1	11623152	11641176	numsnp=3	18025	state2,cn=1	BF.split16	BICF2P507250	BICF2P722535
chr1:11623152-11730119	1	11623152	11730119	numsnp=10	106968	state2,cn=1	BF.split34	BICF2P507250	BICF2P779428
chr1:11623152-11799809	1	11623152	11799809	numsnp=17	176658	state2,cn=1	BF.split40	BICF2P507250	BICF2S2357622
chr1:11641176-11744340	1	11641176	11744340	numsnp=9	103165	state2,cn=1	BF.split27	BICF2P722535	BICF2P1135866
chr1:11679629-11730119	1	11679629	11730119	numsnp=6	50491	state5,cn=3	BF.split45	BICF2P6662	BICF2P779428
chr1:11689281-11744340	1	11689281	11744340	numsnp=6	55060	state2,cn=1	BF.split18	TIGRP2P8484_rs9021101	BICF2P1135866
chr1:11689281-11744340	1	11689281	11744340	numsnp=6	55060	state2,cn=1	BF.split9 s	TIGRP2P8484_rs9021101	BICF2P1135866
chr1:11702682-11721611	1	11702682	11721611	numsnp=3	18930	state1,cn=0	BF.split41	BICF2P1438973	BICF2P470094
chr1:11721611-11986934	1	11721611	11986934	numsnp=24	265324	state2,cn=1	BF.split15	BICF2P470094	BICF2P1378726
chr1:11759885-11799809	1	11759885	11799809	numsnp=6	39925	state5,cn=3	BF.split18	BICF2P576377	BICF2S2357622
chr1:11759885-11822623	1	11759885	11822623	numsnp=8	62739	state5,cn=3	BF.split34	BICF2P576377	BICF2P889790
chr1:11903839-11986934	1	11903839	11986934	numsnp=7	83096	state2,cn=1	BF.split33	BICF2S2312304	BICF2P1378726
chr1:11903839-11986934	1	11903839	11986934	numsnp=7	83096	state2,cn=1	BF.split43	BICF2S2312304	BICF2P1378726
chr1:11903839-12118943	1	11903839	12118943	numsnp=17	215105	state2,cn=1	BF.split27	BICF2S2312304	BICF2S23331108
chr1:11903839-12629269	1	11903839	12629269	numsnp=56	725431	state2,cn=1	BF.split34	BICF2S2312304	BICF2P135973
chr1:12046335-12089620	1	12046335	12089620	numsnp=5	43286	state2,cn=1	BF.split4 s	BICF2P107320	BICF2P303826
chr1:12089620-12216586	1	12089620	12216586	numsnp=11	126967	state5,cn=3	BF.split35	BICF2P303826	BICF2P1389306
chr1:12101184-12191961	1	12101184	12191961	numsnp=8	90778	state5,cn=3	BF.split4 s	TIGRP2P8633_rs8991340	TIGRP2P15342_rs9127984
chr1:12144103-12191961	1	12144103	12191961	numsnp=5	47859	state6,cn=4	BF.split24	BICF2P1162632	TIGRP2P15342_rs9127984
chr1:12144103-12203650	1	12144103	12203650	numsnp=6	59548	state5,cn=3	BF.split44	BICF2P1162632	TIGRP2P15350_rs9095193
chr1:12171761-12191961	1	12171761	12191961	numsnp=3	20201	state5,cn=3	BF.split37	BICF2P1256027	TIGRP2P15342_rs9127984
chr1:12284259-12470251	1	12284259	12470251	numsnp=17	185993	state2,cn=1	BF.split33	BICF2P1436781	BICF2P296037
chr1:12345078-12452013	1	12345078	12452013	numsnp=11	106936	state2,cn=1	BF.split4 s	BICF2P436154	BICF2P527838
chr1:12389917-12481044	1	12389917	12481044	numsnp=10	91128	state2,cn=1	BF.split43	BICF2P221867	TIGRP2P15516_rs8651231
chr1:12395859-12452013	1	12395859	12452013	numsnp=6	56155	state2,cn=1	BF.split28	BICF2P682714	BICF2P527838
chr1:12395859-12452013	1	12395859	12452013	numsnp=6	56155	state2,cn=1	BF.split39	BICF2P682714	BICF2P527838
chr1:12418403-12452013	1	12418403	12452013	numsnp=4	33611	state2,cn=1	BF.split16	TIGRP2P15489_rs9216368	BICF2P527838
chr1:12552682-12716054	1	12552682	12716054	numsnp=10	163373	state2,cn=1	BF.split40	BICF2P144870	BICF2S2374262
chr1:12559709-12592574	1	12559709	12592574	numsnp=4	32866	state2,cn=1	BF.split27	BICF2P374057	BICF2P532976
chr1:56163851-56235164	1	56163851	56235164	numsnp=6	71314	state5,cn=3	BF.split27	BICF2P258221	BICF2S2446709
chr1:69104737-69177941	1	69104737	69177941	numsnp=8	73205	state2,cn=1	BF.split28	BICF2P111584	BICF2S2317062
chr1:69133159-69177941	1	69133159	69177941	numsnp=5	44783	state2,cn=1	BF.split18	BICF2P551161	BICF2S2317062
chr1:69133159-69177941	1	69133159	69177941	numsnp=5	44783	state2,cn=1	BF.split23	BICF2P551161	BICF2S2317062
chr1:74982550-75042990	1	74982550	75042990	numsnp=5	60441	state5,cn=3	BF.split43	BICF2P1367665	BICF2P226653
chr1:111771896-111870787	1	111771896	111870787	numsnp=6	98892	state5,cn=3	BF.split46	BICF2P642344	BICF2P1257349
chr1:111780929-111939159	1	111780929	111939159	numsnp=8	158231	state5,cn=3	BF.split44	BICF2S23440529	BICF2S2299529
chr1:111787188-111870787	1	111787188	111870787	numsnp=4	83600	state5,cn=3	BF.split16	BICF2P1185657	BICF2P1257349
chr1:111787188-111870787	1	111787188	111870787	numsnp=4	83600	state5,cn=3	BF.split17	BICF2P1185657	BICF2P1257349
chr1:111787188-111870787	1	111787188	111870787	numsnp=4	83600	state5,cn=3	BF.split19	BICF2P1185657	BICF2P1257349
chr1:111787188-111870787	1	111787188	111870787	numsnp=4	83600	state5,cn=3	BF.split21	BICF2P1185657	BICF2P1257349
chr1:111787188-111870787	1	111787188	111870787	numsnp=4	83600	state5,cn=3	BF.split27	BICF2P1185657	BICF2P1257349
chr1:111787188-111870787	1	111787188	111870787	numsnp=4	83600	state5,cn=3	BF.split33	BICF2P1185657	BICF2P1257349
chr1:111787188-111870787	1	111787188	111870787	numsnp=4	83600	state5,cn=3	BF.split34	BICF2P1185657	BICF2P1257349
chr1:111787188-111870787	1	111787188	111870787	numsnp=4	83600	state5,cn=3	BF.split39	BICF2P1185657	BICF2P1257349
chr1:111787188-111870787	1	111787188	111870787	numsnp=4	83600	state5,cn=3	BF.split40	BICF2P1185657	BICF2P1257349
chr1:111787188-111870787	1	111787188	111870787	numsnp=4	83600	state5,cn=3	BF.split45	BICF2P1185657	BICF2P1257349
chr1:120402077-120471590	1	120402077	120471590	numsnp=8	69514	state2,cn=1	BF.split2 s	BICF2P663855	BICF2P885835
chr1:121700084-121785177	1	121700084	121785177	numsnp=5	85094	state2,cn=1	BF.split19	BICF2P1272006	BICF2P15282
chr1:121700084-121785177	1	121700084	121785177	numsnp=5	85094	state2,cn=1	BF.split44	BICF2P1272006	BICF2P15282
chr2:11900062-11946899	2	11900062	11946899	numsnp=6	46838	state2,cn=1	BF.split15	BICF2P187658	BICF2G630674669
chr2:30386155-30445145	2	30386155	30445145	numsnp=7	58991	state2,cn=1	BF.split43	BICF2P1149950	BICF2P500895
chr2:56131843-56190558	2	56131843	56190558	numsnp=6	58716	state2,cn=1	BF.split44	BICF2P1034807	BICF2P663187
chr2:84953251-85062551	2	84953251	85062551	numsnp=9	109301	state2,cn=1	BF.split21	TIGRP2P36259_rs8655107	BICF2S23645363
chr2:85014043-85056737	2	85014043	85056737	numsnp=4	42695	state2,cn=1	BF.split40	BICF2P619735	BICF2P100322
chr2:85014043-85062551	2	85014043	85062551	numsnp=5	48509	state2,cn=1	BF.split15	BICF2P619735	BICF2S23645363
chr2:85014043-85062551	2	85014043	85062551	numsnp=5	48509	state2,cn=1	BF.split16	BICF2P619735	BICF2S23645363
chr2:85014043-85062551	2	85014043	85062551	numsnp=5	48509	state2,cn=1	BF.split18	BICF2P619735	BICF2S23645363
chr2:85014043-85062551	2	85014043	85062551	numsnp=5	48509	state2,cn=1	BF.split23	BICF2P619735	BICF2S23645363
chr2:85014043-85062551	2	85014043	85062551	numsnp=5	48509	state2,cn=1	BF.split41	BICF2P619735	BICF2S23645363
chr2:85035212-85056737	2	85035212	85056737	numsnp=3	21526	state2,cn=1	BF.split17	G211f4S162	BICF2P100322
chr2:85035212-85056737	2	85035212	85056737	numsnp=3	21526	state2,cn=1	BF.split27	G211f4S162	BICF2P100322
chr2:85035212-85062551	2	85035212	85062551	numsnp=4	27340	state2,cn=1	BF.split19	G211f4S162	BICF2S23645363
chr2:85035212-85062551	2	85035212	85062551	numsnp=4	27340	state2,cn=1	BF.split2 s	G211f4S162	BICF2S23645363
chr2:85035212-85062551	2	85035212	85062551	numsnp=4	27340	state2,cn=1	BF.split26	G211f4S162	BICF2S23645363
chr2:85035212-85062551	2	85035212	85062551	numsnp=4	27340	state2,cn=1	BF.split28	G211f4S162	BICF2S23645363
chr2:85035212-85062551	2	85035212	85062551	numsnp=4	27340	state2,cn=1	BF.split34	G211f4S162	BICF2S23645363
chr2:85035212-85062551	2	85035212	85062551	numsnp=4	27340	state2,cn=1	BF.split39	G211f4S162	BICF2S23645363
chr2:85035212-85062551	2	85035212	85062551	numsnp=4	27340	state2,cn=1	BF.split44	G211f4S162	BICF2S23645363
chr2:85035212-85062551	2	85035212	85062551	numsnp=4	27340	state2,cn=1	BF.split46	G211f4S162	BICF2S23645363
chr2:85035212-85062551	2	85035212	85062551	numsnp=4	27340	state2,cn=1	BF.split9 s	G211f4S162	BICF2S23645363
chr3:3516768-3549040	3	3516768	3549040	numsnp=4	32273	state2,cn=1	BF.split37	BICF2P1182555	BICF2P158838
chr3:3516768-3549040	3	3516768	3549040	numsnp=4	32273	state2,cn=1	BF.split4 s	BICF2P1182555	BICF2P158838
chr3:5683627-5699333	3	5683627	5699333	numsnp=3	15707	state5,cn=3	BF.split28	BICF2P351298	BICF2P906317
chr3:7445042-7474046	3	7445042	7474046	numsnp=4	29005	state5,cn=3	BF.split2 s	BICF2S231822	BICF2P395505
chr3:7445042-7474046	3	7445042	7474046	numsnp=4	29005	state5,cn=3	BF.split34	BICF2S231822	BICF2P395505
chr3:62298910-62375531	3	62298910	62375531	numsnp=8	76622	state2,cn=1	BF.split9 s	BICF2P288807	BICF2P27635
chr3:91351759-91530812	3	91351759	91530812	numsnp=17	179054	state2,cn=1	BF.split19	BICF2G630361819	BICF2S23326367
chr3:91351759-91530812	3	91351759	91530812	numsnp=17	179054	state2,cn=1	BF.split26	BICF2G630361819	BICF2S23326367
chr3:91351759-91530812	3	91351759	91530812	numsnp=17	179054	state2,cn=1	BF.split39	BICF2G630361819	BICF2S23326367
chr3:91351759-91537776	3	91351759	91537776	numsnp=18	186018	state2,cn=1	BF.split44	BICF2G630361819	BICF2G630361929
chr3:91380000-91439381	3	91380000	91439381	numsnp=7	59382	state2,cn=1	BF.split16	BICF2P1456918	BICF2G630361892
chr3:91380000-91439381	3	91380000	91439381	numsnp=7	59382	state2,cn=1	BF.split18	BICF2P1456918	BICF2G630361892
chr3:91380000-91439381	3	91380000	91439381	numsnp=7	59382	state2,cn=1	BF.split40	BICF2P1456918	BICF2G630361892
chr3:91380000-91530812	3	91380000	91530812	numsnp=14	150813	state2,cn=1	BF.split17	BICF2P1456918	BICF2S23326367
chr3:91380000-91530812	3	91380000	91530812	numsnp=14	150813	state2,cn=1	BF.split27	BICF2P1456918	BICF2S23326367
chr3:91380000-91530812	3	91380000	91530812	numsnp=14	150813	state2,cn=1	BF.split28	BICF2P1456918	BICF2S23326367
chr3:91380000-91530812	3	91380000	91530812	numsnp=14	150813	state2,cn=1	BF.split9 s	BICF2P1456918	BICF2S23326367
chr3:91380000-91564719	3	91380000	91564719	numsnp=17	184720	state2,cn=1	BF.split15	BICF2P1456918	BICF2G630361953
chr3:91380000-91658105	3	91380000	91658105	numsnp=24	278106	state2,cn=1	BF.split21	BICF2P1456918	BICF2G630362025
chr3:91414544-91530812	3	91414544	91530812	numsnp=11	116269	state2,cn=1	BF.split43	BICF2P124515	BICF2S23326367
chr3:91414544-91530812	3	91414544	91530812	numsnp=11	116269	state2,cn=1	BF.split46	BICF2P124515	BICF2S23326367
chr3:91489218-91530812	3	91489218	91530812	numsnp=4	41595	state2,cn=1	BF.split2 s	BICF2P1240644	BICF2S23326367
chr4:21384431-21405516	4	21384431	21405516	numsnp=3	21086	state5,cn=3	BF.split35	BICF2P224931	BICF2P644497
chr4:28450015-28491246	4	28450015	28491246	numsnp=4	41232	state5,cn=3	BF.split35	BICF2P567086	BICF2S23134300
chr4:33916140-34050036	4	33916140	34050036	numsnp=10	133897	state2,cn=1	BF.split19	BICF2P872156	BICF2S22923389
chr4:33991898-34067769	4	33991898	34067769	numsnp=9	75872	state2,cn=1	BF.split15	BICF2P1323528	BICF2P453069
chr4:33991898-34067769	4	33991898	34067769	numsnp=9	75872	state2,cn=1	BF.split28	BICF2P1323528	BICF2P453069
chr4:33991898-34067769	4	33991898	34067769	numsnp=9	75872	state2,cn=1	BF.split37	BICF2P1323528	BICF2P453069
chr4:33991898-34067769	4	33991898	34067769	numsnp=9	75872	state2,cn=1	BF.split39	BICF2P1323528	BICF2P453069
chr4:34002878-34067769	4	34002878	34067769	numsnp=8	64892	state2,cn=1	BF.split41	BICF2S23617636	BICF2P453069
chr4:34326613-34400207	4	34326613	34400207	numsnp=7	73595	state2,cn=1	BF.split18	BICF2P1288379	BICF2P545755
chr4:34344727-34400207	4	34344727	34400207	numsnp=5	55481	state2,cn=1	BF.split15	BICF2P690253	BICF2P545755
chr4:34344727-34400207	4	34344727	34400207	numsnp=5	55481	state2,cn=1	BF.split19	BICF2P690253	BICF2P545755
chr4:34344727-34400207	4	34344727	34400207	numsnp=5	55481	state2,cn=1	BF.split41	BICF2P690253	BICF2P545755
chr4:34344727-34400207	4	34344727	34400207	numsnp=5	55481	state2,cn=1	BF.split9 s	BICF2P690253	BICF2P545755
chr4:34764154-34784049	4	34764154	34784049	numsnp=3	19896	state2,cn=1	BF.split4 s	BICF2P1062204	BICF2S23016646
chr4:34764154-34812697	4	34764154	34812697	numsnp=4	48544	state2,cn=1	BF.split44	BICF2P1062204	BICF2S2347794
chr4:34764154-34820893	4	34764154	34820893	numsnp=5	56740	state2,cn=1	BF.split16	BICF2P1062204	BICF2S23419768
chr4:34764154-34820893	4	34764154	34820893	numsnp=5	56740	state2,cn=1	BF.split17	BICF2P1062204	BICF2S23419768
chr4:34764154-34820893	4	34764154	34820893	numsnp=5	56740	state2,cn=1	BF.split18	BICF2P1062204	BICF2S23419768
chr4:34764154-34820893	4	34764154	34820893	numsnp=5	56740	state2,cn=1	BF.split21	BICF2P1062204	BICF2S23419768
chr4:34764154-34820893	4	34764154	34820893	numsnp=5	56740	state2,cn=1	BF.split9 s	BICF2P1062204	BICF2S23419768
chr4:34764154-34933935	4	34764154	34933935	numsnp=11	169782	state2,cn=1	BF.split26	BICF2P1062204	TIGRP2P60180_rs8540169
chr4:34764154-35015497	4	34764154	35015497	numsnp=17	251344	state2,cn=1	BF.split15	BICF2P1062204	BICF2S23624318
chr4:34764154-35015497	4	34764154	35015497	numsnp=17	251344	state2,cn=1	BF.split19	BICF2P1062204	BICF2S23624318
chr4:34764154-35015497	4	34764154	35015497	numsnp=17	251344	state2,cn=1	BF.split2 s	BICF2P1062204	BICF2S23624318
chr4:34764154-35015497	4	34764154	35015497	numsnp=17	251344	state2,cn=1	BF.split28	BICF2P1062204	BICF2S23624318
chr4:34764154-35015497	4	34764154	35015497	numsnp=17	251344	state2,cn=1	BF.split39	BICF2P1062204	BICF2S23624318
chr4:34764154-35029820	4	34764154	35029820	numsnp=18	265667	state2,cn=1	BF.split40	BICF2P1062204	BICF2S23040085
chr4:34885914-35029820	4	34885914	35029820	numsnp=10	143907	state2,cn=1	BF.split41	BICF2P1445008	BICF2S23040085
chr4:78344039-78369603	4	78344039	78369603	numsnp=4	25565	state5,cn=3	BF.split24	BICF2G630172849	BICF2G630172911
chr4:78344039-78369603	4	78344039	78369603	numsnp=4	25565	state5,cn=3	BF.split26	BICF2G630172849	BICF2G630172911
chr4:78344039-78369603	4	78344039	78369603	numsnp=4	25565	state5,cn=3	BF.split28	BICF2G630172849	BICF2G630172911
chr4:78344039-78369603	4	78344039	78369603	numsnp=4	25565	state5,cn=3	BF.split40	BICF2G630172849	BICF2G630172911
chr4:78344039-78369603	4	78344039	78369603	numsnp=4	25565	state5,cn=3	BF.split46	BICF2G630172849	BICF2G630172911
chr5:630921-765207	5	630921	765207	numsnp=9	134287	state2,cn=1	BF.split44	BICF2S23630240	TIGRP2P69205_rs8688773
chr5:630921-765207	5	630921	765207	numsnp=9	134287	state2,cn=1	BF.split9 s	BICF2S23630240	TIGRP2P69205_rs8688773
chr5:1243143-1290956	5	1243143	1290956	numsnp=4	47814	state2,cn=1	BF.split28	BICF2S23325646	BICF2S2397964
chr5:1243143-1290956	5	1243143	1290956	numsnp=4	47814	state2,cn=1	BF.split6 s	BICF2S23325646	BICF2S2397964
chr5:1243143-1315915	5	1243143	1315915	numsnp=6	72773	state2,cn=1	BF.split44	BICF2S23325646	BICF2S23127889
chr5:31087604-31171066	5	31087604	31171066	numsnp=7	83463	state5,cn=3	BF.split44	BICF2P47085	BICF2P328828
chr5:31095701-31171066	5	31095701	31171066	numsnp=6	75366	state5,cn=3	BF.split27	TIGRP2P70316_rs9232068	BICF2P328828
chr5:78316786-78460187	5	78316786	78460187	numsnp=10	143402	state5,cn=3	BF.split16	BICF2P477114	BICF2S23417295
chr5:78316786-78474993	5	78316786	78474993	numsnp=11	158208	state5,cn=3	BF.split45	BICF2P477114	BICF2P936230
chr5:78316786-78474993	5	78316786	78474993	numsnp=11	158208	state5,cn=3	BF.split46	BICF2P477114	BICF2P936230
chr5:78388663-78460187	5	78388663	78460187	numsnp=6	71525	state5,cn=3	BF.split2 s	BICF2S23618907	BICF2S23417295
chr5:78388663-78474993	5	78388663	78474993	numsnp=7	86331	state5,cn=3	BF.split18	BICF2S23618907	BICF2P936230
chr5:78388663-78474993	5	78388663	78474993	numsnp=7	86331	state5,cn=3	BF.split40	BICF2S23618907	BICF2P936230
chr6:38170856-38417042	6	38170856	38417042	numsnp=18	246187	state2,cn=1	BF.split9 s	BICF2P66878	BICF2P683078
chr6:38639216-38853551	6	38639216	38853551	numsnp=16	214336	state2,cn=1	BF.split19	BICF2S22929078	BICF2S23138729
chr6:38655424-38853551	6	38655424	38853551	numsnp=15	198128	state2,cn=1	BF.split15	BICF2P258497	BICF2S23138729
chr6:38655424-38853551	6	38655424	38853551	numsnp=15	198128	state2,cn=1	BF.split16	BICF2P258497	BICF2S23138729
chr6:38655424-38853551	6	38655424	38853551	numsnp=15	198128	state2,cn=1	BF.split17	BICF2P258497	BICF2S23138729
chr6:38655424-38853551	6	38655424	38853551	numsnp=15	198128	state2,cn=1	BF.split21	BICF2P258497	BICF2S23138729
chr6:38655424-38853551	6	38655424	38853551	numsnp=15	198128	state2,cn=1	BF.split23	BICF2P258497	BICF2S23138729
chr6:38655424-38853551	6	38655424	38853551	numsnp=15	198128	state2,cn=1	BF.split27	BICF2P258497	BICF2S23138729
chr6:38655424-38853551	6	38655424	38853551	numsnp=15	198128	state2,cn=1	BF.split40	BICF2P258497	BICF2S23138729
chr6:38655424-38853551	6	38655424	38853551	numsnp=15	198128	state2,cn=1	BF.split9 s	BICF2P258497	BICF2S23138729
chr6:39106048-39155866	6	39106048	39155866	numsnp=6	49819	state2,cn=1	BF.split19	BICF2S2297073	BICF2P774856
chr6:39106048-39155866	6	39106048	39155866	numsnp=6	49819	state2,cn=1	BF.split9 s	BICF2S2297073	BICF2P774856
chr6:39482383-39593648	6	39482383	39593648	numsnp=11	111266	state2,cn=1	BF.split27	TIGRP2P82574_rs8910870	BICF2P956852
chr6:39482383-39701191	6	39482383	39701191	numsnp=19	218809	state2,cn=1	BF.split17	TIGRP2P82574_rs8910870	BICF2P734463
chr6:39482383-39941098	6	39482383	39941098	numsnp=35	458716	state2,cn=1	BF.split19	TIGRP2P82574_rs8910870	BICF2S23232169
chr6:39482383-39941098	6	39482383	39941098	numsnp=35	458716	state2,cn=1	BF.split9 s	TIGRP2P82574_rs8910870	BICF2S23232169
chr6:39505091-39701191	6	39505091	39701191	numsnp=17	196101	state2,cn=1	BF.split23	BICF2P108376	BICF2P734463
chr6:40104594-40261501	6	40104594	40261501	numsnp=12	156908	state2,cn=1	BF.split19	TIGRP2P82667_rs8801624	BICF2S2364709
chr6:40104594-40261501	6	40104594	40261501	numsnp=12	156908	state2,cn=1	BF.split43	TIGRP2P82667_rs8801624	BICF2S2364709
chr6:40137436-40232810	6	40137436	40232810	numsnp=9	95375	state2,cn=1	BF.split26	BICF2P475423	TIGRP2P82676_rs8871439
chr6:40137436-40261501	6	40137436	40261501	numsnp=10	124066	state2,cn=1	BF.split15	BICF2P475423	BICF2S2364709
chr6:40137436-40261501	6	40137436	40261501	numsnp=10	124066	state2,cn=1	BF.split16	BICF2P475423	BICF2S2364709
chr6:40137436-40261501	6	40137436	40261501	numsnp=10	124066	state2,cn=1	BF.split40	BICF2P475423	BICF2S2364709
chr6:40143309-40232810	6	40143309	40232810	numsnp=8	89502	state2,cn=1	BF.split33	TIGRP2P82670_rs8601122	TIGRP2P82676_rs8871439
chr6:40198138-40232810	6	40198138	40232810	numsnp=4	34673	state2,cn=1	BF.split2 s	BICF2P544640	TIGRP2P82676_rs8871439
chr6:40198138-40261501	6	40198138	40261501	numsnp=5	63364	state2,cn=1	BF.split17	BICF2P544640	BICF2S2364709
chr6:40198138-40261501	6	40198138	40261501	numsnp=5	63364	state2,cn=1	BF.split18	BICF2P544640	BICF2S2364709
chr6:40198138-40261501	6	40198138	40261501	numsnp=5	63364	state2,cn=1	BF.split21	BICF2P544640	BICF2S2364709
chr6:40198138-40261501	6	40198138	40261501	numsnp=5	63364	state2,cn=1	BF.split23	BICF2P544640	BICF2S2364709
chr6:40198138-40261501	6	40198138	40261501	numsnp=5	63364	state2,cn=1	BF.split27	BICF2P544640	BICF2S2364709
chr6:40198138-40261501	6	40198138	40261501	numsnp=5	63364	state2,cn=1	BF.split46	BICF2P544640	BICF2S2364709
chr6:40198138-40261501	6	40198138	40261501	numsnp=5	63364	state2,cn=1	BF.split9 s	BICF2P544640	BICF2S2364709
chr7:32308-233188	7	32308	233188	numsnp=13	200881	state2,cn=1	BF.split18	BICF2G630465150	BICF2P474134
chr7:38374-158544	7	38374	158544	numsnp=9	120171	state2,cn=1	BF.split26	BICF2P357935	BICF2P1285992
chr7:38374-158544	7	38374	158544	numsnp=9	120171	state2,cn=1	BF.split4 s	BICF2P357935	BICF2P1285992
chr7:38374-180153	7	38374	180153	numsnp=10	141780	state2,cn=1	BF.split27	BICF2P357935	G425f48S249
chr7:55444-233188	7	55444	233188	numsnp=11	177745	state2,cn=1	BF.split16	BICF2G630465156	BICF2P474134
chr7:55444-233188	7	55444	233188	numsnp=11	177745	state2,cn=1	BF.split23	BICF2G630465156	BICF2P474134
chr7:448697-471323	7	448697	471323	numsnp=3	22627	state2,cn=1	BF.split28	BICF2P1290428	BICF2S23528456
chr7:448697-499211	7	448697	499211	numsnp=5	50515	state2,cn=1	BF.split34	BICF2P1290428	BICF2P1288503
chr7:448697-499211	7	448697	499211	numsnp=5	50515	state2,cn=1	BF.split39	BICF2P1290428	BICF2P1288503
chr7:463665-499211	7	463665	499211	numsnp=4	35547	state2,cn=1	BF.split4 s	BICF2P160506	BICF2P1288503
chr7:733453-836217	7	733453	836217	numsnp=10	102765	state2,cn=1	BF.split18	BICF2P1424453	BICF2P607865
chr7:733453-836217	7	733453	836217	numsnp=10	102765	state2,cn=1	BF.split21	BICF2P1424453	BICF2P607865
chr7:733453-836217	7	733453	836217	numsnp=10	102765	state2,cn=1	BF.split27	BICF2P1424453	BICF2P607865
chr7:733453-846445	7	733453	846445	numsnp=11	112993	state2,cn=1	BF.split39	BICF2P1424453	BICF2P142496
chr7:766926-846445	7	766926	846445	numsnp=8	79520	state2,cn=1	BF.split43	BICF2P390439	BICF2P142496
chr7:790325-836217	7	790325	836217	numsnp=5	45893	state2,cn=1	BF.split16	BICF2S23621822	BICF2P607865
chr7:790325-836217	7	790325	836217	numsnp=5	45893	state2,cn=1	BF.split23	BICF2S23621822	BICF2P607865
chr7:790325-836217	7	790325	836217	numsnp=5	45893	state2,cn=1	BF.split41	BICF2S23621822	BICF2P607865
chr7:790325-846445	7	790325	846445	numsnp=6	56121	state2,cn=1	BF.split34	BICF2S23621822	BICF2P142496
chr7:790325-961257	7	790325	961257	numsnp=16	170933	state2,cn=1	BF.split28	BICF2S23621822	BICF2P6113
chr7:810113-846445	7	810113	846445	numsnp=5	36333	state2,cn=1	BF.split24	BICF2P513937	BICF2P142496
chr7:810113-871741	7	810113	871741	numsnp=7	61629	state1,cn=0	BF.split9 s	BICF2P513937	BICF2P501390
chr7:813109-871741	7	813109	871741	numsnp=6	58633	state1,cn=0	BF.split19	BICF2P725417	BICF2P501390
chr7:813109-961257	7	813109	961257	numsnp=14	148149	state2,cn=1	BF.split44	BICF2P725417	BICF2P6113
chr7:831328-871741	7	831328	871741	numsnp=5	40414	state1,cn=0	BF.split17	BICF2P307336	BICF2P501390
chr7:846445-871741	7	846445	871741	numsnp=3	25297	state1,cn=0	BF.split27	BICF2P142496	BICF2P501390
chr7:846445-871741	7	846445	871741	numsnp=3	25297	state1,cn=0	BF.split41	BICF2P142496	BICF2P501390
chr7:846445-880668	7	846445	880668	numsnp=4	34224	state1,cn=0	BF.split16	BICF2P142496	BICF2P1379330
chr7:846445-880668	7	846445	880668	numsnp=4	34224	state1,cn=0	BF.split18	BICF2P142496	BICF2P1379330
chr7:846445-880668	7	846445	880668	numsnp=4	34224	state1,cn=0	BF.split21	BICF2P142496	BICF2P1379330
chr7:846445-880668	7	846445	880668	numsnp=4	34224	state1,cn=0	BF.split23	BICF2P142496	BICF2P1379330
chr7:893043-961257	7	893043	961257	numsnp=7	68215	state2,cn=1	BF.split16	BICF2P583714	BICF2P6113
chr7:893043-961257	7	893043	961257	numsnp=7	68215	state2,cn=1	BF.split18	BICF2P583714	BICF2P6113
chr7:893043-961257	7	893043	961257	numsnp=7	68215	state2,cn=1	BF.split23	BICF2P583714	BICF2P6113
chr7:1619223-1664084	7	1619223	1664084	numsnp=4	44862	state2,cn=1	BF.split16	BICF2P648367	BICF2G630465277
chr7:1619223-1664084	7	1619223	1664084	numsnp=4	44862	state2,cn=1	BF.split18	BICF2P648367	BICF2G630465277
chr7:1619223-1664084	7	1619223	1664084	numsnp=4	44862	state2,cn=1	BF.split23	BICF2P648367	BICF2G630465277
chr7:1619223-1664084	7	1619223	1664084	numsnp=4	44862	state2,cn=1	BF.split4 s	BICF2P648367	BICF2G630465277
chr7:63442303-63479235	7	63442303	63479235	numsnp=4	36933	state5,cn=3	BF.split19	BICF2G630565389	BICF2P881101
chr7:63442303-63479235	7	63442303	63479235	numsnp=4	36933	state5,cn=3	BF.split23	BICF2G630565389	BICF2P881101
chr7:63442303-63479235	7	63442303	63479235	numsnp=4	36933	state5,cn=3	BF.split43	BICF2G630565389	BICF2P881101
chr7:76709392-76782725	7	76709392	76782725	numsnp=7	73334	state5,cn=3	BF.split37	TIGRP2P104835_rs8608374	TIGRP2P104850_rs8997684
chr7:76709392-76782725	7	76709392	76782725	numsnp=7	73334	state5,cn=3	BF.split45	TIGRP2P104835_rs8608374	TIGRP2P104850_rs8997684
chr8:9674403-9697629	8	9674403	9697629	numsnp=3	23227	state2,cn=1	BF.split17	TIGRP2P107179_rs9064017	BICF2S23217239
chr8:20088992-20124883	8	20088992	20124883	numsnp=4	35892	state5,cn=3	BF.split41	TIGRP2P109228_rs9024690	BICF2P648139
chr8:20866932-20989649	8	20866932	20989649	numsnp=9	122718	state2,cn=1	BF.split46	TIGRP2P109520_rs9156181	TIGRP2P109561_rs9163923
chr8:39826564-39894805	8	39826564	39894805	numsnp=7	68242	state5,cn=3	BF.split28	BICF2P798242	BICF2P1144442
chr8:39848047-39894805	8	39848047	39894805	numsnp=5	46759	state5,cn=3	BF.split24	TIGRP2P113591_rs9063248	BICF2P1144442
chr8:39848047-39894805	8	39848047	39894805	numsnp=5	46759	state5,cn=3	BF.split39	TIGRP2P113591_rs9063248	BICF2P1144442
chr8:39848047-39894805	8	39848047	39894805	numsnp=5	46759	state5,cn=3	BF.split44	TIGRP2P113591_rs9063248	BICF2P1144442
chr8:68452765-68470779	8	68452765	68470779	numsnp=4	18015	state2,cn=1	BF.split19	BICF2P1135323	BICF2P878905
chr8:68452765-68525250	8	68452765	68525250	numsnp=7	72486	state2,cn=1	BF.split33	BICF2P1135323	BICF2G630416643
chr8:71014960-71042964	8	71014960	71042964	numsnp=4	28005	state2,cn=1	BF.split6 s	BICF2S23749875	BICF2P768728
chr8:71755643-71827579	8	71755643	71827579	numsnp=6	71937	state2,cn=1	BF.split26	BICF2P1295293	BICF2P97077
chr8:71755643-71855000	8	71755643	71855000	numsnp=10	99358	state2,cn=1	BF.split4 s	BICF2P1295293	BICF2P5232
chr8:71755643-71855000	8	71755643	71855000	numsnp=10	99358	state2,cn=1	BF.split44	BICF2P1295293	BICF2P5232
chr8:72058803-72140485	8	72058803	72140485	numsnp=5	81683	state2,cn=1	BF.split27	BICF2S23015916	BICF2S23646350
chr8:72377381-72485257	8	72377381	72485257	numsnp=7	107877	state2,cn=1	BF.split17	BICF2P153141	BICF2P952924
chr8:72377381-72485257	8	72377381	72485257	numsnp=7	107877	state2,cn=1	BF.split26	BICF2P153141	BICF2P952924
chr8:72387237-72459439	8	72387237	72459439	numsnp=4	72203	state2,cn=1	BF.split44	BICF2S23733264	BICF2S2372725
chr8:72685585-72785186	8	72685585	72785186	numsnp=8	99602	state2,cn=1	BF.split9 s	BICF2P377773	BICF2P679112
chr8:73297170-73345310	8	73297170	73345310	numsnp=4	48141	state5,cn=3	BF.split33	G529f28S15	BICF2S23641088
chr8:73976428-74280399	8	73976428	74280399	numsnp=3	303972	state5,cn=3	BF.split37	BICF2S23660841	G534f8S218
chr9:3493-351734	9	3493	351734	numsnp=25	348242	state2,cn=1	BF.split18	BICF2P309837	TIGRP2P244817_rs8572936
chr9:3493-351734	9	3493	351734	numsnp=25	348242	state2,cn=1	BF.split9 s	BICF2P309837	TIGRP2P244817_rs8572936
chr9:615993-795784	9	615993	795784	numsnp=14	179792	state2,cn=1	BF.split28	BICF2P1272565	BICF2P1188322
chr9:615993-997748	9	615993	997748	numsnp=31	381756	state2,cn=1	BF.split18	BICF2P1272565	TIGRP2P244718_rs8924886
chr9:615993-1041353	9	615993	1041353	numsnp=34	425361	state2,cn=1	BF.split9 s	BICF2P1272565	BICF2P95254
chr9:660066-795784	9	660066	795784	numsnp=11	135719	state2,cn=1	BF.split40	BICF2S23232063	BICF2P1188322
chr9:660066-997748	9	660066	997748	numsnp=28	337683	state2,cn=1	BF.split21	BICF2S23232063	TIGRP2P244718_rs8924886
chr9:660066-997748	9	660066	997748	numsnp=28	337683	state2,cn=1	BF.split26	BICF2S23232063	TIGRP2P244718_rs8924886
chr9:884661-997748	9	884661	997748	numsnp=11	113088	state2,cn=1	BF.split28	BICF2P1206077	TIGRP2P244718_rs8924886
chr9:884661-997748	9	884661	997748	numsnp=11	113088	state2,cn=1	BF.split6 s	BICF2P1206077	TIGRP2P244718_rs8924886
chr9:916372-997748	9	916372	997748	numsnp=8	81377	state2,cn=1	BF.split16	BICF2P801989	TIGRP2P244718_rs8924886
chr9:916372-997748	9	916372	997748	numsnp=8	81377	state1,cn=0	BF.split19	BICF2P801989	TIGRP2P244718_rs8924886
chr9:916372-997748	9	916372	997748	numsnp=8	81377	state2,cn=1	BF.split33	BICF2P801989	TIGRP2P244718_rs8924886
chr9:916372-997748	9	916372	997748	numsnp=8	81377	state2,cn=1	BF.split46	BICF2P801989	TIGRP2P244718_rs8924886
chr9:916372-1041353	9	916372	1041353	numsnp=11	124982	state2,cn=1	BF.split41	BICF2P801989	BICF2P95254
chr9:935245-997748	9	935245	997748	numsnp=6	62504	state1,cn=0	BF.split15	BICF2P1036569	TIGRP2P244718_rs8924886
chr9:935245-997748	9	935245	997748	numsnp=6	62504	state1,cn=0	BF.split17	BICF2P1036569	TIGRP2P244718_rs8924886
chr9:935245-997748	9	935245	997748	numsnp=6	62504	state1,cn=0	BF.split23	BICF2P1036569	TIGRP2P244718_rs8924886
chr9:935245-997748	9	935245	997748	numsnp=6	62504	state1,cn=0	BF.split27	BICF2P1036569	TIGRP2P244718_rs8924886
chr9:935245-997748	9	935245	997748	numsnp=6	62504	state1,cn=0	BF.split40	BICF2P1036569	TIGRP2P244718_rs8924886
chr9:1374423-1446930	9	1374423	1446930	numsnp=4	72508	state2,cn=1	BF.split9 s	BICF2P184132	BICF2P744273
chr9:1646919-1737674	9	1646919	1737674	numsnp=7	90756	state2,cn=1	BF.split21	BICF2P1056783	BICF2P1214913
chr9:1669133-1844385	9	1669133	1844385	numsnp=12	175253	state2,cn=1	BF.split26	BICF2P1179388	BICF2P223820
chr9:1669133-2367743	9	1669133	2367743	numsnp=46	698611	state2,cn=1	BF.split9 s	BICF2P1179388	BICF2P1325828
chr9:5190984-5240555	9	5190984	5240555	numsnp=5	49572	state5,cn=3	BF.split16	BICF2S23113017	BICF2P1183309
chr9:5190984-5240555	9	5190984	5240555	numsnp=5	49572	state5,cn=3	BF.split18	BICF2S23113017	BICF2P1183309
chr9:9682977-9757226	9	9682977	9757226	numsnp=7	74250	state2,cn=1	BF.split6 s	BICF2P314583	BICF2P11418
chr9:16881553-16972542	9	16881553	16972542	numsnp=6	90990	state5,cn=3	BF.split2 s	BICF2G630827040	TIGRP2P242412_rs8507839
chr9:16881553-16972542	9	16881553	16972542	numsnp=6	90990	state5,cn=3	BF.split27	BICF2G630827040	TIGRP2P242412_rs8507839
chr9:16881553-16972542	9	16881553	16972542	numsnp=6	90990	state5,cn=3	BF.split35	BICF2G630827040	TIGRP2P242412_rs8507839
chr9:16881553-16972542	9	16881553	16972542	numsnp=6	90990	state5,cn=3	BF.split4 s	BICF2G630827040	TIGRP2P242412_rs8507839
chr9:16881553-16972542	9	16881553	16972542	numsnp=6	90990	state5,cn=3	BF.split40	BICF2G630827040	TIGRP2P242412_rs8507839
chr9:16881553-16972542	9	16881553	16972542	numsnp=6	90990	state5,cn=3	BF.split43	BICF2G630827040	TIGRP2P242412_rs8507839
chr9:16904377-16972542	9	16904377	16972542	numsnp=4	68166	state5,cn=3	BF.split16	BICF2G630826984	TIGRP2P242412_rs8507839
chr9:16904377-16972542	9	16904377	16972542	numsnp=4	68166	state5,cn=3	BF.split18	BICF2G630826984	TIGRP2P242412_rs8507839
chr9:16904377-16972542	9	16904377	16972542	numsnp=4	68166	state5,cn=3	BF.split19	BICF2G630826984	TIGRP2P242412_rs8507839
chr9:16904377-16972542	9	16904377	16972542	numsnp=4	68166	state5,cn=3	BF.split37	BICF2G630826984	TIGRP2P242412_rs8507839
chr9:16904377-16972542	9	16904377	16972542	numsnp=4	68166	state5,cn=3	BF.split44	BICF2G630826984	TIGRP2P242412_rs8507839
chr9:20671507-20686832	9	20671507	20686832	numsnp=3	15326	state5,cn=3	BF.split28	BICF2G630829567	BICF2P879969
chr9:30085482-30133270	9	30085482	30133270	numsnp=6	47789	state2,cn=1	BF.split40	BICF2G630834044	BICF2P352509
chr9:35785354-35920466	9	35785354	35920466	numsnp=8	135113	state2,cn=1	BF.split26	BICF2G630836811	BICF2G630836860
chr9:36220700-36391953	9	36220700	36391953	numsnp=14	171254	state2,cn=1	BF.split17	BICF2G630836945	BICF2G630837077
chr9:36229022-36308946	9	36229022	36308946	numsnp=6	79925	state2,cn=1	BF.split4 s	BICF2G630836951	BICF2G630836979
chr9:36229022-36326246	9	36229022	36326246	numsnp=7	97225	state2,cn=1	BF.split43	BICF2G630836951	BICF2G630836987
chr9:36229022-36333983	9	36229022	36333983	numsnp=8	104962	state2,cn=1	BF.split18	BICF2G630836951	BICF2G630836989
chr9:36229022-36333983	9	36229022	36333983	numsnp=8	104962	state2,cn=1	BF.split26	BICF2G630836951	BICF2G630836989
chr9:36229022-36333983	9	36229022	36333983	numsnp=8	104962	state2,cn=1	BF.split41	BICF2G630836951	BICF2G630836989
chr9:36229022-36333983	9	36229022	36333983	numsnp=8	104962	state2,cn=1	BF.split45	BICF2G630836951	BICF2G630836989
chr9:36229022-36333983	9	36229022	36333983	numsnp=8	104962	state2,cn=1	BF.split46	BICF2G630836951	BICF2G630836989
chr9:36229022-36391953	9	36229022	36391953	numsnp=13	162932	state2,cn=1	BF.split16	BICF2G630836951	BICF2G630837077
chr9:36229022-36391953	9	36229022	36391953	numsnp=13	162932	state2,cn=1	BF.split37	BICF2G630836951	BICF2G630837077
chr9:36229022-36391953	9	36229022	36391953	numsnp=13	162932	state2,cn=1	BF.split39	BICF2G630836951	BICF2G630837077
chr9:36229022-36391953	9	36229022	36391953	numsnp=13	162932	state2,cn=1	BF.split6 s	BICF2G630836951	BICF2G630837077
chr9:36288858-36333983	9	36288858	36333983	numsnp=5	45126	state2,cn=1	BF.split33	BICF2P28144	BICF2G630836989
chr9:36288858-36391953	9	36288858	36391953	numsnp=10	103096	state2,cn=1	BF.split15	BICF2P28144	BICF2G630837077
chr9:36288858-36391953	9	36288858	36391953	numsnp=10	103096	state2,cn=1	BF.split2 s	BICF2P28144	BICF2G630837077
chr9:36288858-36391953	9	36288858	36391953	numsnp=10	103096	state2,cn=1	BF.split24	BICF2P28144	BICF2G630837077
chr9:36288858-36391953	9	36288858	36391953	numsnp=10	103096	state2,cn=1	BF.split28	BICF2P28144	BICF2G630837077
chr9:36288858-36391953	9	36288858	36391953	numsnp=10	103096	state2,cn=1	BF.split35	BICF2P28144	BICF2G630837077
chr9:36288858-36391953	9	36288858	36391953	numsnp=10	103096	state2,cn=1	BF.split40	BICF2P28144	BICF2G630837077
chr9:36288858-36391953	9	36288858	36391953	numsnp=10	103096	state2,cn=1	BF.split44	BICF2P28144	BICF2G630837077
chr9:36288858-36444206	9	36288858	36444206	numsnp=11	155349	state2,cn=1	BF.split9 s	BICF2P28144	BICF2S23321769
chr9:36302228-36333983	9	36302228	36333983	numsnp=4	31756	state2,cn=1	BF.split21	BICF2G630836974	BICF2G630836989
chr9:36302228-36391953	9	36302228	36391953	numsnp=9	89726	state2,cn=1	BF.split27	BICF2G630836974	BICF2G630837077
chr10:16036838-16120048	10	16036838	16120048	numsnp=3	83211	state5,cn=3	BF.split21	TIGRP2P137714_rs8655628	TIGRP2P138053_rs8699336
chr10:16036838-16120048	10	16036838	16120048	numsnp=3	83211	state5,cn=3	BF.split24	TIGRP2P137714_rs8655628	TIGRP2P138053_rs8699336
chr10:16036838-16120048	10	16036838	16120048	numsnp=3	83211	state5,cn=3	BF.split33	TIGRP2P137714_rs8655628	TIGRP2P138053_rs8699336
chr10:16036838-16120048	10	16036838	16120048	numsnp=3	83211	state5,cn=3	BF.split35	TIGRP2P137714_rs8655628	TIGRP2P138053_rs8699336
chr10:16036838-16120048	10	16036838	16120048	numsnp=3	83211	state5,cn=3	BF.split43	TIGRP2P137714_rs8655628	TIGRP2P138053_rs8699336
chr10:16036838-16176400	10	16036838	16176400	numsnp=5	139563	state5,cn=3	BF.split16	TIGRP2P137714_rs8655628	BICF2P1506765
chr10:16036838-16176400	10	16036838	16176400	numsnp=5	139563	state5,cn=3	BF.split17	TIGRP2P137714_rs8655628	BICF2P1506765
chr10:16036838-16176400	10	16036838	16176400	numsnp=5	139563	state5,cn=3	BF.split18	TIGRP2P137714_rs8655628	BICF2P1506765
chr10:16036838-16176400	10	16036838	16176400	numsnp=5	139563	state5,cn=3	BF.split19	TIGRP2P137714_rs8655628	BICF2P1506765
chr10:16036838-16176400	10	16036838	16176400	numsnp=5	139563	state5,cn=3	BF.split23	TIGRP2P137714_rs8655628	BICF2P1506765
chr10:16036838-16176400	10	16036838	16176400	numsnp=5	139563	state5,cn=3	BF.split26	TIGRP2P137714_rs8655628	BICF2P1506765
chr10:16036838-16176400	10	16036838	16176400	numsnp=5	139563	state5,cn=3	BF.split4 s	TIGRP2P137714_rs8655628	BICF2P1506765
chr10:16036838-16176400	10	16036838	16176400	numsnp=5	139563	state5,cn=3	BF.split40	TIGRP2P137714_rs8655628	BICF2P1506765
chr10:16036838-16176400	10	16036838	16176400	numsnp=5	139563	state5,cn=3	BF.split44	TIGRP2P137714_rs8655628	BICF2P1506765
chr10:16036838-16176400	10	16036838	16176400	numsnp=5	139563	state5,cn=3	BF.split9 s	TIGRP2P137714_rs8655628	BICF2P1506765
chr10:16785414-16839727	10	16785414	16839727	numsnp=5	54314	state2,cn=1	BF.split28	BICF2P271043	TIGRP2P138791_rs8654162
chr10:16943758-17055639	10	16943758	17055639	numsnp=10	111882	state2,cn=1	BF.split17	BICF2P1204119	BICF2P804757
chr10:16943758-17055639	10	16943758	17055639	numsnp=10	111882	state2,cn=1	BF.split2 s	BICF2P1204119	BICF2P804757
chr10:16943758-17055639	10	16943758	17055639	numsnp=10	111882	state2,cn=1	BF.split4 s	BICF2P1204119	BICF2P804757
chr10:16943758-17084828	10	16943758	17084828	numsnp=11	141071	state2,cn=1	BF.split16	BICF2P1204119	BICF2G630476134
chr10:16943758-17084828	10	16943758	17084828	numsnp=11	141071	state2,cn=1	BF.split18	BICF2P1204119	BICF2G630476134
chr10:16943758-17084828	10	16943758	17084828	numsnp=11	141071	state2,cn=1	BF.split26	BICF2P1204119	BICF2G630476134
chr10:16943758-17084828	10	16943758	17084828	numsnp=11	141071	state2,cn=1	BF.split40	BICF2P1204119	BICF2G630476134
chr10:16943758-17084828	10	16943758	17084828	numsnp=11	141071	state2,cn=1	BF.split41	BICF2P1204119	BICF2G630476134
chr10:16943758-17084828	10	16943758	17084828	numsnp=11	141071	state2,cn=1	BF.split43	BICF2P1204119	BICF2G630476134
chr10:16943758-17164150	10	16943758	17164150	numsnp=17	220393	state2,cn=1	BF.split19	BICF2P1204119	BICF2P1405215
chr10:16943758-17193557	10	16943758	17193557	numsnp=19	249800	state2,cn=1	BF.split23	BICF2P1204119	G587f34S290
chr10:16943758-17213229	10	16943758	17213229	numsnp=20	269472	state2,cn=1	BF.split9 s	BICF2P1204119	BICF2G630476139
chr10:17164150-17193557	10	17164150	17193557	numsnp=3	29408	state2,cn=1	BF.split39	BICF2P1405215	G587f34S290
chr10:17172641-17284700	10	17172641	17284700	numsnp=5	112060	state1,cn=0	BF.split15	BICF2P647101	BICF2P376281
chr10:17172641-17284700	10	17172641	17284700	numsnp=5	112060	state1,cn=0	BF.split19	BICF2P647101	BICF2P376281
chr10:17172641-17284700	10	17172641	17284700	numsnp=5	112060	state1,cn=0	BF.split26	BICF2P647101	BICF2P376281
chr10:17172641-17284700	10	17172641	17284700	numsnp=5	112060	state1,cn=0	BF.split33	BICF2P647101	BICF2P376281
chr10:17172641-17284700	10	17172641	17284700	numsnp=5	112060	state1,cn=0	BF.split34	BICF2P647101	BICF2P376281
chr10:17172641-17284700	10	17172641	17284700	numsnp=5	112060	state1,cn=0	BF.split35	BICF2P647101	BICF2P376281
chr10:17172641-17284700	10	17172641	17284700	numsnp=5	112060	state1,cn=0	BF.split40	BICF2P647101	BICF2P376281
chr10:17172641-17284700	10	17172641	17284700	numsnp=5	112060	state1,cn=0	BF.split41	BICF2P647101	BICF2P376281
chr10:17172641-17284700	10	17172641	17284700	numsnp=5	112060	state1,cn=0	BF.split43	BICF2P647101	BICF2P376281
chr10:17172641-17284700	10	17172641	17284700	numsnp=5	112060	state1,cn=0	BF.split46	BICF2P647101	BICF2P376281
chr10:17213229-17284700	10	17213229	17284700	numsnp=3	71472	state1,cn=0	BF.split16	BICF2G630476139	BICF2P376281
chr10:17213229-17284700	10	17213229	17284700	numsnp=3	71472	state1,cn=0	BF.split18	BICF2G630476139	BICF2P376281
chr10:17213229-17284700	10	17213229	17284700	numsnp=3	71472	state1,cn=0	BF.split2 s	BICF2G630476139	BICF2P376281
chr10:17213229-17284700	10	17213229	17284700	numsnp=3	71472	state1,cn=0	BF.split21	BICF2G630476139	BICF2P376281
chr10:17213229-17284700	10	17213229	17284700	numsnp=3	71472	state1,cn=0	BF.split23	BICF2G630476139	BICF2P376281
chr10:17213229-17284700	10	17213229	17284700	numsnp=3	71472	state1,cn=0	BF.split27	BICF2G630476139	BICF2P376281
chr10:17213229-17284700	10	17213229	17284700	numsnp=3	71472	state1,cn=0	BF.split28	BICF2G630476139	BICF2P376281
chr10:17213229-17284700	10	17213229	17284700	numsnp=3	71472	state1,cn=0	BF.split39	BICF2G630476139	BICF2P376281
chr10:17213229-17284700	10	17213229	17284700	numsnp=3	71472	state1,cn=0	BF.split4 s	BICF2G630476139	BICF2P376281
chr10:17213229-17284700	10	17213229	17284700	numsnp=3	71472	state1,cn=0	BF.split44	BICF2G630476139	BICF2P376281
chr10:17213229-17284700	10	17213229	17284700	numsnp=3	71472	state1,cn=0	BF.split45	BICF2G630476139	BICF2P376281
chr10:17744636-17796981	10	17744636	17796981	numsnp=6	52346	state2,cn=1	BF.split9 s	BICF2G630476696	BICF2G630476786
chr10:17744636-17874056	10	17744636	17874056	numsnp=11	129421	state2,cn=1	BF.split41	BICF2G630476696	BICF2P145315
chr10:18086763-18220792	10	18086763	18220792	numsnp=12	134030	state2,cn=1	BF.split23	BICF2S22914679	BICF2G630477032
chr10:18100399-18162063	10	18100399	18162063	numsnp=6	61665	state2,cn=1	BF.split21	BICF2P212964	BICF2P949774
chr10:18100399-18220792	10	18100399	18220792	numsnp=11	120394	state2,cn=1	BF.split15	BICF2P212964	BICF2G630477032
chr10:18100399-18220792	10	18100399	18220792	numsnp=11	120394	state2,cn=1	BF.split26	BICF2P212964	BICF2G630477032
chr10:18100399-18220792	10	18100399	18220792	numsnp=11	120394	state2,cn=1	BF.split40	BICF2P212964	BICF2G630477032
chr10:18100399-18220792	10	18100399	18220792	numsnp=11	120394	state2,cn=1	BF.split41	BICF2P212964	BICF2G630477032
chr10:18100399-18236599	10	18100399	18236599	numsnp=12	136201	state2,cn=1	BF.split9 s	BICF2P212964	BICF2G630477053
chr10:18100399-18289425	10	18100399	18289425	numsnp=17	189027	state2,cn=1	BF.split19	BICF2P212964	BICF2P379354
chr10:18100399-18380169	10	18100399	18380169	numsnp=25	279771	state2,cn=1	BF.split43	BICF2P212964	BICF2P770135
chr10:18148326-18220792	10	18148326	18220792	numsnp=8	72467	state2,cn=1	BF.split27	BICF2G630477021	BICF2G630477032
chr10:18162063-18220792	10	18162063	18220792	numsnp=6	58730	state2,cn=1	BF.split2 s	BICF2P949774	BICF2G630477032
chr10:18180457-18220792	10	18180457	18220792	numsnp=5	40336	state1,cn=0	BF.split21	BICF2S22963358	BICF2G630477032
chr10:22893499-22917462	10	22893499	22917462	numsnp=3	23964	state1,cn=0	BF.split27	BICF2P458474	TIGRP2P138930_rs8593506
chr11:1170983-1188042	11	1170983	1188042	numsnp=3	17060	state2,cn=1	BF.split9 s	BICF2S23514671	BICF2S24116836
chr11:9806092-9895000	11	9806092	9895000	numsnp=7	88909	state5,cn=3	BF.split27	TIGRP2P145068_rs9144596	BICF2P1363201
chr11:9806092-9895000	11	9806092	9895000	numsnp=7	88909	state5,cn=3	BF.split34	TIGRP2P145068_rs9144596	BICF2P1363201
chr11:9806092-9895000	11	9806092	9895000	numsnp=7	88909	state5,cn=3	BF.split43	TIGRP2P145068_rs9144596	BICF2P1363201
chr11:30232008-30344709	11	30232008	30344709	numsnp=4	112702	state5,cn=3	BF.split39	BICF2P1194082	BICF2P1426297
chr11:30232008-30344709	11	30232008	30344709	numsnp=4	112702	state5,cn=3	BF.split43	BICF2P1194082	BICF2P1426297
chr11:47591006-47617053	11	47591006	47617053	numsnp=4	26048	state2,cn=1	BF.split26	BICF2P781699	BICF2P123144
chr12:186569-237954	12	186569	237954	numsnp=4	51386	state5,cn=3	BF.split43	TIGRP2P155079_rs8947362	BICF2P1065219
chr12:200611-237954	12	200611	237954	numsnp=3	37344	state5,cn=3	BF.split39	BICF2P949624	BICF2P1065219
chr12:33638523-33702526	12	33638523	33702526	numsnp=7	64004	state2,cn=1	BF.split33	BICF2P288800	BICF2S23453964
chr12:72024259-72268125	12	72024259	72268125	numsnp=18	243867	state2,cn=1	BF.split15	BICF2P64196	BICF2P402255
chr12:72024259-72268125	12	72024259	72268125	numsnp=18	243867	state2,cn=1	BF.split18	BICF2P64196	BICF2P402255
chr12:72024259-72268125	12	72024259	72268125	numsnp=18	243867	state2,cn=1	BF.split23	BICF2P64196	BICF2P402255
chr12:72024259-72268125	12	72024259	72268125	numsnp=18	243867	state2,cn=1	BF.split41	BICF2P64196	BICF2P402255
chr12:72024259-72268125	12	72024259	72268125	numsnp=18	243867	state2,cn=1	BF.split43	BICF2P64196	BICF2P402255
chr12:72045149-72150416	12	72045149	72150416	numsnp=7	105268	state2,cn=1	BF.split39	TIGRP2P173862_rs8727941	BICF2P140880
chr12:72045149-72268125	12	72045149	72268125	numsnp=17	222977	state2,cn=1	BF.split16	TIGRP2P173862_rs8727941	BICF2P402255
chr12:72045149-72268125	12	72045149	72268125	numsnp=17	222977	state2,cn=1	BF.split19	TIGRP2P173862_rs8727941	BICF2P402255
chr12:72045149-72268125	12	72045149	72268125	numsnp=17	222977	state2,cn=1	BF.split37	TIGRP2P173862_rs8727941	BICF2P402255
chr12:72102592-72268125	12	72102592	72268125	numsnp=15	165534	state2,cn=1	BF.split21	BICF2P402982	BICF2P402255
chr12:72203553-72268125	12	72203553	72268125	numsnp=7	64573	state2,cn=1	BF.split40	TIGRP2P173937_rs8707885	BICF2P402255
chr12:72220132-72268125	12	72220132	72268125	numsnp=5	47994	state2,cn=1	BF.split9 s	BICF2P771442	BICF2P402255
chr12:72237583-72256766	12	72237583	72256766	numsnp=3	19184	state2,cn=1	BF.split2 s	BICF2P142225	BICF2P955701
chr12:72237583-72268125	12	72237583	72268125	numsnp=4	30543	state2,cn=1	BF.split17	BICF2P142225	BICF2P402255
chr12:72237583-72268125	12	72237583	72268125	numsnp=4	30543	state2,cn=1	BF.split24	BICF2P142225	BICF2P402255
chr12:72237583-72268125	12	72237583	72268125	numsnp=4	30543	state2,cn=1	BF.split27	BICF2P142225	BICF2P402255
chr12:72237583-72268125	12	72237583	72268125	numsnp=4	30543	state2,cn=1	BF.split28	BICF2P142225	BICF2P402255
chr12:72237583-72268125	12	72237583	72268125	numsnp=4	30543	state2,cn=1	BF.split33	BICF2P142225	BICF2P402255
chr12:72237583-72268125	12	72237583	72268125	numsnp=4	30543	state2,cn=1	BF.split34	BICF2P142225	BICF2P402255
chr12:72237583-72268125	12	72237583	72268125	numsnp=4	30543	state2,cn=1	BF.split35	BICF2P142225	BICF2P402255
chr12:72237583-72268125	12	72237583	72268125	numsnp=4	30543	state2,cn=1	BF.split39	BICF2P142225	BICF2P402255
chr12:72237583-72268125	12	72237583	72268125	numsnp=4	30543	state2,cn=1	BF.split4 s	BICF2P142225	BICF2P402255
chr12:72237583-72268125	12	72237583	72268125	numsnp=4	30543	state2,cn=1	BF.split44	BICF2P142225	BICF2P402255
chr12:72237583-72268125	12	72237583	72268125	numsnp=4	30543	state2,cn=1	BF.split6 s	BICF2P142225	BICF2P402255
chr12:72243814-72268125	12	72243814	72268125	numsnp=3	24312	state1,cn=0	BF.split26	BICF2P393419	BICF2P402255
chr12:72460835-72491619	12	72460835	72491619	numsnp=4	30785	state5,cn=3	BF.split28	BICF2S22924927	TIGRP2P174000_rs8757648
chr12:72460835-72491619	12	72460835	72491619	numsnp=4	30785	state5,cn=3	BF.split44	BICF2S22924927	TIGRP2P174000_rs8757648
chr13:11172517-11374587	13	11172517	11374587	numsnp=20	202071	state2,cn=1	BF.split16	BICF2G630606982	BICF2G630607287
chr13:11172517-11374587	13	11172517	11374587	numsnp=20	202071	state2,cn=1	BF.split34	BICF2G630606982	BICF2G630607287
chr13:11172517-11374587	13	11172517	11374587	numsnp=20	202071	state1,cn=0	BF.split45	BICF2G630606982	BICF2G630607287
chr13:11172517-11374587	13	11172517	11374587	numsnp=20	202071	state2,cn=1	BF.split46	BICF2G630606982	BICF2G630607287
chr13:13143672-13181251	13	13143672	13181251	numsnp=5	37580	state5,cn=3	BF.split24	BICF2P1096460	BICF2G630608964
chr13:34438802-34477940	13	34438802	34477940	numsnp=6	39139	state5,cn=3	BF.split16	BICF2S22920419	BICF2G630660948
chr13:34485909-34531333	13	34485909	34531333	numsnp=4	45425	state2,cn=1	BF.split15	BICF2S23015593	BICF2G630660912
chr13:34485909-34531333	13	34485909	34531333	numsnp=4	45425	state2,cn=1	BF.split16	BICF2S23015593	BICF2G630660912
chr13:34485909-34531333	13	34485909	34531333	numsnp=4	45425	state2,cn=1	BF.split19	BICF2S23015593	BICF2G630660912
chr13:34485909-34531333	13	34485909	34531333	numsnp=4	45425	state2,cn=1	BF.split26	BICF2S23015593	BICF2G630660912
chr13:34485909-34531333	13	34485909	34531333	numsnp=4	45425	state2,cn=1	BF.split27	BICF2S23015593	BICF2G630660912
chr13:34485909-34531333	13	34485909	34531333	numsnp=4	45425	state2,cn=1	BF.split4 s	BICF2S23015593	BICF2G630660912
chr13:34485909-34531333	13	34485909	34531333	numsnp=4	45425	state2,cn=1	BF.split40	BICF2S23015593	BICF2G630660912
chr13:34485909-34531333	13	34485909	34531333	numsnp=4	45425	state2,cn=1	BF.split41	BICF2S23015593	BICF2G630660912
chr13:34485909-34557202	13	34485909	34557202	numsnp=6	71294	state2,cn=1	BF.split43	BICF2S23015593	BICF2P509138
chr13:34485909-34587853	13	34485909	34587853	numsnp=9	101945	state2,cn=1	BF.split21	BICF2S23015593	BICF2P658244
chr13:34485909-34600005	13	34485909	34600005	numsnp=10	114097	state2,cn=1	BF.split17	BICF2S23015593	BICF2P280193
chr13:34485909-34600005	13	34485909	34600005	numsnp=10	114097	state2,cn=1	BF.split18	BICF2S23015593	BICF2P280193
chr13:34485909-34600005	13	34485909	34600005	numsnp=10	114097	state2,cn=1	BF.split23	BICF2S23015593	BICF2P280193
chr13:34485909-34600005	13	34485909	34600005	numsnp=10	114097	state2,cn=1	BF.split28	BICF2S23015593	BICF2P280193
chr13:34485909-34600005	13	34485909	34600005	numsnp=10	114097	state2,cn=1	BF.split39	BICF2S23015593	BICF2P280193
chr13:34485909-34600005	13	34485909	34600005	numsnp=10	114097	state2,cn=1	BF.split9 s	BICF2S23015593	BICF2P280193
chr13:34524686-34600005	13	34524686	34600005	numsnp=8	75320	state2,cn=1	BF.split6 s	BICF2P1417808	BICF2P280193
chr13:34547269-34600005	13	34547269	34600005	numsnp=6	52737	state1,cn=0	BF.split15	BICF2P165854	BICF2P280193
chr13:34547269-34600005	13	34547269	34600005	numsnp=6	52737	state1,cn=0	BF.split19	BICF2P165854	BICF2P280193
chr13:34547269-34600005	13	34547269	34600005	numsnp=6	52737	state1,cn=0	BF.split4 s	BICF2P165854	BICF2P280193
chr13:34574511-34600005	13	34574511	34600005	numsnp=4	25495	state1,cn=0	BF.split43	BICF2P670287	BICF2P280193
chr13:34578465-34600005	13	34578465	34600005	numsnp=3	21541	state2,cn=1	BF.split2 s	BICF2P980357	BICF2P280193
chr13:35973823-36115501	13	35973823	36115501	numsnp=15	141679	state2,cn=1	BF.split19	BICF2G630660137	BICF2P109838
chr13:36078894-36115501	13	36078894	36115501	numsnp=4	36608	state2,cn=1	BF.split17	BICF2G630660023	BICF2P109838
chr13:36078894-36115501	13	36078894	36115501	numsnp=4	36608	state2,cn=1	BF.split18	BICF2G630660023	BICF2P109838
chr13:36078894-36115501	13	36078894	36115501	numsnp=4	36608	state2,cn=1	BF.split26	BICF2G630660023	BICF2P109838
chr13:36078894-36115501	13	36078894	36115501	numsnp=4	36608	state2,cn=1	BF.split27	BICF2G630660023	BICF2P109838
chr13:36078894-36115501	13	36078894	36115501	numsnp=4	36608	state2,cn=1	BF.split40	BICF2G630660023	BICF2P109838
chr13:36078894-36115501	13	36078894	36115501	numsnp=4	36608	state2,cn=1	BF.split41	BICF2G630660023	BICF2P109838
chr13:36078894-36115501	13	36078894	36115501	numsnp=4	36608	state2,cn=1	BF.split46	BICF2G630660023	BICF2P109838
chr13:36078894-36115501	13	36078894	36115501	numsnp=4	36608	state2,cn=1	BF.split9 s	BICF2G630660023	BICF2P109838
chr13:36078894-36183807	13	36078894	36183807	numsnp=10	104914	state2,cn=1	BF.split16	BICF2G630660023	BICF2P216391
chr13:36078894-36183807	13	36078894	36183807	numsnp=10	104914	state2,cn=1	BF.split21	BICF2G630660023	BICF2P216391
chr13:36466625-36556191	13	36466625	36556191	numsnp=8	89567	state2,cn=1	BF.split17	BICF2P1214585	BICF2S23061158
chr13:36466625-36556191	13	36466625	36556191	numsnp=8	89567	state2,cn=1	BF.split18	BICF2P1214585	BICF2S23061158
chr13:36466625-36556191	13	36466625	36556191	numsnp=8	89567	state2,cn=1	BF.split19	BICF2P1214585	BICF2S23061158
chr13:36466625-36556191	13	36466625	36556191	numsnp=8	89567	state2,cn=1	BF.split23	BICF2P1214585	BICF2S23061158
chr13:36466625-36556191	13	36466625	36556191	numsnp=8	89567	state2,cn=1	BF.split9 s	BICF2P1214585	BICF2S23061158
chr13:36466625-36797785	13	36466625	36797785	numsnp=25	331161	state2,cn=1	BF.split21	BICF2P1214585	BICF2P1388043
chr13:36655246-36797785	13	36655246	36797785	numsnp=11	142540	state2,cn=1	BF.split26	BICF2P666975	BICF2P1388043
chr13:36655246-36797785	13	36655246	36797785	numsnp=11	142540	state2,cn=1	BF.split27	BICF2P666975	BICF2P1388043
chr13:36655246-36797785	13	36655246	36797785	numsnp=11	142540	state2,cn=1	BF.split41	BICF2P666975	BICF2P1388043
chr13:36692923-36780469	13	36692923	36780469	numsnp=6	87547	state2,cn=1	BF.split4 s	BICF2P1153057	TIGRP2P176253_rs8549359
chr13:36692923-36795273	13	36692923	36795273	numsnp=7	102351	state2,cn=1	BF.split46	BICF2P1153057	TIGRP2P176257_rs9069108
chr13:36692923-36797785	13	36692923	36797785	numsnp=8	104863	state2,cn=1	BF.split18	BICF2P1153057	BICF2P1388043
chr13:36692923-36797785	13	36692923	36797785	numsnp=8	104863	state2,cn=1	BF.split23	BICF2P1153057	BICF2P1388043
chr13:36692923-36797785	13	36692923	36797785	numsnp=8	104863	state2,cn=1	BF.split39	BICF2P1153057	BICF2P1388043
chr13:36780469-36797785	13	36780469	36797785	numsnp=3	17317	state2,cn=1	BF.split33	TIGRP2P176253_rs8549359	BICF2P1388043
chr13:36780469-36797785	13	36780469	36797785	numsnp=3	17317	state2,cn=1	BF.split34	TIGRP2P176253_rs8549359	BICF2P1388043
chr13:36780469-36797785	13	36780469	36797785	numsnp=3	17317	state2,cn=1	BF.split44	TIGRP2P176253_rs8549359	BICF2P1388043
chr13:36780469-36797785	13	36780469	36797785	numsnp=3	17317	state2,cn=1	BF.split6 s	TIGRP2P176253_rs8549359	BICF2P1388043
chr13:36937796-37218075	13	36937796	37218075	numsnp=22	280280	state2,cn=1	BF.split26	TIGRP2P176398_rs8707240	BICF2P1221442
chr13:36937796-37218075	13	36937796	37218075	numsnp=22	280280	state2,cn=1	BF.split41	TIGRP2P176398_rs8707240	BICF2P1221442
chr13:37003662-37107844	13	37003662	37107844	numsnp=10	104183	state2,cn=1	BF.split18	BICF2P1342321	BICF2P595459
chr13:37003662-37107844	13	37003662	37107844	numsnp=10	104183	state2,cn=1	BF.split23	BICF2P1342321	BICF2P595459
chr13:37090794-37218075	13	37090794	37218075	numsnp=9	127282	state2,cn=1	BF.split15	BICF2P333167	BICF2P1221442
chr13:37090794-37218075	13	37090794	37218075	numsnp=9	127282	state2,cn=1	BF.split17	BICF2P333167	BICF2P1221442
chr13:37090794-37218075	13	37090794	37218075	numsnp=9	127282	state2,cn=1	BF.split21	BICF2P333167	BICF2P1221442
chr13:37090794-37218075	13	37090794	37218075	numsnp=9	127282	state2,cn=1	BF.split27	BICF2P333167	BICF2P1221442
chr13:37090794-37218075	13	37090794	37218075	numsnp=9	127282	state2,cn=1	BF.split33	BICF2P333167	BICF2P1221442
chr13:37090794-37218075	13	37090794	37218075	numsnp=9	127282	state2,cn=1	BF.split34	BICF2P333167	BICF2P1221442
chr13:37090794-37218075	13	37090794	37218075	numsnp=9	127282	state2,cn=1	BF.split39	BICF2P333167	BICF2P1221442
chr13:37090794-37218075	13	37090794	37218075	numsnp=9	127282	state2,cn=1	BF.split40	BICF2P333167	BICF2P1221442
chr13:37090794-37218075	13	37090794	37218075	numsnp=9	127282	state2,cn=1	BF.split44	BICF2P333167	BICF2P1221442
chr13:37090794-37218075	13	37090794	37218075	numsnp=9	127282	state2,cn=1	BF.split9 s	BICF2P333167	BICF2P1221442
chr13:37090794-37256739	13	37090794	37256739	numsnp=10	165946	state2,cn=1	BF.split28	BICF2P333167	BICF2P1010240
chr13:37146265-37218075	13	37146265	37218075	numsnp=5	71811	state2,cn=1	BF.split18	TIGRP2P176445_rs8495575	BICF2P1221442
chr13:37146265-37218075	13	37146265	37218075	numsnp=5	71811	state2,cn=1	BF.split23	TIGRP2P176445_rs8495575	BICF2P1221442
chr13:37408659-37462389	13	37408659	37462389	numsnp=6	53731	state2,cn=1	BF.split15	TIGRP2P176487_rs9233725	BICF2P1244912
chr13:37408659-37462389	13	37408659	37462389	numsnp=6	53731	state2,cn=1	BF.split21	TIGRP2P176487_rs9233725	BICF2P1244912
chr13:37408659-37462389	13	37408659	37462389	numsnp=6	53731	state2,cn=1	BF.split27	TIGRP2P176487_rs9233725	BICF2P1244912
chr13:37408659-37462389	13	37408659	37462389	numsnp=6	53731	state2,cn=1	BF.split9 s	TIGRP2P176487_rs9233725	BICF2P1244912
chr13:37422915-37462389	13	37422915	37462389	numsnp=5	39475	state2,cn=1	BF.split39	TIGRP2P176490_rs8571485	BICF2P1244912
chr13:37741140-37964913	13	37741140	37964913	numsnp=16	223774	state2,cn=1	BF.split39	BICF2P1258070	BICF2P643204
chr13:37741140-37995197	13	37741140	37995197	numsnp=19	254058	state2,cn=1	BF.split18	BICF2P1258070	BICF2P1345457
chr13:37741140-37995197	13	37741140	37995197	numsnp=19	254058	state2,cn=1	BF.split23	BICF2P1258070	BICF2P1345457
chr13:37749630-37773950	13	37749630	37773950	numsnp=3	24321	state2,cn=1	BF.split33	TIGRP2P176541_rs9081625	TIGRP2P176544_rs8821775
chr13:37749630-37995197	13	37749630	37995197	numsnp=18	245568	state2,cn=1	BF.split2 s	TIGRP2P176541_rs9081625	BICF2P1345457
chr13:37749630-37995197	13	37749630	37995197	numsnp=18	245568	state2,cn=1	BF.split21	TIGRP2P176541_rs9081625	BICF2P1345457
chr13:37749630-37995197	13	37749630	37995197	numsnp=18	245568	state2,cn=1	BF.split26	TIGRP2P176541_rs9081625	BICF2P1345457
chr13:37749630-37995197	13	37749630	37995197	numsnp=18	245568	state2,cn=1	BF.split27	TIGRP2P176541_rs9081625	BICF2P1345457
chr13:37749630-37995197	13	37749630	37995197	numsnp=18	245568	state2,cn=1	BF.split4 s	TIGRP2P176541_rs9081625	BICF2P1345457
chr13:37749630-37995197	13	37749630	37995197	numsnp=18	245568	state2,cn=1	BF.split41	TIGRP2P176541_rs9081625	BICF2P1345457
chr13:37749630-37995197	13	37749630	37995197	numsnp=18	245568	state2,cn=1	BF.split46	TIGRP2P176541_rs9081625	BICF2P1345457
chr13:37883021-37995197	13	37883021	37995197	numsnp=9	112177	state2,cn=1	BF.split43	BICF2P1433021	BICF2P1345457
chr13:37944777-37995197	13	37944777	37995197	numsnp=5	50421	state2,cn=1	BF.split44	TIGRP2P176590_rs8808518	BICF2P1345457
chr13:38311893-38390619	13	38311893	38390619	numsnp=9	78727	state2,cn=1	BF.split23	BICF2P166765	BICF2P777
chr13:38311893-38390619	13	38311893	38390619	numsnp=9	78727	state2,cn=1	BF.split27	BICF2P166765	BICF2P777
chr13:38803566-38908921	13	38803566	38908921	numsnp=8	105356	state2,cn=1	BF.split19	BICF2S23618399	TIGRP2P176902_rs8718686
chr13:38837733-38908921	13	38837733	38908921	numsnp=6	71189	state2,cn=1	BF.split37	BICF2P64599	TIGRP2P176902_rs8718686
chr13:38837733-38908921	13	38837733	38908921	numsnp=6	71189	state2,cn=1	BF.split6 s	BICF2P64599	TIGRP2P176902_rs8718686
chr13:38837733-38924425	13	38837733	38924425	numsnp=7	86693	state2,cn=1	BF.split39	BICF2P64599	TIGRP2P176915_rs8974490
chr13:38837733-38965403	13	38837733	38965403	numsnp=11	127671	state2,cn=1	BF.split21	BICF2P64599	BICF2P732536
chr13:38886582-38908921	13	38886582	38908921	numsnp=3	22340	state2,cn=1	BF.split17	BICF2P473216	TIGRP2P176902_rs8718686
chr13:38886582-38924425	13	38886582	38924425	numsnp=4	37844	state2,cn=1	BF.split2 s	BICF2P473216	TIGRP2P176915_rs8974490
chr13:38886582-38924425	13	38886582	38924425	numsnp=4	37844	state2,cn=1	BF.split4 s	BICF2P473216	TIGRP2P176915_rs8974490
chr13:38886582-38924425	13	38886582	38924425	numsnp=4	37844	state2,cn=1	BF.split43	BICF2P473216	TIGRP2P176915_rs8974490
chr13:39029155-39118533	13	39029155	39118533	numsnp=8	89379	state5,cn=3	BF.split44	BICF2P736906	BICF2P1114091
chr14:628308-725468	14	628308	725468	numsnp=8	97161	state2,cn=1	BF.split39	BICF2P386682	BICF2G630517145
chr14:645047-690052	14	645047	690052	numsnp=4	45006	state2,cn=1	BF.split43	BICF2P693197	BICF2S23661618
chr14:645047-690052	14	645047	690052	numsnp=4	45006	state2,cn=1	BF.split45	BICF2P693197	BICF2S23661618
chr14:853721-980198	14	853721	980198	numsnp=11	126478	state2,cn=1	BF.split39	BICF2S2373579	BICF2P680493
chr14:853721-1000647	14	853721	1000647	numsnp=12	146927	state2,cn=1	BF.split21	BICF2S2373579	BICF2P427413
chr14:853721-1000647	14	853721	1000647	numsnp=12	146927	state2,cn=1	BF.split23	BICF2S2373579	BICF2P427413
chr14:884155-959840	14	884155	959840	numsnp=7	75686	state2,cn=1	BF.split44	BICF2P718943	BICF2P1171735
chr14:884155-959840	14	884155	959840	numsnp=7	75686	state2,cn=1	BF.split45	BICF2P718943	BICF2P1171735
chr14:884155-1000647	14	884155	1000647	numsnp=9	116493	state2,cn=1	BF.split16	BICF2P718943	BICF2P427413
chr14:884155-1000647	14	884155	1000647	numsnp=9	116493	state2,cn=1	BF.split18	BICF2P718943	BICF2P427413
chr14:884155-1000647	14	884155	1000647	numsnp=9	116493	state2,cn=1	BF.split19	BICF2P718943	BICF2P427413
chr14:884155-1000647	14	884155	1000647	numsnp=9	116493	state2,cn=1	BF.split27	BICF2P718943	BICF2P427413
chr14:884155-1000647	14	884155	1000647	numsnp=9	116493	state2,cn=1	BF.split40	BICF2P718943	BICF2P427413
chr14:884155-1000647	14	884155	1000647	numsnp=9	116493	state2,cn=1	BF.split43	BICF2P718943	BICF2P427413
chr14:897657-1000647	14	897657	1000647	numsnp=8	102991	state2,cn=1	BF.split9 s	BICF2G630517190	BICF2P427413
chr14:945637-959840	14	945637	959840	numsnp=3	14204	state2,cn=1	BF.split33	BICF2G630517202	BICF2P1171735
chr14:945637-959840	14	945637	959840	numsnp=3	14204	state2,cn=1	BF.split37	BICF2G630517202	BICF2P1171735
chr14:945637-959840	14	945637	959840	numsnp=3	14204	state2,cn=1	BF.split6 s	BICF2G630517202	BICF2P1171735
chr14:945637-980198	14	945637	980198	numsnp=4	34562	state2,cn=1	BF.split26	BICF2G630517202	BICF2P680493
chr14:945637-980198	14	945637	980198	numsnp=4	34562	state2,cn=1	BF.split28	BICF2G630517202	BICF2P680493
chr14:945637-980198	14	945637	980198	numsnp=4	34562	state2,cn=1	BF.split4 s	BICF2G630517202	BICF2P680493
chr14:945637-1000647	14	945637	1000647	numsnp=5	55011	state2,cn=1	BF.split15	BICF2G630517202	BICF2P427413
chr14:945637-1000647	14	945637	1000647	numsnp=5	55011	state2,cn=1	BF.split17	BICF2G630517202	BICF2P427413
chr14:945637-1000647	14	945637	1000647	numsnp=5	55011	state2,cn=1	BF.split41	BICF2G630517202	BICF2P427413
chr14:2354354-2529729	14	2354354	2529729	numsnp=12	175376	state5,cn=3	BF.split37	BICF2G630517504	BICF2G630517637
chr14:2354354-2823246	14	2354354	2823246	numsnp=28	468893	state5,cn=3	BF.split4 s	BICF2G630517504	BICF2G630517802
chr14:2354354-2875196	14	2354354	2875196	numsnp=29	520843	state5,cn=3	BF.split15	BICF2G630517504	G813f42S171
chr14:2354354-2875196	14	2354354	2875196	numsnp=29	520843	state5,cn=3	BF.split35	BICF2G630517504	G813f42S171
chr14:2370217-2875196	14	2370217	2875196	numsnp=28	504980	state5,cn=3	BF.split33	BICF2G630517516	G813f42S171
chr14:2384738-2823246	14	2384738	2823246	numsnp=26	438509	state5,cn=3	BF.split28	BICF2P194739	BICF2G630517802
chr14:2393780-2823246	14	2393780	2823246	numsnp=25	429467	state5,cn=3	BF.split2 s	BICF2S23428563	BICF2G630517802
chr14:2393780-2875196	14	2393780	2875196	numsnp=26	481417	state5,cn=3	BF.split26	BICF2S23428563	G813f42S171
chr14:2393780-2875196	14	2393780	2875196	numsnp=26	481417	state5,cn=3	BF.split41	BICF2S23428563	G813f42S171
chr14:2418990-2823246	14	2418990	2823246	numsnp=24	404257	state5,cn=3	BF.split6 s	BICF2G630517550	BICF2G630517802
chr14:2418990-2875196	14	2418990	2875196	numsnp=25	456207	state5,cn=3	BF.split16	BICF2G630517550	G813f42S171
chr14:2418990-2875196	14	2418990	2875196	numsnp=25	456207	state5,cn=3	BF.split18	BICF2G630517550	G813f42S171
chr14:2589088-2654618	14	2589088	2654618	numsnp=6	65531	state5,cn=3	BF.split34	BICF2G630517713	BICF2G630517746
chr14:2589088-2717089	14	2589088	2717089	numsnp=10	128002	state5,cn=3	BF.split21	BICF2G630517713	BICF2G630517773
chr14:2783652-2875196	14	2783652	2875196	numsnp=5	91545	state5,cn=3	BF.split27	BICF2G630517794	G813f42S171
chr14:47221615-47251485	14	47221615	47251485	numsnp=4	29871	state5,cn=3	BF.split39	BICF2P1355625	TIGRP2P193939_rs9136401
chr14:57464864-57518154	14	57464864	57518154	numsnp=4	53291	state2,cn=1	BF.split44	G848f40S320	BICF2S23634171
chr14:57464864-57518154	14	57464864	57518154	numsnp=4	53291	state2,cn=1	BF.split6 s	G848f40S320	BICF2S23634171
chr14:60071291-60121432	14	60071291	60121432	numsnp=5	50142	state2,cn=1	BF.split23	BICF2S2361849	BICF2P463273
chr14:60071291-60121432	14	60071291	60121432	numsnp=5	50142	state2,cn=1	BF.split40	BICF2S2361849	BICF2P463273
chr14:60104526-60121432	14	60104526	60121432	numsnp=3	16907	state2,cn=1	BF.split2 s	BICF2P946350	BICF2P463273
chr15:89822-118548	15	89822	118548	numsnp=3	28727	state5,cn=3	BF.split44	TIGRP2P208116_rs8590108	TIGRP2P208216_rs8501616
chr15:1313896-1485291	15	1313896	1485291	numsnp=9	171396	state2,cn=1	BF.split4 s	BICF2S23242663	BICF2P682726
chr15:1367750-1424398	15	1367750	1424398	numsnp=5	56649	state2,cn=1	BF.split18	BICF2S23640369	BICF2P1031573
chr15:1367750-1442985	15	1367750	1442985	numsnp=6	75236	state2,cn=1	BF.split37	BICF2S23640369	BICF2S2343703
chr15:1702766-1745351	15	1702766	1745351	numsnp=3	42586	state2,cn=1	BF.split18	BICF2P670802	BICF2P917852
chr15:1702766-1745351	15	1702766	1745351	numsnp=3	42586	state2,cn=1	BF.split28	BICF2P670802	BICF2P917852
chr15:1702766-1762076	15	1702766	1762076	numsnp=4	59311	state2,cn=1	BF.split37	BICF2P670802	BICF2S23317553
chr15:1702766-1762076	15	1702766	1762076	numsnp=4	59311	state2,cn=1	BF.split40	BICF2P670802	BICF2S23317553
chr15:1800491-2088252	15	1800491	2088252	numsnp=14	287762	state5,cn=3	BF.split23	BICF2S23323874	TIGRP2P204051_rs8789952
chr15:1800491-2088252	15	1800491	2088252	numsnp=14	287762	state5,cn=3	BF.split24	BICF2S23323874	TIGRP2P204051_rs8789952
chr15:1800491-2088252	15	1800491	2088252	numsnp=14	287762	state5,cn=3	BF.split28	BICF2S23323874	TIGRP2P204051_rs8789952
chr15:1816207-2088252	15	1816207	2088252	numsnp=13	272046	state5,cn=3	BF.split45	BICF2P1459883	TIGRP2P204051_rs8789952
chr15:1816207-2129503	15	1816207	2129503	numsnp=15	313297	state5,cn=3	BF.split4 s	BICF2P1459883	BICF2P562835
chr15:2143178-2355639	15	2143178	2355639	numsnp=13	212462	state2,cn=1	BF.split4 s	BICF2P683034	TIGRP2P204065_rs9170239
chr15:2175727-2355639	15	2175727	2355639	numsnp=11	179913	state2,cn=1	BF.split26	BICF2P1386487	TIGRP2P204065_rs9170239
chr15:2175727-2511279	15	2175727	2511279	numsnp=16	335553	state2,cn=1	BF.split43	BICF2P1386487	BICF2S23545443
chr15:2218624-2456134	15	2218624	2456134	numsnp=13	237511	state2,cn=1	BF.split28	BICF2S23255424	G856f27S128
chr15:2259655-2381608	15	2259655	2381608	numsnp=8	121954	state2,cn=1	BF.split41	BICF2P170184	BICF2P101960
chr15:2259655-2511279	15	2259655	2511279	numsnp=11	251625	state2,cn=1	BF.split19	BICF2P170184	BICF2S23545443
chr15:2259655-2511279	15	2259655	2511279	numsnp=11	251625	state2,cn=1	BF.split27	BICF2P170184	BICF2S23545443
chr15:2259655-2672629	15	2259655	2672629	numsnp=19	412975	state2,cn=1	BF.split35	BICF2P170184	BICF2S2319349
chr15:2345493-2408558	15	2345493	2408558	numsnp=5	63066	state2,cn=1	BF.split6 s	TIGRP2P204063_rs8955770	G855f44S69
chr15:2345493-2511279	15	2345493	2511279	numsnp=7	165787	state2,cn=1	BF.split17	TIGRP2P204063_rs8955770	BICF2S23545443
chr15:2345493-2538872	15	2345493	2538872	numsnp=9	193380	state2,cn=1	BF.split40	TIGRP2P204063_rs8955770	TIGRP2P204070_rs8766406
chr15:6033520-6100529	15	6033520	6100529	numsnp=5	67010	state2,cn=1	BF.split19	TIGRP2P204536_rs8691961	BICF2S23348405
chr15:6033520-6100529	15	6033520	6100529	numsnp=5	67010	state2,cn=1	BF.split28	TIGRP2P204536_rs8691961	BICF2S23348405
chr15:6033520-6100529	15	6033520	6100529	numsnp=5	67010	state2,cn=1	BF.split41	TIGRP2P204536_rs8691961	BICF2S23348405
chr15:6033520-6117160	15	6033520	6117160	numsnp=6	83641	state2,cn=1	BF.split4 s	TIGRP2P204536_rs8691961	BICF2P816846
chr15:7847615-7895743	15	7847615	7895743	numsnp=5	48129	state2,cn=1	BF.split19	BICF2P363342	BICF2P953500
chr15:7847615-8454410	15	7847615	8454410	numsnp=47	606796	state2,cn=1	BF.split40	BICF2P363342	BICF2P294651
chr15:8151549-8384052	15	8151549	8384052	numsnp=15	232504	state2,cn=1	BF.split15	TIGRP2P195277_rs8589772	BICF2G630444293
chr15:8151549-8384052	15	8151549	8384052	numsnp=15	232504	state2,cn=1	BF.split43	TIGRP2P195277_rs8589772	BICF2G630444293
chr15:8151549-8384052	15	8151549	8384052	numsnp=15	232504	state2,cn=1	BF.split46	TIGRP2P195277_rs8589772	BICF2G630444293
chr15:8151549-8394903	15	8151549	8394903	numsnp=16	243355	state2,cn=1	BF.split33	TIGRP2P195277_rs8589772	BICF2G630444284
chr15:8151549-8394903	15	8151549	8394903	numsnp=16	243355	state2,cn=1	BF.split45	TIGRP2P195277_rs8589772	BICF2G630444284
chr15:8151549-8454410	15	8151549	8454410	numsnp=21	302862	state2,cn=1	BF.split19	TIGRP2P195277_rs8589772	BICF2P294651
chr15:8151549-8464781	15	8151549	8464781	numsnp=22	313233	state2,cn=1	BF.split27	TIGRP2P195277_rs8589772	BICF2P841695
chr15:8151549-8546323	15	8151549	8546323	numsnp=25	394775	state2,cn=1	BF.split17	TIGRP2P195277_rs8589772	BICF2P8024
chr15:8189874-8394903	15	8189874	8394903	numsnp=13	205030	state2,cn=1	BF.split6 s	BICF2P531211	BICF2G630444284
chr15:8242039-8341839	15	8242039	8341839	numsnp=9	99801	state2,cn=1	BF.split35	BICF2P781012	BICF2P1237493
chr15:8242039-8384052	15	8242039	8384052	numsnp=11	142014	state2,cn=1	BF.split2 s	BICF2P781012	BICF2G630444293
chr15:8242039-8394903	15	8242039	8394903	numsnp=12	152865	state2,cn=1	BF.split21	BICF2P781012	BICF2G630444284
chr15:8242039-8394903	15	8242039	8394903	numsnp=12	152865	state2,cn=1	BF.split34	BICF2P781012	BICF2G630444284
chr15:8242039-8421416	15	8242039	8421416	numsnp=15	179378	state2,cn=1	BF.split23	BICF2P781012	BICF2P1297288
chr15:8276202-8341839	15	8276202	8341839	numsnp=6	65638	state2,cn=1	BF.split18	BICF2S22939341	BICF2P1237493
chr15:8276202-8384052	15	8276202	8384052	numsnp=8	107851	state2,cn=1	BF.split37	BICF2S22939341	BICF2G630444293
chr15:8276202-8454410	15	8276202	8454410	numsnp=14	178209	state2,cn=1	BF.split9 s	BICF2S22939341	BICF2P294651
chr15:8309212-8394903	15	8309212	8394903	numsnp=7	85692	state2,cn=1	BF.split41	BICF2G630444326	BICF2G630444284
chr15:8770278-9007530	15	8770278	9007530	numsnp=20	237253	state2,cn=1	BF.split23	BICF2S23542285	BICF2G630443960
chr15:8779825-8818456	15	8779825	8818456	numsnp=4	38632	state2,cn=1	BF.split16	BICF2S2343870	BICF2G630444025
chr15:8801056-8834322	15	8801056	8834322	numsnp=5	33267	state2,cn=1	BF.split19	BICF2P284408	BICF2G630444021
chr15:8801056-8834322	15	8801056	8834322	numsnp=5	33267	state2,cn=1	BF.split35	BICF2P284408	BICF2G630444021
chr15:8804900-8822341	15	8804900	8822341	numsnp=3	17442	state2,cn=1	BF.split46	BICF2P1384998	BICF2S2306938
chr15:8804900-8844341	15	8804900	8844341	numsnp=5	39442	state2,cn=1	BF.split39	BICF2P1384998	BICF2G630444015
chr15:8804900-8900233	15	8804900	8900233	numsnp=9	95334	state2,cn=1	BF.split40	BICF2P1384998	BICF2G630443998
chr15:8859223-9113704	15	8859223	9113704	numsnp=21	254482	state5,cn=3	BF.split39	BICF2G630444011	BICF2G630443895
chr15:8985935-9024348	15	8985935	9024348	numsnp=5	38414	state2,cn=1	BF.split33	TIGRP2P195440_rs8606218	BICF2G630443952
chr15:8994644-9017841	15	8994644	9017841	numsnp=3	23198	state2,cn=1	BF.split6 s	BICF2G630443965	BICF2P634569
chr15:8994644-9032702	15	8994644	9032702	numsnp=5	38059	state2,cn=1	BF.split45	BICF2G630443965	BICF2G630443949
chr15:9007530-9024348	15	9007530	9024348	numsnp=3	16819	state2,cn=1	BF.split4 s	BICF2G630443960	BICF2G630443952
chr15:9017841-9113704	15	9017841	9113704	numsnp=9	95864	state5,cn=3	BF.split24	BICF2P634569	BICF2G630443895
chr15:9024348-9113704	15	9024348	9113704	numsnp=8	89357	state5,cn=3	BF.split6 s	BICF2G630443952	BICF2G630443895
chr15:9032702-9077077	15	9032702	9077077	numsnp=4	44376	state5,cn=3	BF.split4 s	BICF2G630443949	BICF2G630443921
chr15:9032702-9095002	15	9032702	9095002	numsnp=6	62301	state5,cn=3	BF.split28	BICF2G630443949	BICF2G630443908
chr15:9032702-9095002	15	9032702	9095002	numsnp=6	62301	state5,cn=3	BF.split33	BICF2G630443949	BICF2G630443908
chr15:9047708-9095002	15	9047708	9095002	numsnp=5	47295	state5,cn=3	BF.split45	BICF2G630443939	BICF2G630443908
chr15:9113704-9153890	15	9113704	9153890	numsnp=3	40187	state2,cn=1	BF.split33	BICF2G630443895	BICF2G630443876
chr15:9113704-9153890	15	9113704	9153890	numsnp=3	40187	state2,cn=1	BF.split45	BICF2G630443895	BICF2G630443876
chr15:9113704-9162530	15	9113704	9162530	numsnp=4	48827	state2,cn=1	BF.split27	BICF2G630443895	BICF2P333054
chr15:9113704-9162530	15	9113704	9162530	numsnp=4	48827	state2,cn=1	BF.split28	BICF2G630443895	BICF2P333054
chr15:9126594-9171327	15	9126594	9171327	numsnp=4	44734	state2,cn=1	BF.split39	BICF2P294799	BICF2G630443860
chr15:9231567-9281402	15	9231567	9281402	numsnp=4	49836	state2,cn=1	BF.split35	TIGRP2P195452_rs8840443	TIGRP2P195481_rs8544182
chr15:9483542-9535581	15	9483542	9535581	numsnp=6	52040	state2,cn=1	BF.split2 s	BICF2G630443747	BICF2G630443693
chr15:9502821-9535581	15	9502821	9535581	numsnp=5	32761	state2,cn=1	BF.split19	BICF2G630443732	BICF2G630443693
chr15:9502821-9605470	15	9502821	9605470	numsnp=11	102650	state5,cn=3	BF.split24	BICF2G630443732	BICF2G630443653
chr15:9502821-9623638	15	9502821	9623638	numsnp=13	120818	state5,cn=3	BF.split17	BICF2G630443732	BICF2P477511
chr15:9507855-9535581	15	9507855	9535581	numsnp=4	27727	state2,cn=1	BF.split45	BICF2G630443723	BICF2G630443693
chr15:9507855-9535581	15	9507855	9535581	numsnp=4	27727	state2,cn=1	BF.split46	BICF2G630443723	BICF2G630443693
chr15:9507855-9802559	15	9507855	9802559	numsnp=25	294705	state2,cn=1	BF.split33	BICF2G630443723	BICF2P522708
chr15:9527368-9623638	15	9527368	9623638	numsnp=10	96271	state5,cn=3	BF.split9 s	BICF2P1127705	BICF2P477511
chr15:9527368-9665296	15	9527368	9665296	numsnp=13	137929	state5,cn=3	BF.split27	BICF2P1127705	BICF2G630443626
chr15:9527368-9691374	15	9527368	9691374	numsnp=15	164007	state5,cn=3	BF.split28	BICF2P1127705	BICF2G630443579
chr15:9546684-9605470	15	9546684	9605470	numsnp=6	58787	state5,cn=3	BF.split19	BICF2G630443683	BICF2G630443653
chr15:9546684-9623638	15	9546684	9623638	numsnp=8	76955	state5,cn=3	BF.split2 s	BICF2G630443683	BICF2P477511
chr15:9546684-9623638	15	9546684	9623638	numsnp=8	76955	state5,cn=3	BF.split45	BICF2G630443683	BICF2P477511
chr15:9546684-9691374	15	9546684	9691374	numsnp=13	144691	state5,cn=3	BF.split46	BICF2G630443683	BICF2G630443579
chr15:9615484-9647700	15	9615484	9647700	numsnp=3	32217	state2,cn=1	BF.split24	TIGRP2P195557_rs9047707	BICF2G630443632
chr15:9615484-9730132	15	9615484	9730132	numsnp=11	114649	state2,cn=1	BF.split19	TIGRP2P195557_rs9047707	BICF2P1270151
chr15:9615484-9802559	15	9615484	9802559	numsnp=15	187076	state2,cn=1	BF.split23	TIGRP2P195557_rs9047707	BICF2P522708
chr15:9615484-9802559	15	9615484	9802559	numsnp=15	187076	state2,cn=1	BF.split37	TIGRP2P195557_rs9047707	BICF2P522708
chr15:9647700-9730132	15	9647700	9730132	numsnp=9	82433	state2,cn=1	BF.split17	BICF2G630443632	BICF2P1270151
chr15:9647700-9730132	15	9647700	9730132	numsnp=9	82433	state2,cn=1	BF.split45	BICF2G630443632	BICF2P1270151
chr15:9647700-9802559	15	9647700	9802559	numsnp=13	154860	state2,cn=1	BF.split41	BICF2G630443632	BICF2P522708
chr15:9647700-9987591	15	9647700	9987591	numsnp=27	339892	state2,cn=1	BF.split9 s	BICF2G630443632	BICF2P1170954
chr15:9683059-9730132	15	9683059	9730132	numsnp=6	47074	state2,cn=1	BF.split27	BICF2G630443583	BICF2P1270151
chr15:9683059-9987591	15	9683059	9987591	numsnp=24	304533	state2,cn=1	BF.split40	BICF2G630443583	BICF2P1170954
chr15:9702964-9780268	15	9702964	9780268	numsnp=7	77305	state2,cn=1	BF.split28	BICF2G630443572	BICF2P1044331
chr15:9702964-9802559	15	9702964	9802559	numsnp=8	99596	state2,cn=1	BF.split46	BICF2G630443572	BICF2P522708
chr15:9887775-9968603	15	9887775	9968603	numsnp=7	80829	state2,cn=1	BF.split45	BICF2P959165	BICF2G630443531
chr15:9887775-9987591	15	9887775	9987591	numsnp=8	99817	state2,cn=1	BF.split39	BICF2P959165	BICF2P1170954
chr15:9940318-9987591	15	9940318	9987591	numsnp=5	47274	state2,cn=1	BF.split6 s	BICF2G630443535	BICF2P1170954
chr15:9968603-10041647	15	9968603	10041647	numsnp=5	73045	state2,cn=1	BF.split24	BICF2G630443531	TIGRP2P195654_rs8566780
chr15:17723901-17778277	15	17723901	17778277	numsnp=6	54377	state2,cn=1	BF.split6 s	BICF2P658547	BICF2P932852
chr15:29973349-30008279	15	29973349	30008279	numsnp=3	34931	state5,cn=3	BF.split39	TIGRP2P198593_rs8972241	TIGRP2P198686_rs8470730
chr15:29973349-30008279	15	29973349	30008279	numsnp=3	34931	state5,cn=3	BF.split45	TIGRP2P198593_rs8972241	TIGRP2P198686_rs8470730
chr15:29973349-30008279	15	29973349	30008279	numsnp=3	34931	state5,cn=3	BF.split46	TIGRP2P198593_rs8972241	TIGRP2P198686_rs8470730
chr15:52461221-52481838	15	52461221	52481838	numsnp=3	20618	state5,cn=3	BF.split33	BICF2G630426340	BICF2G630426332
chr15:62431737-62504810	15	62431737	62504810	numsnp=6	73074	state5,cn=3	BF.split21	BICF2S2365479	BICF2P881016
chr16:313889-535352	16	313889	535352	numsnp=14	221464	state2,cn=1	BF.split18	BICF2S23513599	BICF2S23747408
chr16:313889-535352	16	313889	535352	numsnp=14	221464	state2,cn=1	BF.split23	BICF2S23513599	BICF2S23747408
chr16:313889-535352	16	313889	535352	numsnp=14	221464	state2,cn=1	BF.split9 s	BICF2S23513599	BICF2S23747408
chr16:383954-535352	16	383954	535352	numsnp=12	151399	state2,cn=1	BF.split17	BICF2S22915646	BICF2S23747408
chr16:383954-535352	16	383954	535352	numsnp=12	151399	state2,cn=1	BF.split21	BICF2S22915646	BICF2S23747408
chr16:483335-535352	16	483335	535352	numsnp=4	52018	state2,cn=1	BF.split16	BICF2S23622240	BICF2S23747408
chr16:708997-1074215	16	708997	1074215	numsnp=25	365219	state2,cn=1	BF.split19	BICF2S23046106	BICF2S23255367
chr16:975932-1074215	16	975932	1074215	numsnp=7	98284	state2,cn=1	BF.split17	BICF2S22911911	BICF2S23255367
chr16:975932-1074215	16	975932	1074215	numsnp=7	98284	state2,cn=1	BF.split21	BICF2S22911911	BICF2S23255367
chr16:54359274-54389039	16	54359274	54389039	numsnp=4	29766	state2,cn=1	BF.split44	BICF2P1240333	BICF2G630820053
chr17:188778-578394	17	188778	578394	numsnp=31	389617	state2,cn=1	BF.split21	BICF2P1272558	BICF2S23523907
chr17:686181-930518	17	686181	930518	numsnp=18	244338	state2,cn=1	BF.split41	TIGRP2P227797_rs9125764	TIGRP2P227802_rs9048806
chr17:749155-818590	17	749155	818590	numsnp=5	69436	state2,cn=1	BF.split6 s	BICF2S2362493	BICF2S23136090
chr17:749155-930518	17	749155	930518	numsnp=12	181364	state2,cn=1	BF.split15	BICF2S2362493	TIGRP2P227802_rs9048806
chr17:749155-930518	17	749155	930518	numsnp=12	181364	state2,cn=1	BF.split9 s	BICF2S2362493	TIGRP2P227802_rs9048806
chr17:777920-930518	17	777920	930518	numsnp=11	152599	state2,cn=1	BF.split44	BICF2P217820	TIGRP2P227802_rs9048806
chr17:1528924-1566740	17	1528924	1566740	numsnp=5	37817	state2,cn=1	BF.split15	BICF2S23661069	BICF2P998863
chr17:1528924-1566740	17	1528924	1566740	numsnp=5	37817	state2,cn=1	BF.split2 s	BICF2S23661069	BICF2P998863
chr17:1528924-1566740	17	1528924	1566740	numsnp=5	37817	state2,cn=1	BF.split28	BICF2S23661069	BICF2P998863
chr17:1528924-1566740	17	1528924	1566740	numsnp=5	37817	state2,cn=1	BF.split39	BICF2S23661069	BICF2P998863
chr17:1528924-1566740	17	1528924	1566740	numsnp=5	37817	state2,cn=1	BF.split4 s	BICF2S23661069	BICF2P998863
chr17:1528924-1566740	17	1528924	1566740	numsnp=5	37817	state2,cn=1	BF.split43	BICF2S23661069	BICF2P998863
chr17:1528924-1642112	17	1528924	1642112	numsnp=11	113189	state2,cn=1	BF.split17	BICF2S23661069	BICF2P943596
chr17:1528924-1642112	17	1528924	1642112	numsnp=11	113189	state2,cn=1	BF.split19	BICF2S23661069	BICF2P943596
chr17:1528924-1642112	17	1528924	1642112	numsnp=11	113189	state2,cn=1	BF.split26	BICF2S23661069	BICF2P943596
chr17:1528924-1642112	17	1528924	1642112	numsnp=11	113189	state2,cn=1	BF.split41	BICF2S23661069	BICF2P943596
chr17:1528924-1642112	17	1528924	1642112	numsnp=11	113189	state2,cn=1	BF.split44	BICF2S23661069	BICF2P943596
chr17:1844703-1898225	17	1844703	1898225	numsnp=6	53523	state2,cn=1	BF.split21	BICF2P563598	BICF2S22926228
chr17:1844703-1898225	17	1844703	1898225	numsnp=6	53523	state2,cn=1	BF.split41	BICF2P563598	BICF2S22926228
chr17:1844703-1898225	17	1844703	1898225	numsnp=6	53523	state2,cn=1	BF.split43	BICF2P563598	BICF2S22926228
chr17:21079884-21089200	17	21079884	21089200	numsnp=3	9317	state2,cn=1	BF.split15	BICF2P1081073	BICF2P828244
chr17:39871902-39905486	17	39871902	39905486	numsnp=4	33585	state2,cn=1	BF.split19	TIGRP2P231401_rs8544762	TIGRP2P231415_rs8979551
chr17:39871902-39905486	17	39871902	39905486	numsnp=4	33585	state2,cn=1	BF.split40	TIGRP2P231401_rs8544762	TIGRP2P231415_rs8979551
chr17:56701586-56761278	17	56701586	56761278	numsnp=5	59693	state5,cn=3	BF.split21	BICF2G630285265	BICF2G630285476
chr17:56701586-56761278	17	56701586	56761278	numsnp=5	59693	state5,cn=3	BF.split24	BICF2G630285265	BICF2G630285476
chr17:56701586-56761278	17	56701586	56761278	numsnp=5	59693	state5,cn=3	BF.split26	BICF2G630285265	BICF2G630285476
chr17:56701586-56761278	17	56701586	56761278	numsnp=5	59693	state5,cn=3	BF.split41	BICF2G630285265	BICF2G630285476
chr17:63200661-63243035	17	63200661	63243035	numsnp=5	42375	state2,cn=1	BF.split18	BICF2S2291499	BICF2P117656
chr17:63200661-63243035	17	63200661	63243035	numsnp=5	42375	state2,cn=1	BF.split23	BICF2S2291499	BICF2P117656
chr17:63200661-63243035	17	63200661	63243035	numsnp=5	42375	state2,cn=1	BF.split9 s	BICF2S2291499	BICF2P117656
chr18:64779-170509	18	64779	170509	numsnp=6	105731	state2,cn=1	BF.split40	BICF2S23145797	BICF2P271099
chr18:92860-170509	18	92860	170509	numsnp=4	77650	state2,cn=1	BF.split44	BICF2P264063	BICF2P271099
chr18:1252439-1339384	18	1252439	1339384	numsnp=6	86946	state2,cn=1	BF.split27	BICF2P860302	TIGRP2P238103_rs8595601
chr18:1942212-2017552	18	1942212	2017552	numsnp=8	75341	state2,cn=1	BF.split41	TIGRP2P238132_rs8757806	TIGRP2P238162_rs8805509
chr18:25507745-25740090	18	25507745	25740090	numsnp=20	232346	state2,cn=1	BF.split9 s	BICF2S23317158	BICF2P14496
chr18:25551868-25835512	18	25551868	25835512	numsnp=23	283645	state2,cn=1	BF.split27	BICF2P1296917	TIGRP2P246809_rs8956242
chr18:25644344-25740090	18	25644344	25740090	numsnp=11	95747	state2,cn=1	BF.split15	BICF2P1358625	BICF2P14496
chr18:25644344-25740090	18	25644344	25740090	numsnp=11	95747	state2,cn=1	BF.split16	BICF2P1358625	BICF2P14496
chr18:25644344-25740090	18	25644344	25740090	numsnp=11	95747	state2,cn=1	BF.split18	BICF2P1358625	BICF2P14496
chr18:25644344-25740090	18	25644344	25740090	numsnp=11	95747	state2,cn=1	BF.split23	BICF2P1358625	BICF2P14496
chr18:25644344-25835512	18	25644344	25835512	numsnp=17	191169	state2,cn=1	BF.split40	BICF2P1358625	TIGRP2P246809_rs8956242
chr18:25703264-25740090	18	25703264	25740090	numsnp=5	36827	state2,cn=1	BF.split46	BICF2P1437597	BICF2P14496
chr18:25703264-25835512	18	25703264	25835512	numsnp=11	132249	state2,cn=1	BF.split44	BICF2P1437597	TIGRP2P246809_rs8956242
chr18:25712910-25740090	18	25712910	25740090	numsnp=4	27181	state2,cn=1	BF.split6 s	BICF2P1282634	BICF2P14496
chr18:25712910-25822263	18	25712910	25822263	numsnp=9	109354	state2,cn=1	BF.split19	BICF2P1282634	BICF2P166367
chr18:41201448-41286087	18	41201448	41286087	numsnp=5	84640	state5,cn=3	BF.split15	TIGRP2P252941_rs8934066	TIGRP2P253035_rs8601902
chr18:41201448-41313571	18	41201448	41313571	numsnp=6	112124	state5,cn=3	BF.split26	TIGRP2P252941_rs8934066	BICF2G630693099
chr18:42185684-42232638	18	42185684	42232638	numsnp=5	46955	state2,cn=1	BF.split27	BICF2P1333536	BICF2P935846
chr18:42199134-42221726	18	42199134	42221726	numsnp=3	22593	state2,cn=1	BF.split46	BICF2P765522	BICF2P517742
chr18:42199134-42232638	18	42199134	42232638	numsnp=4	33505	state2,cn=1	BF.split15	BICF2P765522	BICF2P935846
chr18:42199134-42232638	18	42199134	42232638	numsnp=4	33505	state2,cn=1	BF.split19	BICF2P765522	BICF2P935846
chr18:42199134-42232638	18	42199134	42232638	numsnp=4	33505	state2,cn=1	BF.split2 s	BICF2P765522	BICF2P935846
chr18:42199134-42232638	18	42199134	42232638	numsnp=4	33505	state2,cn=1	BF.split28	BICF2P765522	BICF2P935846
chr18:42199134-42232638	18	42199134	42232638	numsnp=4	33505	state2,cn=1	BF.split33	BICF2P765522	BICF2P935846
chr18:42199134-42232638	18	42199134	42232638	numsnp=4	33505	state2,cn=1	BF.split40	BICF2P765522	BICF2P935846
chr18:42199134-42232638	18	42199134	42232638	numsnp=4	33505	state2,cn=1	BF.split41	BICF2P765522	BICF2P935846
chr18:42199134-42232638	18	42199134	42232638	numsnp=4	33505	state2,cn=1	BF.split43	BICF2P765522	BICF2P935846
chr18:45476257-45555347	18	45476257	45555347	numsnp=7	79091	state2,cn=1	BF.split27	BICF2S23612394	BICF2G630690945
chr18:46464800-46600419	18	46464800	46600419	numsnp=14	135620	state2,cn=1	BF.split19	BICF2P324717	BICF2P902032
chr18:46521374-46565444	18	46521374	46565444	numsnp=5	44071	state2,cn=1	BF.split16	BICF2P706211	BICF2P778313
chr18:46521374-46565444	18	46521374	46565444	numsnp=5	44071	state2,cn=1	BF.split18	BICF2P706211	BICF2P778313
chr18:46521374-46565444	18	46521374	46565444	numsnp=5	44071	state2,cn=1	BF.split21	BICF2P706211	BICF2P778313
chr18:46521374-46565444	18	46521374	46565444	numsnp=5	44071	state2,cn=1	BF.split23	BICF2P706211	BICF2P778313
chr18:46521374-46565444	18	46521374	46565444	numsnp=5	44071	state2,cn=1	BF.split41	BICF2P706211	BICF2P778313
chr18:46521374-46600419	18	46521374	46600419	numsnp=9	79046	state2,cn=1	BF.split9 s	BICF2P706211	BICF2P902032
chr18:46550101-46565444	18	46550101	46565444	numsnp=3	15344	state2,cn=1	BF.split27	BICF2P439638	BICF2P778313
chr19:7117822-7315927	19	7117822	7315927	numsnp=16	198106	state2,cn=1	BF.split40	BICF2P1420604	BICF2P967314
chr19:8016397-8048390	19	8016397	8048390	numsnp=4	31994	state2,cn=1	BF.split27	BICF2S23013141	BICF2S23213597
chr19:19415757-19478096	19	19415757	19478096	numsnp=4	62340	state5,cn=3	BF.split40	TIGRP2P259952_rs9252098	TIGRP2P260058_rs8547159
chr19:20200223-20237246	19	20200223	20237246	numsnp=4	37024	state5,cn=3	BF.split2 s	BICF2G63042850	BICF2G63042872
chr19:20200223-20237246	19	20200223	20237246	numsnp=4	37024	state5,cn=3	BF.split4 s	BICF2G63042850	BICF2G63042872
chr19:20200223-20237246	19	20200223	20237246	numsnp=4	37024	state5,cn=3	BF.split44	BICF2G63042850	BICF2G63042872
chr19:20200223-20272329	19	20200223	20272329	numsnp=7	72107	state5,cn=3	BF.split27	BICF2G63042850	BICF2G63042904
chr20:48516540-48566669	20	48516540	48566669	numsnp=4	50130	state2,cn=1	BF.split21	BICF2P558625	BICF2P873039
chr20:53201040-53285579	20	53201040	53285579	numsnp=7	84540	state5,cn=3	BF.split4 s	BICF2P170866	BICF2G630446823
chr20:53248043-53285579	20	53248043	53285579	numsnp=5	37537	state5,cn=3	BF.split37	BICF2P1229497	BICF2G630446823
chr20:56947851-56987434	20	56947851	56987434	numsnp=6	39584	state2,cn=1	BF.split21	BICF2P108587	BICF2P1189659
chr20:56947851-56987434	20	56947851	56987434	numsnp=6	39584	state2,cn=1	BF.split26	BICF2P108587	BICF2P1189659
chr20:56947851-57131538	20	56947851	57131538	numsnp=18	183688	state2,cn=1	BF.split27	BICF2P108587	BICF2P1291146
chr20:56947851-57412903	20	56947851	57412903	numsnp=37	465053	state2,cn=1	BF.split19	BICF2P108587	BICF2G630445205
chr20:56947851-57412903	20	56947851	57412903	numsnp=37	465053	state2,cn=1	BF.split34	BICF2P108587	BICF2G630445205
chr20:56947851-57814567	20	56947851	57814567	numsnp=70	866717	state2,cn=1	BF.split40	BICF2P108587	BICF2G630444931
chr20:56969834-56987434	20	56969834	56987434	numsnp=3	17601	state2,cn=1	BF.split4 s	BICF2P1081195	BICF2P1189659
chr20:57062612-57236434	20	57062612	57236434	numsnp=16	173823	state2,cn=1	BF.split21	BICF2P251800	BICF2G630445226
chr20:57062612-57412903	20	57062612	57412903	numsnp=26	350292	state2,cn=1	BF.split26	BICF2P251800	BICF2G630445205
chr20:57179919-57236434	20	57179919	57236434	numsnp=6	56516	state2,cn=1	BF.split15	BICF2P808157	BICF2G630445226
chr20:57179919-57236434	20	57179919	57236434	numsnp=6	56516	state2,cn=1	BF.split39	BICF2P808157	BICF2G630445226
chr20:57179919-57236434	20	57179919	57236434	numsnp=6	56516	state2,cn=1	BF.split43	BICF2P808157	BICF2G630445226
chr20:57179919-57236434	20	57179919	57236434	numsnp=6	56516	state2,cn=1	BF.split44	BICF2P808157	BICF2G630445226
chr20:57179919-57318119	20	57179919	57318119	numsnp=10	138201	state2,cn=1	BF.split23	BICF2P808157	BICF2P111889
chr20:57179919-57318119	20	57179919	57318119	numsnp=10	138201	state2,cn=1	BF.split9 s	BICF2P808157	BICF2P111889
chr20:57209381-57318119	20	57209381	57318119	numsnp=8	108739	state2,cn=1	BF.split27	BICF2P583831	BICF2P111889
chr20:57318119-57412903	20	57318119	57412903	numsnp=7	94785	state2,cn=1	BF.split16	BICF2P111889	BICF2G630445205
chr20:57318119-57412903	20	57318119	57412903	numsnp=7	94785	state2,cn=1	BF.split18	BICF2P111889	BICF2G630445205
chr20:57318119-57412903	20	57318119	57412903	numsnp=7	94785	state2,cn=1	BF.split44	BICF2P111889	BICF2G630445205
chr20:57387702-57412903	20	57387702	57412903	numsnp=3	25202	state2,cn=1	BF.split37	BICF2G630445207	BICF2G630445205
chr20:57387702-57412903	20	57387702	57412903	numsnp=3	25202	state2,cn=1	BF.split39	BICF2G630445207	BICF2G630445205
chr20:57387702-57412903	20	57387702	57412903	numsnp=3	25202	state2,cn=1	BF.split4 s	BICF2G630445207	BICF2G630445205
chr20:57387702-57412903	20	57387702	57412903	numsnp=3	25202	state2,cn=1	BF.split46	BICF2G630445207	BICF2G630445205
chr20:57387702-57412903	20	57387702	57412903	numsnp=3	25202	state2,cn=1	BF.split6 s	BICF2G630445207	BICF2G630445205
chr20:57675238-57799619	20	57675238	57799619	numsnp=11	124382	state2,cn=1	BF.split46	BICF2S2352077	BICF2P1316344
chr20:57734794-58034428	20	57734794	58034428	numsnp=25	299635	state2,cn=1	BF.split44	BICF2G630444971	BICF2P286756
chr20:57758412-57799619	20	57758412	57799619	numsnp=5	41208	state2,cn=1	BF.split19	BICF2G630444946	BICF2P1316344
chr21:30553131-30646849	21	30553131	30646849	numsnp=5	93719	state5,cn=3	BF.split35	BICF2P1385016	TIGRP2P284012_rs8506929
chr21:30597639-30621562	21	30597639	30621562	numsnp=3	23924	state5,cn=3	BF.split2 s	BICF2P1217007	TIGRP2P283923_rs8529210
chr21:30597639-30621562	21	30597639	30621562	numsnp=3	23924	state5,cn=3	BF.split21	BICF2P1217007	TIGRP2P283923_rs8529210
chr21:30597639-30621562	21	30597639	30621562	numsnp=3	23924	state5,cn=3	BF.split27	BICF2P1217007	TIGRP2P283923_rs8529210
chr21:30597639-30621562	21	30597639	30621562	numsnp=3	23924	state5,cn=3	BF.split37	BICF2P1217007	TIGRP2P283923_rs8529210
chr21:30597639-30621562	21	30597639	30621562	numsnp=3	23924	state5,cn=3	BF.split4 s	BICF2P1217007	TIGRP2P283923_rs8529210
chr21:30597639-30621562	21	30597639	30621562	numsnp=3	23924	state5,cn=3	BF.split6 s	BICF2P1217007	TIGRP2P283923_rs8529210
chr21:30597639-30646849	21	30597639	30646849	numsnp=4	49211	state5,cn=3	BF.split26	BICF2P1217007	TIGRP2P284012_rs8506929
chr21:30597639-30646849	21	30597639	30646849	numsnp=4	49211	state5,cn=3	BF.split28	BICF2P1217007	TIGRP2P284012_rs8506929
chr22:11767940-11868616	22	11767940	11868616	numsnp=9	100677	state2,cn=1	BF.split2 s	BICF2S23254684	BICF2G630318282
chr22:51294877-51312761	22	51294877	51312761	numsnp=3	17885	state5,cn=3	BF.split17	BICF2P1074098	BICF2S23511172
chr22:51294877-51312761	22	51294877	51312761	numsnp=3	17885	state5,cn=3	BF.split2 s	BICF2P1074098	BICF2S23511172
chr22:51294877-51312761	22	51294877	51312761	numsnp=3	17885	state5,cn=3	BF.split21	BICF2P1074098	BICF2S23511172
chr22:51294877-51312761	22	51294877	51312761	numsnp=3	17885	state5,cn=3	BF.split24	BICF2P1074098	BICF2S23511172
chr22:51294877-51312761	22	51294877	51312761	numsnp=3	17885	state5,cn=3	BF.split39	BICF2P1074098	BICF2S23511172
chr22:51294877-51312761	22	51294877	51312761	numsnp=3	17885	state5,cn=3	BF.split43	BICF2P1074098	BICF2S23511172
chr22:51294877-51312761	22	51294877	51312761	numsnp=3	17885	state5,cn=3	BF.split44	BICF2P1074098	BICF2S23511172
chr22:51294877-51312761	22	51294877	51312761	numsnp=3	17885	state5,cn=3	BF.split46	BICF2P1074098	BICF2S23511172
chr22:51294877-51312761	22	51294877	51312761	numsnp=3	17885	state5,cn=3	BF.split6 s	BICF2P1074098	BICF2S23511172
chr22:51294877-51312761	22	51294877	51312761	numsnp=3	17885	state5,cn=3	BF.split9 s	BICF2P1074098	BICF2S23511172
chr23:20529371-20657123	23	20529371	20657123	numsnp=8	127753	state5,cn=3	BF.split18	BICF2G630381500	BICF2G630381332
chr23:20529371-20657123	23	20529371	20657123	numsnp=8	127753	state5,cn=3	BF.split28	BICF2G630381500	BICF2G630381332
chr23:20529371-20657123	23	20529371	20657123	numsnp=8	127753	state5,cn=3	BF.split33	BICF2G630381500	BICF2G630381332
chr23:20529371-20716930	23	20529371	20716930	numsnp=12	187560	state5,cn=3	BF.split16	BICF2G630381500	BICF2S24110685
chr23:20529371-20716930	23	20529371	20716930	numsnp=12	187560	state5,cn=3	BF.split21	BICF2G630381500	BICF2S24110685
chr23:20529371-20716930	23	20529371	20716930	numsnp=12	187560	state5,cn=3	BF.split23	BICF2G630381500	BICF2S24110685
chr23:20529371-20716930	23	20529371	20716930	numsnp=12	187560	state5,cn=3	BF.split26	BICF2G630381500	BICF2S24110685
chr23:20529371-20716930	23	20529371	20716930	numsnp=12	187560	state5,cn=3	BF.split45	BICF2G630381500	BICF2S24110685
chr23:20529371-20716930	23	20529371	20716930	numsnp=12	187560	state5,cn=3	BF.split46	BICF2G630381500	BICF2S24110685
chr23:20529371-20716930	23	20529371	20716930	numsnp=12	187560	state5,cn=3	BF.split9 s	BICF2G630381500	BICF2S24110685
chr23:20548123-20716930	23	20548123	20716930	numsnp=11	168808	state5,cn=3	BF.split17	BICF2G630381491	BICF2S24110685
chr23:20606829-20716930	23	20606829	20716930	numsnp=8	110102	state5,cn=3	BF.split39	TIGRP2P302625_rs8852004	BICF2S24110685
chr23:52156177-52159756	23	52156177	52159756	numsnp=3	3580	state2,cn=1	BF.split19	BICF2S23426173	BICF2S23425789
chr23:52156177-52159756	23	52156177	52159756	numsnp=3	3580	state2,cn=1	BF.split27	BICF2S23426173	BICF2S23425789
chr23:52156177-52159756	23	52156177	52159756	numsnp=3	3580	state2,cn=1	BF.split43	BICF2S23426173	BICF2S23425789
chr23:52156177-52178206	23	52156177	52178206	numsnp=5	22030	state2,cn=1	BF.split17	BICF2S23426173	BICF2S23751169
chr23:52156177-52265982	23	52156177	52265982	numsnp=13	109806	state2,cn=1	BF.split44	BICF2S23426173	G1240f13S213
chr24:45718712-46076223	24	45718712	46076223	numsnp=31	357512	state2,cn=1	BF.split19	BICF2P201786	BICF2P768554
chr24:46547771-46580009	24	46547771	46580009	numsnp=6	32239	state2,cn=1	BF.split26	BICF2G630496037	BICF2G630495986
chr24:46547771-46580009	24	46547771	46580009	numsnp=6	32239	state2,cn=1	BF.split41	BICF2G630496037	BICF2G630495986
chr24:46547771-46580009	24	46547771	46580009	numsnp=6	32239	state2,cn=1	BF.split9 s	BICF2G630496037	BICF2G630495986
chr24:46547771-46672960	24	46547771	46672960	numsnp=13	125190	state2,cn=1	BF.split19	BICF2G630496037	TIGRP2P322463_rs8687197
chr24:46547771-46672960	24	46547771	46672960	numsnp=13	125190	state2,cn=1	BF.split23	BICF2G630496037	TIGRP2P322463_rs8687197
chr24:46547771-46672960	24	46547771	46672960	numsnp=13	125190	state2,cn=1	BF.split27	BICF2G630496037	TIGRP2P322463_rs8687197
chr24:46553990-46672960	24	46553990	46672960	numsnp=12	118971	state2,cn=1	BF.split18	BICF2G630496022	TIGRP2P322463_rs8687197
chr24:46553990-46672960	24	46553990	46672960	numsnp=12	118971	state2,cn=1	BF.split40	BICF2G630496022	TIGRP2P322463_rs8687197
chr24:46606463-46672960	24	46606463	46672960	numsnp=6	66498	state2,cn=1	BF.split16	TIGRP2P322436_rs8701636	TIGRP2P322463_rs8687197
chr24:46606463-46672960	24	46606463	46672960	numsnp=6	66498	state2,cn=1	BF.split34	TIGRP2P322436_rs8701636	TIGRP2P322463_rs8687197
chr24:46606463-46672960	24	46606463	46672960	numsnp=6	66498	state2,cn=1	BF.split43	TIGRP2P322436_rs8701636	TIGRP2P322463_rs8687197
chr24:46606463-46672960	24	46606463	46672960	numsnp=6	66498	state2,cn=1	BF.split46	TIGRP2P322436_rs8701636	TIGRP2P322463_rs8687197
chr24:46862780-46982353	24	46862780	46982353	numsnp=16	119574	state2,cn=1	BF.split18	BICF2G630495724	BICF2G630495553
chr24:46974565-47128097	24	46974565	47128097	numsnp=15	153533	state2,cn=1	BF.split27	BICF2P940972	BICF2P1177117
chr24:46974565-47128097	24	46974565	47128097	numsnp=15	153533	state2,cn=1	BF.split40	BICF2P940972	BICF2P1177117
chr24:46974565-47149786	24	46974565	47149786	numsnp=16	175222	state2,cn=1	BF.split15	BICF2P940972	BICF2P516512
chr24:46974565-47149786	24	46974565	47149786	numsnp=16	175222	state2,cn=1	BF.split26	BICF2P940972	BICF2P516512
chr24:46974565-47149786	24	46974565	47149786	numsnp=16	175222	state2,cn=1	BF.split41	BICF2P940972	BICF2P516512
chr24:47000283-47024956	24	47000283	47024956	numsnp=4	24674	state1,cn=0	BF.split9 s	BICF2G630495540	BICF2G630495517
chr24:47000283-47058943	24	47000283	47058943	numsnp=5	58661	state1,cn=0	BF.split16	BICF2G630495540	BICF2G630495500
chr24:47000283-47058943	24	47000283	47058943	numsnp=5	58661	state1,cn=0	BF.split18	BICF2G630495540	BICF2G630495500
chr24:47000283-47058943	24	47000283	47058943	numsnp=5	58661	state1,cn=0	BF.split19	BICF2G630495540	BICF2G630495500
chr24:47000283-47058943	24	47000283	47058943	numsnp=5	58661	state1,cn=0	BF.split23	BICF2G630495540	BICF2G630495500
chr24:47000283-47058943	24	47000283	47058943	numsnp=5	58661	state1,cn=0	BF.split43	BICF2G630495540	BICF2G630495500
chr24:47000283-47064507	24	47000283	47064507	numsnp=6	64225	state2,cn=1	BF.split28	BICF2G630495540	BICF2S23654235
chr24:47000283-47064507	24	47000283	47064507	numsnp=6	64225	state2,cn=1	BF.split39	BICF2G630495540	BICF2S23654235
chr24:47000283-47064507	24	47000283	47064507	numsnp=6	64225	state2,cn=1	BF.split4 s	BICF2G630495540	BICF2S23654235
chr24:47000283-47128097	24	47000283	47128097	numsnp=11	127815	state2,cn=1	BF.split21	BICF2G630495540	BICF2P1177117
chr24:47000283-47149786	24	47000283	47149786	numsnp=12	149504	state2,cn=1	BF.split34	BICF2G630495540	BICF2P516512
chr24:47020202-47128097	24	47020202	47128097	numsnp=9	107896	state2,cn=1	BF.split17	BICF2G630495530	BICF2P1177117
chr24:47058943-47107013	24	47058943	47107013	numsnp=5	48071	state2,cn=1	BF.split9 s	BICF2G630495500	TIGRP2P322718_rs8542775
chr24:47064507-47107013	24	47064507	47107013	numsnp=4	42507	state2,cn=1	BF.split16	BICF2S23654235	TIGRP2P322718_rs8542775
chr24:47064507-47107013	24	47064507	47107013	numsnp=4	42507	state2,cn=1	BF.split23	BICF2S23654235	TIGRP2P322718_rs8542775
chr24:47064507-47128097	24	47064507	47128097	numsnp=6	63591	state2,cn=1	BF.split19	BICF2S23654235	BICF2P1177117
chr24:47064507-47149786	24	47064507	47149786	numsnp=7	85280	state2,cn=1	BF.split18	BICF2S23654235	BICF2P516512
chr24:47064507-47149786	24	47064507	47149786	numsnp=7	85280	state2,cn=1	BF.split43	BICF2S23654235	BICF2P516512
chr24:47253612-47291094	24	47253612	47291094	numsnp=6	37483	state2,cn=1	BF.split19	BICF2P443751	BICF2P1399806
chr24:47355623-47369578	24	47355623	47369578	numsnp=3	13956	state5,cn=3	BF.split28	BICF2P526075	TIGRP2P322834_rs8889213
chr24:47484099-47561291	24	47484099	47561291	numsnp=7	77193	state2,cn=1	BF.split19	BICF2P317314	BICF2S23347652
chr24:47484099-47561291	24	47484099	47561291	numsnp=7	77193	state2,cn=1	BF.split27	BICF2P317314	BICF2S23347652
chr24:47484099-47561291	24	47484099	47561291	numsnp=7	77193	state2,cn=1	BF.split34	BICF2P317314	BICF2S23347652
chr24:47484099-47561291	24	47484099	47561291	numsnp=7	77193	state2,cn=1	BF.split46	BICF2P317314	BICF2S23347652
chr24:47497209-47537110	24	47497209	47537110	numsnp=4	39902	state2,cn=1	BF.split26	BICF2P697487	BICF2S2366906
chr24:47497209-47561291	24	47497209	47561291	numsnp=6	64083	state2,cn=1	BF.split2 s	BICF2P697487	BICF2S23347652
chr25:25863543-25937919	25	25863543	25937919	numsnp=5	74377	state5,cn=3	BF.split2 s	TIGRP2P327700_rs8648670	BICF2P1001250
chr25:25886759-25937919	25	25886759	25937919	numsnp=4	51161	state5,cn=3	BF.split16	G1290f21S220	BICF2P1001250
chr25:27326337-27327319	25	27326337	27327319	numsnp=3	983	state2,cn=1	BF.split21	BICF2G63096049	BICF2G63096052
chr25:48611803-48639816	25	48611803	48639816	numsnp=4	28014	state2,cn=1	BF.split28	BICF2P792692	BICF2G630158522
chr25:48611803-48662322	25	48611803	48662322	numsnp=6	50520	state2,cn=1	BF.split23	BICF2P792692	BICF2G630158483
chr25:48611803-48662322	25	48611803	48662322	numsnp=6	50520	state2,cn=1	BF.split40	BICF2P792692	BICF2G630158483
chr25:50061338-50174384	25	50061338	50174384	numsnp=6	113047	state5,cn=3	BF.split43	BICF2P236596	BICF2P689448
chr25:50061338-50289519	25	50061338	50289519	numsnp=10	228182	state5,cn=3	BF.split28	BICF2P236596	TIGRP2P335296_rs9184577
chr25:50061338-50299773	25	50061338	50299773	numsnp=11	238436	state5,cn=3	BF.split23	BICF2P236596	BICF2P1062573
chr25:50299773-50508290	25	50299773	50508290	numsnp=18	208518	state2,cn=1	BF.split28	BICF2P1062573	BICF2G630156122
chr25:50314369-50367207	25	50314369	50367207	numsnp=4	52839	state2,cn=1	BF.split18	TIGRP2P335336_rs9166663	BICF2G630156348
chr25:50314369-50482865	25	50314369	50482865	numsnp=15	168497	state2,cn=1	BF.split21	TIGRP2P335336_rs9166663	BICF2G630156146
chr25:50314369-50508290	25	50314369	50508290	numsnp=17	193922	state2,cn=1	BF.split23	TIGRP2P335336_rs9166663	BICF2G630156122
chr25:50314369-50545756	25	50314369	50545756	numsnp=20	231388	state2,cn=1	BF.split43	TIGRP2P335336_rs9166663	BICF2G630156082
chr25:50314369-50568415	25	50314369	50568415	numsnp=22	254047	state2,cn=1	BF.split40	TIGRP2P335336_rs9166663	BICF2G630156064
chr25:50345174-50482865	25	50345174	50482865	numsnp=13	137692	state2,cn=1	BF.split6 s	BICF2G630156379	BICF2G630156146
chr25:50345174-50786743	25	50345174	50786743	numsnp=23	441570	state2,cn=1	BF.split44	BICF2G630156379	BICF2G630190334
chr26:28202008-28215276	26	28202008	28215276	numsnp=3	13269	state5,cn=3	BF.split21	BICF2P520032	BICF2S2341340
chr26:28202008-28215276	26	28202008	28215276	numsnp=3	13269	state5,cn=3	BF.split24	BICF2P520032	BICF2S2341340
chr26:38004560-38049729	26	38004560	38049729	numsnp=5	45170	state2,cn=1	BF.split39	BICF2G630193099	BICF2G630193056
chr27:943796-993408	27	943796	993408	numsnp=6	49613	state5,cn=3	BF.split23	BICF2P880795	TIGRP2P347800_rs8952643
chr27:2869179-2904028	27	2869179	2904028	numsnp=4	34850	state2,cn=1	BF.split15	BICF2G630138664	BICF2G630138694
chr27:2869179-2904028	27	2869179	2904028	numsnp=4	34850	state2,cn=1	BF.split41	BICF2G630138664	BICF2G630138694
chr27:25695551-25791536	27	25695551	25791536	numsnp=9	95986	state2,cn=1	BF.split16	TIGRP2P351680_rs8666747	BICF2G630150942
chr27:25695551-25791536	27	25695551	25791536	numsnp=9	95986	state2,cn=1	BF.split17	TIGRP2P351680_rs8666747	BICF2G630150942
chr27:25695551-25791536	27	25695551	25791536	numsnp=9	95986	state2,cn=1	BF.split23	TIGRP2P351680_rs8666747	BICF2G630150942
chr27:25695551-25791536	27	25695551	25791536	numsnp=9	95986	state2,cn=1	BF.split24	TIGRP2P351680_rs8666747	BICF2G630150942
chr27:25695551-25791536	27	25695551	25791536	numsnp=9	95986	state2,cn=1	BF.split26	TIGRP2P351680_rs8666747	BICF2G630150942
chr27:25695551-25791536	27	25695551	25791536	numsnp=9	95986	state2,cn=1	BF.split43	TIGRP2P351680_rs8666747	BICF2G630150942
chr27:25695551-25810881	27	25695551	25810881	numsnp=11	115331	state2,cn=1	BF.split2 s	TIGRP2P351680_rs8666747	BICF2G630150974
chr27:25695551-25810881	27	25695551	25810881	numsnp=11	115331	state2,cn=1	BF.split27	TIGRP2P351680_rs8666747	BICF2G630150974
chr27:25695551-25810881	27	25695551	25810881	numsnp=11	115331	state2,cn=1	BF.split37	TIGRP2P351680_rs8666747	BICF2G630150974
chr27:25695551-25810881	27	25695551	25810881	numsnp=11	115331	state2,cn=1	BF.split39	TIGRP2P351680_rs8666747	BICF2G630150974
chr27:25695551-25810881	27	25695551	25810881	numsnp=11	115331	state2,cn=1	BF.split40	TIGRP2P351680_rs8666747	BICF2G630150974
chr27:25695551-25810881	27	25695551	25810881	numsnp=11	115331	state2,cn=1	BF.split41	TIGRP2P351680_rs8666747	BICF2G630150974
chr27:25695551-25810881	27	25695551	25810881	numsnp=11	115331	state2,cn=1	BF.split44	TIGRP2P351680_rs8666747	BICF2G630150974
chr27:25695551-25810881	27	25695551	25810881	numsnp=11	115331	state2,cn=1	BF.split6 s	TIGRP2P351680_rs8666747	BICF2G630150974
chr27:25751396-25810881	27	25751396	25810881	numsnp=10	59486	state2,cn=1	BF.split19	BICF2G630150819	BICF2G630150974
chr27:25751396-25810881	27	25751396	25810881	numsnp=10	59486	state2,cn=1	BF.split21	BICF2G630150819	BICF2G630150974
chr27:25751396-25810881	27	25751396	25810881	numsnp=10	59486	state2,cn=1	BF.split28	BICF2G630150819	BICF2G630150974
chr27:25751396-25810881	27	25751396	25810881	numsnp=10	59486	state2,cn=1	BF.split4 s	BICF2G630150819	BICF2G630150974
chr28:40299547-40325378	28	40299547	40325378	numsnp=3	25832	state1,cn=0	BF.split16	BICF2G630108823	BICF2P319846
chr28:40299547-40325378	28	40299547	40325378	numsnp=3	25832	state1,cn=0	BF.split18	BICF2G630108823	BICF2P319846
chr28:40299547-40325378	28	40299547	40325378	numsnp=3	25832	state1,cn=0	BF.split28	BICF2G630108823	BICF2P319846
chr28:40299547-40354190	28	40299547	40354190	numsnp=6	54644	state1,cn=0	BF.split23	BICF2G630108823	BICF2S23213193
chr28:40299547-40514129	28	40299547	40514129	numsnp=21	214583	state2,cn=1	BF.split21	BICF2G630108823	BICF2P1247243
chr28:40317728-40354190	28	40317728	40354190	numsnp=5	36463	state1,cn=0	BF.split19	BICF2S2395766	BICF2S23213193
chr28:40370187-40562069	28	40370187	40562069	numsnp=18	191883	state2,cn=1	BF.split19	BICF2G630108870	BICF2G630109107
chr28:40687247-40866864	28	40687247	40866864	numsnp=14	179618	state2,cn=1	BF.split44	BICF2G630109407	BICF2S23647581
chr28:40715077-40730141	28	40715077	40730141	numsnp=3	15065	state2,cn=1	BF.split2 s	BICF2P1025903	BICF2G63064629
chr28:40715077-40730141	28	40715077	40730141	numsnp=3	15065	state2,cn=1	BF.split6 s	BICF2P1025903	BICF2G63064629
chr28:40715077-40730141	28	40715077	40730141	numsnp=3	15065	state2,cn=1	BF.split9 s	BICF2P1025903	BICF2G63064629
chr28:40715077-40839368	28	40715077	40839368	numsnp=10	124292	state2,cn=1	BF.split19	BICF2P1025903	BICF2G63064495
chr28:40715077-40866864	28	40715077	40866864	numsnp=12	151788	state2,cn=1	BF.split4 s	BICF2P1025903	BICF2S23647581
chr28:40715077-41058823	28	40715077	41058823	numsnp=26	343747	state2,cn=1	BF.split21	BICF2P1025903	BICF2P609951
chr28:40850522-40903620	28	40850522	40903620	numsnp=4	53099	state1,cn=0	BF.split19	BICF2S23417373	BICF2P672763
chr28:40961542-41058823	28	40961542	41058823	numsnp=9	97282	state2,cn=1	BF.split9 s	BICF2S2443300	BICF2P609951
chr28:40993026-41020381	28	40993026	41020381	numsnp=4	27356	state2,cn=1	BF.split2 s	BICF2P111596	BICF2P124519
chr28:40993026-41020381	28	40993026	41020381	numsnp=4	27356	state2,cn=1	BF.split44	BICF2P111596	BICF2P124519
chr28:40993026-41045575	28	40993026	41045575	numsnp=5	52550	state1,cn=0	BF.split40	BICF2P111596	BICF2S23253219
chr28:40993026-41045575	28	40993026	41045575	numsnp=5	52550	state1,cn=0	BF.split41	BICF2P111596	BICF2S23253219
chr28:40993026-41045575	28	40993026	41045575	numsnp=5	52550	state1,cn=0	BF.split43	BICF2P111596	BICF2S23253219
chr28:40993026-41058823	28	40993026	41058823	numsnp=6	65798	state2,cn=1	BF.split15	BICF2P111596	BICF2P609951
chr28:40993026-41058823	28	40993026	41058823	numsnp=6	65798	state2,cn=1	BF.split16	BICF2P111596	BICF2P609951
chr28:40993026-41058823	28	40993026	41058823	numsnp=6	65798	state2,cn=1	BF.split17	BICF2P111596	BICF2P609951
chr28:40993026-41058823	28	40993026	41058823	numsnp=6	65798	state2,cn=1	BF.split18	BICF2P111596	BICF2P609951
chr28:40993026-41058823	28	40993026	41058823	numsnp=6	65798	state2,cn=1	BF.split19	BICF2P111596	BICF2P609951
chr28:40993026-41058823	28	40993026	41058823	numsnp=6	65798	state2,cn=1	BF.split23	BICF2P111596	BICF2P609951
chr28:40993026-41058823	28	40993026	41058823	numsnp=6	65798	state2,cn=1	BF.split27	BICF2P111596	BICF2P609951
chr28:40993026-41058823	28	40993026	41058823	numsnp=6	65798	state2,cn=1	BF.split46	BICF2P111596	BICF2P609951
chr28:41018541-41058823	28	41018541	41058823	numsnp=4	40283	state2,cn=1	BF.split26	BICF2S23158770	BICF2P609951
chr30:23765880-23826724	30	23765880	23826724	numsnp=7	60845	state2,cn=1	BF.split34	BICF2G630403638	BICF2G630403633
chr30:27693934-27841220	30	27693934	27841220	numsnp=15	147287	state2,cn=1	BF.split34	BICF2P792471	BICF2P1031425
chr30:38925569-39105672	30	38925569	39105672	numsnp=17	180104	state5,cn=3	BF.split39	BICF2G630394802	BICF2G630394672
chr30:39238620-39335352	30	39238620	39335352	numsnp=9	96733	state2,cn=1	BF.split18	BICF2G630394410	BICF2P1457950
chr30:39238620-39335352	30	39238620	39335352	numsnp=9	96733	state2,cn=1	BF.split28	BICF2G630394410	BICF2P1457950
chr30:39238620-39335352	30	39238620	39335352	numsnp=9	96733	state2,cn=1	BF.split41	BICF2G630394410	BICF2P1457950
chr30:39238620-39335352	30	39238620	39335352	numsnp=9	96733	state2,cn=1	BF.split6 s	BICF2G630394410	BICF2P1457950
chr30:39266383-39335352	30	39266383	39335352	numsnp=7	68970	state2,cn=1	BF.split39	BICF2P1261643	BICF2P1457950
chr30:39280736-39335352	30	39280736	39335352	numsnp=6	54617	state2,cn=1	BF.split15	BICF2S22960447	BICF2P1457950
chr30:39280736-39335352	30	39280736	39335352	numsnp=6	54617	state2,cn=1	BF.split24	BICF2S22960447	BICF2P1457950
chr31:37790558-37879054	31	37790558	37879054	numsnp=9	88497	state2,cn=1	BF.split15	BICF2P1229404	BICF2S23115109
chr31:37790558-37879054	31	37790558	37879054	numsnp=9	88497	state2,cn=1	BF.split41	BICF2P1229404	BICF2S23115109
chr31:37807387-37879054	31	37807387	37879054	numsnp=7	71668	state2,cn=1	BF.split16	BICF2G630742975	BICF2S23115109
chr31:37845947-37879054	31	37845947	37879054	numsnp=3	33108	state2,cn=1	BF.split4 s	BICF2G630743039	BICF2S23115109
chr31:38012346-38293227	31	38012346	38293227	numsnp=19	280882	state2,cn=1	BF.split15	BICF2P969976	BICF2P474081
chr31:38012346-38293227	31	38012346	38293227	numsnp=19	280882	state2,cn=1	BF.split2 s	BICF2P969976	BICF2P474081
chr31:38012346-38293227	31	38012346	38293227	numsnp=19	280882	state2,cn=1	BF.split27	BICF2P969976	BICF2P474081
chr31:38012346-38293227	31	38012346	38293227	numsnp=19	280882	state2,cn=1	BF.split41	BICF2P969976	BICF2P474081
chr31:38012346-38293227	31	38012346	38293227	numsnp=19	280882	state2,cn=1	BF.split44	BICF2P969976	BICF2P474081
chr31:38012346-38293227	31	38012346	38293227	numsnp=19	280882	state2,cn=1	BF.split46	BICF2P969976	BICF2P474081
chr31:38090294-38148342	31	38090294	38148342	numsnp=6	58049	state2,cn=1	BF.split23	BICF2G630743227	BICF2P946213
chr31:38795411-38986689	31	38795411	38986689	numsnp=16	191279	state2,cn=1	BF.split15	BICF2S23711829	BICF2G630199814
chr31:38795411-38986689	31	38795411	38986689	numsnp=16	191279	state2,cn=1	BF.split17	BICF2S23711829	BICF2G630199814
chr31:38795411-39017391	31	38795411	39017391	numsnp=19	221981	state2,cn=1	BF.split27	BICF2S23711829	BICF2G630199890
chr31:38795411-39017391	31	38795411	39017391	numsnp=19	221981	state2,cn=1	BF.split46	BICF2S23711829	BICF2G630199890
chr31:38901096-38986689	31	38901096	38986689	numsnp=8	85594	state2,cn=1	BF.split2 s	BICF2G630199722	BICF2G630199814
chr31:38901096-38986689	31	38901096	38986689	numsnp=8	85594	state2,cn=1	BF.split44	BICF2G630199722	BICF2G630199814
chr31:38986689-39017391	31	38986689	39017391	numsnp=4	30703	state2,cn=1	BF.split9 s	BICF2G630199814	BICF2G630199890
chr31:38986689-39023547	31	38986689	39023547	numsnp=5	36859	state2,cn=1	BF.split26	BICF2G630199814	BICF2G630199895
chr31:39264290-39315810	31	39264290	39315810	numsnp=5	51521	state2,cn=1	BF.split15	BICF2P1275633	BICF2G630200283
chr31:39264290-39315810	31	39264290	39315810	numsnp=5	51521	state2,cn=1	BF.split2 s	BICF2P1275633	BICF2G630200283
chr31:39264290-39315810	31	39264290	39315810	numsnp=5	51521	state2,cn=1	BF.split21	BICF2P1275633	BICF2G630200283
chr31:39264290-39315810	31	39264290	39315810	numsnp=5	51521	state2,cn=1	BF.split27	BICF2P1275633	BICF2G630200283
chr31:39264290-39492996	31	39264290	39492996	numsnp=19	228707	state2,cn=1	BF.split19	BICF2P1275633	BICF2P485223
chr31:39418890-39492996	31	39418890	39492996	numsnp=7	74107	state2,cn=1	BF.split15	BICF2G630200372	BICF2P485223
chr31:39418890-39492996	31	39418890	39492996	numsnp=7	74107	state2,cn=1	BF.split41	BICF2G630200372	BICF2P485223
chr31:39454796-39478762	31	39454796	39478762	numsnp=3	23967	state2,cn=1	BF.split26	BICF2P944797	BICF2G630200411
chr31:39454796-39492996	31	39454796	39492996	numsnp=5	38201	state2,cn=1	BF.split27	BICF2P944797	BICF2P485223
chr31:39454796-39492996	31	39454796	39492996	numsnp=5	38201	state2,cn=1	BF.split9 s	BICF2P944797	BICF2P485223
chr32:35695767-35768613	32	35695767	35768613	numsnp=5	72847	state2,cn=1	BF.split41	BICF2P1196676	BICF2S23039648
chr33:5300162-5378124	33	5300162	5378124	numsnp=7	77963	state5,cn=3	BF.split45	BICF2G630246063	BICF2S23448058
chr36:5304165-5371286	36	5304165	5371286	numsnp=5	67122	state2,cn=1	BF.split35	BICF2P529314	TIGRP2P416761_rs8856898
chr36:13554759-13722385	36	13554759	13722385	numsnp=15	167627	state2,cn=1	BF.split17	BICF2S23525314	BICF2S23116783
chr36:13554759-13965436	36	13554759	13965436	numsnp=37	410678	state2,cn=1	BF.split27	BICF2S23525314	BICF2P386260
chr36:13643437-13683959	36	13643437	13683959	numsnp=6	40523	state2,cn=1	BF.split46	BICF2S23622348	BICF2S23637222
chr36:13643437-13959147	36	13643437	13959147	numsnp=29	315711	state2,cn=1	BF.split39	BICF2S23622348	BICF2P1236668
chr36:13649606-13683959	36	13649606	13683959	numsnp=5	34354	state2,cn=1	BF.split40	BICF2P634930	BICF2S23637222
chr36:13649606-13683959	36	13649606	13683959	numsnp=5	34354	state2,cn=1	BF.split43	BICF2P634930	BICF2S23637222
chr36:13649606-13722385	36	13649606	13722385	numsnp=7	72780	state2,cn=1	BF.split33	BICF2P634930	BICF2S23116783
chr36:13649606-13722385	36	13649606	13722385	numsnp=7	72780	state2,cn=1	BF.split34	BICF2P634930	BICF2S23116783
chr36:13649606-13965436	36	13649606	13965436	numsnp=29	315831	state2,cn=1	BF.split35	BICF2P634930	BICF2P386260
chr36:13649606-13965436	36	13649606	13965436	numsnp=29	315831	state2,cn=1	BF.split41	BICF2P634930	BICF2P386260
chr36:13662025-13674617	36	13662025	13674617	numsnp=3	12593	state2,cn=1	BF.split23	BICF2P1308360	BICF2P283050
chr36:13662025-13674617	36	13662025	13674617	numsnp=3	12593	state2,cn=1	BF.split24	BICF2P1308360	BICF2P283050
chr36:13662025-13674617	36	13662025	13674617	numsnp=3	12593	state2,cn=1	BF.split28	BICF2P1308360	BICF2P283050
chr36:13662025-13722385	36	13662025	13722385	numsnp=6	60361	state2,cn=1	BF.split26	BICF2P1308360	BICF2S23116783
chr36:13683959-13735543	36	13683959	13735543	numsnp=4	51585	state5,cn=3	BF.split23	BICF2S23637222	BICF2S2348625
chr36:13704544-13796426	36	13704544	13796426	numsnp=8	91883	state5,cn=3	BF.split40	BICF2S23515988	BICF2S23244383
chr36:13704544-13796426	36	13704544	13796426	numsnp=8	91883	state5,cn=3	BF.split43	BICF2S23515988	BICF2S23244383
chr36:13735543-13796426	36	13735543	13796426	numsnp=6	60884	state5,cn=3	BF.split34	BICF2S2348625	BICF2S23244383
chr36:13742102-13830021	36	13742102	13830021	numsnp=7	87920	state1,cn=0	BF.split23	BICF2S23157920	BICF2P1438344
chr36:13912578-13959147	36	13912578	13959147	numsnp=5	46570	state2,cn=1	BF.split34	BICF2S23736605	BICF2P1236668
chr36:13912578-13959147	36	13912578	13959147	numsnp=5	46570	state2,cn=1	BF.split45	BICF2S23736605	BICF2P1236668
chr36:13912578-13965436	36	13912578	13965436	numsnp=6	52859	state2,cn=1	BF.split33	BICF2S23736605	BICF2P386260
chr36:13912578-13965436	36	13912578	13965436	numsnp=6	52859	state2,cn=1	BF.split46	BICF2S23736605	BICF2P386260
chr36:13912578-13986075	36	13912578	13986075	numsnp=7	73498	state2,cn=1	BF.split17	BICF2S23736605	BICF2P1307019
chr36:13928937-13965436	36	13928937	13965436	numsnp=4	36500	state2,cn=1	BF.split2 s	BICF2P908736	BICF2P386260
chr36:14095791-14265713	36	14095791	14265713	numsnp=10	169923	state2,cn=1	BF.split27	BICF2P684313	BICF2P694847
chr36:14181091-14250584	36	14181091	14250584	numsnp=7	69494	state2,cn=1	BF.split26	BICF2P611451	BICF2P1387579
chr36:14211947-14250584	36	14211947	14250584	numsnp=5	38638	state2,cn=1	BF.split15	BICF2P290941	BICF2P1387579
chr36:14211947-14250584	36	14211947	14250584	numsnp=5	38638	state2,cn=1	BF.split16	BICF2P290941	BICF2P1387579
chr36:14211947-14250584	36	14211947	14250584	numsnp=5	38638	state2,cn=1	BF.split17	BICF2P290941	BICF2P1387579
chr36:14211947-14250584	36	14211947	14250584	numsnp=5	38638	state2,cn=1	BF.split18	BICF2P290941	BICF2P1387579
chr36:14211947-14250584	36	14211947	14250584	numsnp=5	38638	state2,cn=1	BF.split19	BICF2P290941	BICF2P1387579
chr36:14211947-14250584	36	14211947	14250584	numsnp=5	38638	state2,cn=1	BF.split21	BICF2P290941	BICF2P1387579
chr36:14211947-14250584	36	14211947	14250584	numsnp=5	38638	state2,cn=1	BF.split40	BICF2P290941	BICF2P1387579
chr36:14211947-14250584	36	14211947	14250584	numsnp=5	38638	state2,cn=1	BF.split6 s	BICF2P290941	BICF2P1387579
chr36:14211947-14250584	36	14211947	14250584	numsnp=5	38638	state2,cn=1	BF.split9 s	BICF2P290941	BICF2P1387579
chr36:14211947-14265713	36	14211947	14265713	numsnp=6	53767	state2,cn=1	BF.split28	BICF2P290941	BICF2P694847
chr36:15666692-15706265	36	15666692	15706265	numsnp=4	39574	state2,cn=1	BF.split39	BICF2P992329	BICF2S23342386
chr36:15666692-15754892	36	15666692	15754892	numsnp=8	88201	state2,cn=1	BF.split45	BICF2P992329	BICF2P327793
chr36:15676354-15790250	36	15676354	15790250	numsnp=9	113897	state2,cn=1	BF.split46	BICF2S2314997	BICF2P1357298
chr36:15790250-15860340	36	15790250	15860340	numsnp=8	70091	state2,cn=1	BF.split17	BICF2P1357298	G1485f22S245
chr36:16115361-16272644	36	16115361	16272644	numsnp=12	157284	state5,cn=3	BF.split6 s	BICF2P1059115	BICF2P133005
chr36:16139977-16250967	36	16139977	16250967	numsnp=9	110991	state2,cn=1	BF.split27	TIGRP2P412392_rs8969957	TIGRP2P412407_rs8675412
chr36:16139977-16250967	36	16139977	16250967	numsnp=9	110991	state2,cn=1	BF.split46	TIGRP2P412392_rs8969957	TIGRP2P412407_rs8675412
chr36:16166406-16250967	36	16166406	16250967	numsnp=7	84562	state2,cn=1	BF.split41	BICF2P802274	TIGRP2P412407_rs8675412
chr36:16189091-16250967	36	16189091	16250967	numsnp=6	61877	state2,cn=1	BF.split9 s	TIGRP2P412400_rs8605990	TIGRP2P412407_rs8675412
chr36:16195586-16250967	36	16195586	16250967	numsnp=5	55382	state2,cn=1	BF.split35	BICF2S23746958	TIGRP2P412407_rs8675412
chr36:16226274-16250967	36	16226274	16250967	numsnp=3	24694	state2,cn=1	BF.split43	BICF2P1166863	TIGRP2P412407_rs8675412
chr37:30058014-30112232	37	30058014	30112232	numsnp=6	54219	state2,cn=1	BF.split19	BICF2G630135358	BICF2P640682
chr37:30058014-30112232	37	30058014	30112232	numsnp=6	54219	state2,cn=1	BF.split27	BICF2G630135358	BICF2P640682
chr38:4831886-4889417	38	4831886	4889417	numsnp=5	57532	state2,cn=1	BF.split40	BICF2S2293688	BICF2S23237658
chr38:4831886-4889417	38	4831886	4889417	numsnp=5	57532	state2,cn=1	BF.split9 s	BICF2S2293688	BICF2S23237658
chr38:23203335-23219235	38	23203335	23219235	numsnp=3	15901	state5,cn=3	BF.split21	BICF2G63066077	BICF2G63066072
chr38:23525635-23576338	38	23525635	23576338	numsnp=5	50704	state2,cn=1	BF.split23	BICF2P885495	BICF2G63065716
chr38:23537427-23576338	38	23537427	23576338	numsnp=4	38912	state2,cn=1	BF.split16	TIGRP2P424718_rs9249342	BICF2G63065716
chr38:23537427-23576338	38	23537427	23576338	numsnp=4	38912	state2,cn=1	BF.split17	TIGRP2P424718_rs9249342	BICF2G63065716
chr38:23537427-23576338	38	23537427	23576338	numsnp=4	38912	state2,cn=1	BF.split4 s	TIGRP2P424718_rs9249342	BICF2G63065716
chr38:23537427-23670217	38	23537427	23670217	numsnp=6	132791	state2,cn=1	BF.split15	TIGRP2P424718_rs9249342	BICF2G63065708
chr38:23537427-23670217	38	23537427	23670217	numsnp=6	132791	state2,cn=1	BF.split18	TIGRP2P424718_rs9249342	BICF2G63065708
chr38:23537427-23670217	38	23537427	23670217	numsnp=6	132791	state2,cn=1	BF.split21	TIGRP2P424718_rs9249342	BICF2G63065708
chr38:23537427-23670217	38	23537427	23670217	numsnp=6	132791	state2,cn=1	BF.split43	TIGRP2P424718_rs9249342	BICF2G63065708
chr38:23537427-23670217	38	23537427	23670217	numsnp=6	132791	state2,cn=1	BF.split6 s	TIGRP2P424718_rs9249342	BICF2G63065708
chr38:23537427-23670217	38	23537427	23670217	numsnp=6	132791	state2,cn=1	BF.split9 s	TIGRP2P424718_rs9249342	BICF2G63065708
chr38:23537427-23731071	38	23537427	23731071	numsnp=12	193645	state2,cn=1	BF.split2 s	TIGRP2P424718_rs9249342	BICF2G63065649
chr38:23555486-23576338	38	23555486	23576338	numsnp=3	20853	state2,cn=1	BF.split44	BICF2G63065730	BICF2G63065716

## Sheet: CNVRs_Penn
CNVR	Chr	Start Position	End Position	SNPs	Length	Start Marker	End Marker	Frequency
chr1:10163967-10198323	1	10163967	10198323	numsnp=3	34357	BICF2G630711520	BICF2P1458857	2
chr1:10444637-10604319	1	10444637	10604319	numsnp=11	159683	BICF2P1328116	TIGRP2P8195_rs9235469	2
chr1:11019380-11215077	1	11019380	11215077	numsnp=19	195698	TIGRP2P8261_rs8668370	BICF2P355794	2
chr1:11030313-11167874	1	11030313	11167874	numsnp=14	137562	TIGRP2P8264_rs8489051	BICF2P1082367	2
chr1:11040857-11074423	1	11040857	11074423	numsnp=4	33567	TIGRP2P8274_rs8903227	BICF2S23653590	2
chr1:11623152-11641176	1	11623152	11641176	numsnp=3	18025	BICF2P507250	BICF2P722535	3
chr1:11689281-11744340	1	11689281	11744340	numsnp=6	55060	TIGRP2P8484_rs9021101	BICF2P1135866	2
chr1:11759885-11799809	1	11759885	11799809	numsnp=6	39925	BICF2P576377	BICF2S2357622	2
chr1:11903839-11986934	1	11903839	11986934	numsnp=7	83096	BICF2S2312304	BICF2P1378726	4
chr1:12144103-12191961	1	12144103	12191961	numsnp=5	47859	BICF2P1162632	TIGRP2P15342_rs9127984	2
chr1:12395859-12452013	1	12395859	12452013	numsnp=6	56155	BICF2P682714	BICF2P527838	2
chr1:69133159-69177941	1	69133159	69177941	numsnp=5	44783	BICF2P551161	BICF2S2317062	2
chr1:111787188-111870787	1	111787188	111870787	numsnp=4	83600	BICF2P1185657	BICF2P1257349	10
chr1:121700084-121785177	1	121700084	121785177	numsnp=5	85094	BICF2P1272006	BICF2P15282	2
chr2:85014043-85062551	2	85014043	85062551	numsnp=5	48509	BICF2P619735	BICF2S23645363	16
chr3:3516768-3549040	3	3516768	3549040	numsnp=4	32273	BICF2P1182555	BICF2P158838	2
chr3:7445042-7474046	3	7445042	7474046	numsnp=4	29005	BICF2S231822	BICF2P395505	2
chr3:91351759-91530812	3	91351759	91530812	numsnp=17	179054	BICF2G630361819	BICF2S23326367	4
chr3:91380000-91439381	3	91380000	91439381	numsnp=7	59382	BICF2P1456918	BICF2G630361892	3
chr3:91380000-91530812	3	91380000	91530812	numsnp=14	150813	BICF2P1456918	BICF2S23326367	6
chr4:33991898-34067769	4	33991898	34067769	numsnp=9	75872	BICF2P1323528	BICF2P453069	4
chr4:34344727-34400207	4	34344727	34400207	numsnp=5	55481	BICF2P690253	BICF2P545755	5
chr4:34764154-34820893	4	34764154	34820893	numsnp=5	56740	BICF2P1062204	BICF2S23419768	11
chr4:34885914-35029820	4	34885914	35029820	numsnp=10	143907	BICF2P1445008	BICF2S23040085	2
chr4:78344039-78369603	4	78344039	78369603	numsnp=4	25565	BICF2G630172849	BICF2G630172911	5
chr5:630921-765207	5	630921	765207	numsnp=9	134287	BICF2S23630240	TIGRP2P69205_rs8688773	2
chr5:1243143-1290956	5	1243143	1290956	numsnp=4	47814	BICF2S23325646	BICF2S2397964	2
chr5:31095701-31171066	5	31095701	31171066	numsnp=6	75366	TIGRP2P70316_rs9232068	BICF2P328828	2
chr5:78388663-78474993	5	78388663	78474993	numsnp=7	86331	BICF2S23618907	BICF2P936230	4
chr6:38655424-38853551	6	38655424	38853551	numsnp=15	198128	BICF2P258497	BICF2S23138729	8
chr6:39106048-39155866	6	39106048	39155866	numsnp=6	49819	BICF2S2297073	BICF2P774856	2
chr6:39482383-39941098	6	39482383	39941098	numsnp=35	458716	TIGRP2P82574_rs8910870	BICF2S23232169	2
chr6:39505091-39701191	6	39505091	39701191	numsnp=17	196101	BICF2P108376	BICF2P734463	2
chr6:40137436-40261501	6	40137436	40261501	numsnp=10	124066	BICF2P475423	BICF2S2364709	5
chr6:40198138-40232810	6	40198138	40232810	numsnp=4	34673	BICF2P544640	TIGRP2P82676_rs8871439	3
chr6:40198138-40261501	6	40198138	40261501	numsnp=5	63364	BICF2P544640	BICF2S2364709	7
chr7:38374-158544	7	38374	158544	numsnp=9	120171	BICF2P357935	BICF2P1285992	2
chr7:55444-233188	7	55444	233188	numsnp=11	177745	BICF2G630465156	BICF2P474134	2
chr7:448697-499211	7	448697	499211	numsnp=5	50515	BICF2P1290428	BICF2P1288503	2
chr7:790325-836217	7	790325	836217	numsnp=5	45893	BICF2S23621822	BICF2P607865	6
chr7:810113-846445	7	810113	846445	numsnp=5	36333	BICF2P513937	BICF2P142496	4
chr7:846445-871741	7	846445	871741	numsnp=3	25297	BICF2P142496	BICF2P501390	6
chr7:893043-961257	7	893043	961257	numsnp=7	68215	BICF2P583714	BICF2P6113	3
chr7:1619223-1664084	7	1619223	1664084	numsnp=4	44862	BICF2P648367	BICF2G630465277	4
chr7:63442303-63479235	7	63442303	63479235	numsnp=4	36933	BICF2G630565389	BICF2P881101	3
chr7:76709392-76782725	7	76709392	76782725	numsnp=7	73334	TIGRP2P104835_rs8608374	TIGRP2P104850_rs8997684	2
chr8:39848047-39894805	8	39848047	39894805	numsnp=5	46759	TIGRP2P113591_rs9063248	BICF2P1144442	4
chr8:68452765-68470779	8	68452765	68470779	numsnp=4	18015	BICF2P1135323	BICF2P878905	2
chr8:71755643-71855000	8	71755643	71855000	numsnp=10	99358	BICF2P1295293	BICF2P5232	2
chr8:72377381-72485257	8	72377381	72485257	numsnp=7	107877	BICF2P153141	BICF2P952924	2
chr9:3493-351734	9	3493	351734	numsnp=25	348242	BICF2P309837	TIGRP2P244817_rs8572936	2
chr9:615993-795784	9	615993	795784	numsnp=14	179792	BICF2P1272565	BICF2P1188322	3
chr9:660066-997748	9	660066	997748	numsnp=28	337683	BICF2S23232063	TIGRP2P244718_rs8924886	2
chr9:884661-997748	9	884661	997748	numsnp=11	113088	BICF2P1206077	TIGRP2P244718_rs8924886	2
chr9:916372-997748	9	916372	997748	numsnp=8	81377	BICF2P801989	TIGRP2P244718_rs8924886	4
chr9:935245-997748	9	935245	997748	numsnp=6	62504	BICF2P1036569	TIGRP2P244718_rs8924886	5
chr9:1669133-1844385	9	1669133	1844385	numsnp=12	175253	BICF2P1179388	BICF2P223820	2
chr9:5190984-5240555	9	5190984	5240555	numsnp=5	49572	BICF2S23113017	BICF2P1183309	2
chr9:16904377-16972542	9	16904377	16972542	numsnp=4	68166	BICF2G630826984	TIGRP2P242412_rs8507839	11
chr9:36229022-36333983	9	36229022	36333983	numsnp=8	104962	BICF2G630836951	BICF2G630836989	5
chr9:36288858-36391953	9	36288858	36391953	numsnp=10	103096	BICF2P28144	BICF2G630837077	11
chr10:16036838-16120048	10	16036838	16120048	numsnp=3	83211	TIGRP2P137714_rs8655628	TIGRP2P138053_rs8699336	15
chr10:16943758-17055639	10	16943758	17055639	numsnp=10	111882	BICF2P1204119	BICF2P804757	9
chr10:17172641-17284700	10	17172641	17284700	numsnp=5	112060	BICF2P647101	BICF2P376281	10
chr10:17213229-17284700	10	17213229	17284700	numsnp=3	71472	BICF2G630476139	BICF2P376281	11
chr10:17744636-17796981	10	17744636	17796981	numsnp=6	52346	BICF2G630476696	BICF2G630476786	2
chr10:18100399-18220792	10	18100399	18220792	numsnp=11	120394	BICF2P212964	BICF2G630477032	7
chr11:9806092-9895000	11	9806092	9895000	numsnp=7	88909	TIGRP2P145068_rs9144596	BICF2P1363201	3
chr11:30232008-30344709	11	30232008	30344709	numsnp=4	112702	BICF2P1194082	BICF2P1426297	2
chr12:200611-237954	12	200611	237954	numsnp=3	37344	BICF2P949624	BICF2P1065219	2
chr12:72045149-72268125	12	72045149	72268125	numsnp=17	222977	TIGRP2P173862_rs8727941	BICF2P402255	8
chr12:72237583-72268125	12	72237583	72268125	numsnp=4	30543	BICF2P142225	BICF2P402255	11
chr12:72460835-72491619	12	72460835	72491619	numsnp=4	30785	BICF2S22924927	TIGRP2P174000_rs8757648	2
chr13:11172517-11374587	13	11172517	11374587	numsnp=20	202071	BICF2G630606982	BICF2G630607287	4
chr13:34485909-34531333	13	34485909	34531333	numsnp=4	45425	BICF2S23015593	BICF2G630660912	8
chr13:34547269-34600005	13	34547269	34600005	numsnp=6	52737	BICF2P165854	BICF2P280193	9
chr13:36078894-36115501	13	36078894	36115501	numsnp=4	36608	BICF2G630660023	BICF2P109838	11
chr13:36466625-36556191	13	36466625	36556191	numsnp=8	89567	BICF2P1214585	BICF2S23061158	5
chr13:36780469-36797785	13	36780469	36797785	numsnp=3	17317	TIGRP2P176253_rs8549359	BICF2P1388043	10
chr13:37003662-37107844	13	37003662	37107844	numsnp=10	104183	BICF2P1342321	BICF2P595459	2
chr13:37146265-37218075	13	37146265	37218075	numsnp=5	71811	TIGRP2P176445_rs8495575	BICF2P1221442	13
chr13:37408659-37462389	13	37408659	37462389	numsnp=6	53731	TIGRP2P176487_rs9233725	BICF2P1244912	4
chr13:37749630-37995197	13	37749630	37995197	numsnp=18	245568	TIGRP2P176541_rs9081625	BICF2P1345457	9
chr13:38311893-38390619	13	38311893	38390619	numsnp=9	78727	BICF2P166765	BICF2P777	2
chr13:38837733-38908921	13	38837733	38908921	numsnp=6	71189	BICF2P64599	TIGRP2P176902_rs8718686	4
chr13:38886582-38924425	13	38886582	38924425	numsnp=4	37844	BICF2P473216	TIGRP2P176915_rs8974490	3
chr14:645047-690052	14	645047	690052	numsnp=4	45006	BICF2P693197	BICF2S23661618	2
chr14:853721-1000647	14	853721	1000647	numsnp=12	146927	BICF2S2373579	BICF2P427413	8
chr14:884155-959840	14	884155	959840	numsnp=7	75686	BICF2P718943	BICF2P1171735	5
chr14:945637-980198	14	945637	980198	numsnp=4	34562	BICF2G630517202	BICF2P680493	6
chr14:2418990-2875196	14	2418990	2875196	numsnp=25	456207	BICF2G630517550	G813f42S171	6
chr14:57464864-57518154	14	57464864	57518154	numsnp=4	53291	G848f40S320	BICF2S23634171	2
chr14:60071291-60121432	14	60071291	60121432	numsnp=5	50142	BICF2S2361849	BICF2P463273	2
chr15:1367750-1424398	15	1367750	1424398	numsnp=5	56649	BICF2S23640369	BICF2P1031573	2
chr15:1702766-1745351	15	1702766	1745351	numsnp=3	42586	BICF2P670802	BICF2P917852	4
chr15:1800491-2088252	15	1800491	2088252	numsnp=14	287762	BICF2S23323874	TIGRP2P204051_rs8789952	3
chr15:2175727-2355639	15	2175727	2355639	numsnp=11	179913	BICF2P1386487	TIGRP2P204065_rs9170239	2
chr15:2259655-2511279	15	2259655	2511279	numsnp=11	251625	BICF2P170184	BICF2S23545443	2
chr15:2345493-2408558	15	2345493	2408558	numsnp=5	63066	TIGRP2P204063_rs8955770	G855f44S69	3
chr15:6033520-6100529	15	6033520	6100529	numsnp=5	67010	TIGRP2P204536_rs8691961	BICF2S23348405	3
chr15:7847615-7895743	15	7847615	7895743	numsnp=5	48129	BICF2P363342	BICF2P953500	2
chr15:8151549-8384052	15	8151549	8384052	numsnp=15	232504	TIGRP2P195277_rs8589772	BICF2G630444293	8
chr15:8242039-8394903	15	8242039	8394903	numsnp=12	152865	BICF2P781012	BICF2G630444284	2
chr15:8276202-8341839	15	8276202	8341839	numsnp=6	65638	BICF2S22939341	BICF2P1237493	3
chr15:8801056-8834322	15	8801056	8834322	numsnp=5	33267	BICF2P284408	BICF2G630444021	2
chr15:8804900-8822341	15	8804900	8822341	numsnp=3	17442	BICF2P1384998	BICF2S2306938	2
chr15:8994644-9017841	15	8994644	9017841	numsnp=3	23198	BICF2G630443965	BICF2P634569	2
chr15:9024348-9113704	15	9024348	9113704	numsnp=8	89357	BICF2G630443952	BICF2G630443895	2
chr15:9032702-9095002	15	9032702	9095002	numsnp=6	62301	BICF2G630443949	BICF2G630443908	2
chr15:9113704-9153890	15	9113704	9153890	numsnp=3	40187	BICF2G630443895	BICF2G630443876	4
chr15:9507855-9535581	15	9507855	9535581	numsnp=4	27727	BICF2G630443723	BICF2G630443693	4
chr15:9527368-9623638	15	9527368	9623638	numsnp=10	96271	BICF2P1127705	BICF2P477511	3
chr15:9546684-9605470	15	9546684	9605470	numsnp=6	58787			3
chr15:9615484-9802559	15	9615484	9802559	numsnp=15	187076	TIGRP2P195557_rs9047707	BICF2P522708	2
chr15:9647700-9730132	15	9647700	9730132	numsnp=9	82433	BICF2G630443632	BICF2P1270151	2
chr15:9683059-9730132	15	9683059	9730132	numsnp=6	47074	BICF2G630443583	BICF2P1270151	4
chr15:9702964-9780268	15	9702964	9780268	numsnp=7	77305	BICF2G630443572	BICF2P1044331	2
chr15:9887775-9968603	15	9887775	9968603	numsnp=7	80829	BICF2P959165	BICF2G630443531	2
chr15:29973349-30008279	15	29973349	30008279	numsnp=3	34931	TIGRP2P198593_rs8972241	TIGRP2P198686_rs8470730	3
chr16:383954-535352	16	383954	535352	numsnp=12	151399	BICF2S22915646	BICF2S23747408	5
chr16:975932-1074215	16	975932	1074215	numsnp=7	98284	BICF2S22911911	BICF2S23255367	2
chr17:749155-930518	17	749155	930518	numsnp=12	181364	BICF2S2362493	TIGRP2P227802_rs9048806	2
chr17:1528924-1566740	17	1528924	1566740	numsnp=5	37817	BICF2S23661069	BICF2P998863	11
chr17:1844703-1898225	17	1844703	1898225	numsnp=6	53523	BICF2P563598	BICF2S22926228	3
chr17:39871902-39905486	17	39871902	39905486	numsnp=4	33585	TIGRP2P231401_rs8544762	TIGRP2P231415_rs8979551	2
chr17:56701586-56761278	17	56701586	56761278	numsnp=5	59693	BICF2G630285265	BICF2G630285476	4
chr17:63200661-63243035	17	63200661	63243035	numsnp=5	42375	BICF2S2291499	BICF2P117656	3
chr18:92860-170509	18	92860	170509	numsnp=4	77650	BICF2P264063	BICF2P271099	2
chr18:25644344-25740090	18	25644344	25740090	numsnp=11	95747	BICF2P1358625	BICF2P14496	5
chr18:25703264-25740090	18	25703264	25740090	numsnp=5	36827	BICF2P1437597	BICF2P14496	2
chr18:41201448-41286087	18	41201448	41286087	numsnp=5	84640	TIGRP2P252941_rs8934066	TIGRP2P253035_rs8601902	2
chr18:42199134-42232638	18	42199134	42232638	numsnp=4	33505	BICF2P765522	BICF2P935846	8
chr18:46521374-46565444	18	46521374	46565444	numsnp=5	44071	BICF2P706211	BICF2P778313	5
chr19:20200223-20237246	19	20200223	20237246	numsnp=4	37024	BICF2G63042850	BICF2G63042872	4
chr20:53248043-53285579	20	53248043	53285579	numsnp=5	37537	BICF2P1229497	BICF2G630446823	2
chr20:56947851-56987434	20	56947851	56987434	numsnp=6	39584	BICF2P108587	BICF2P1189659	6
chr20:57179919-57236434	20	57179919	57236434	numsnp=6	56516	BICF2P808157	BICF2G630445226	8
chr20:57387702-57412903	20	57387702	57412903	numsnp=3	25202	BICF2G630445207	BICF2G630445205	8
chr20:57758412-57799619	20	57758412	57799619	numsnp=5	41208	BICF2G630444946	BICF2P1316344	2
chr21:30597639-30621562	21	30597639	30621562	numsnp=3	23924	BICF2P1217007	TIGRP2P283923_rs8529210	8
chr22:51294877-51312761	22	51294877	51312761	numsnp=3	17885	BICF2P1074098	BICF2S23511172	10
chr23:20529371-20657123	23	20529371	20657123	numsnp=8	127753	BICF2G630381500	BICF2G630381332	10
chr23:52156177-52159756	23	52156177	52159756	numsnp=3	3580	BICF2S23426173	BICF2S23425789	5
chr24:46547771-46580009	24	46547771	46580009	numsnp=6	32239	BICF2G630496037	BICF2G630495986	6
chr24:46606463-46672960	24	46606463	46672960	numsnp=6	66498	TIGRP2P322436_rs8701636	TIGRP2P322463_rs8687197	6
chr24:46974565-47128097	24	46974565	47128097	numsnp=15	153533	BICF2P940972	BICF2P1177117	5
chr24:47000283-47058943	24	47000283	47058943	numsnp=5	58661	BICF2G630495540	BICF2G630495500	10
chr24:47064507-47107013	24	47064507	47107013	numsnp=4	42507	BICF2S23654235	TIGRP2P322718_rs8542775	4
chr24:47484099-47561291	24	47484099	47561291	numsnp=7	77193	BICF2P317314	BICF2S23347652	4
chr25:25886759-25937919	25	25886759	25937919	numsnp=4	51161	G1290f21S220	BICF2P1001250	2
chr25:48611803-48662322	25	48611803	48662322	numsnp=6	50520	BICF2P792692	BICF2G630158483	2
chr25:50061338-50174384	25	50061338	50174384	numsnp=6	113047	BICF2P236596	BICF2P689448	3
chr25:50314369-50482865	25	50314369	50482865	numsnp=15	168497	TIGRP2P335336_rs9166663	BICF2G630156146	5
chr25:50345174-50482865	25	50345174	50482865	numsnp=13	137692	BICF2G630156379	BICF2G630156146	2
chr26:28202008-28215276	26	28202008	28215276	numsnp=3	13269	BICF2P520032	BICF2S2341340	2
chr27:2869179-2904028	27	2869179	2904028	numsnp=4	34850	BICF2G630138664	BICF2G630138694	2
chr27:25695551-25791536	27	25695551	25791536	numsnp=9	95986	TIGRP2P351680_rs8666747	BICF2G630150942	14
chr27:25751396-25810881	27	25751396	25810881	numsnp=10	59486	BICF2G630150819	BICF2G630150974	4
chr28:40299547-40325378	28	40299547	40325378	numsnp=3	25832	BICF2G630108823	BICF2P319846	5
chr28:40715077-40730141	28	40715077	40730141	numsnp=3	15065	BICF2P1025903	BICF2G63064629	6
chr28:40993026-41020381	28	40993026	41020381	numsnp=4	27356	BICF2P111596	BICF2P124519	13
chr30:39280736-39335352	30	39280736	39335352	numsnp=6	54617	BICF2S22960447	BICF2P1457950	7
chr31:37790558-37879054	31	37790558	37879054	numsnp=9	88497	BICF2P1229404	BICF2S23115109	2
chr31:38012346-38293227	31	38012346	38293227	numsnp=19	280882	BICF2P969976	BICF2P474081	6
chr31:38901096-38986689	31	38901096	38986689	numsnp=8	85594	BICF2G630199722	BICF2G630199814	6
chr31:38986689-39017391	31	38986689	39017391	numsnp=4	30703	BICF2G630199814	BICF2G630199890	2
chr31:39264290-39315810	31	39264290	39315810	numsnp=5	51521	BICF2P1275633	BICF2G630200283	5
chr31:39454796-39492996	31	39454796	39492996	numsnp=5	38201	BICF2P944797	BICF2P485223	4
chr36:13554759-13722385	36	13554759	13722385	numsnp=15	167627	BICF2S23525314	BICF2S23116783	2
chr36:13649606-13683959	36	13649606	13683959	numsnp=5	34354	BICF2P634930	BICF2S23637222	5
chr36:13649606-13965436	36	13649606	13965436	numsnp=29	315831	BICF2P634930	BICF2P386260	2
chr36:13662025-13674617	36	13662025	13674617	numsnp=3	12593	BICF2P1308360	BICF2P283050	4
chr36:13704544-13796426	36	13704544	13796426	numsnp=8	91883	BICF2S23515988	BICF2S23244383	2
chr36:13912578-13959147	36	13912578	13959147	numsnp=5	46570	BICF2S23736605	BICF2P1236668	5
chr36:14211947-14250584	36	14211947	14250584	numsnp=5	38638	BICF2P290941	BICF2P1387579	11
chr36:15666692-15706265	36	15666692	15706265	numsnp=4	39574	BICF2P992329	BICF2S23342386	2
chr36:16139977-16250967	36	16139977	16250967	numsnp=9	110991	TIGRP2P412392_rs8969957	TIGRP2P412407_rs8675412	2
chr36:16226274-16250967	36	16226274	16250967	numsnp=3	24694	BICF2P1166863	TIGRP2P412407_rs8675412	4
chr37:30058014-30112232	37	30058014	30112232	numsnp=6	54219	BICF2G630135358	BICF2P640682	2
chr38:4831886-4889417	38	4831886	4889417	numsnp=5	57532	BICF2S2293688	BICF2S23237658	2
chr38:23537427-23576338	38	23537427	23576338	numsnp=4	38912	TIGRP2P424718_rs9249342	BICF2G63065716	11

## Sheet: CNVs_SVS
SampleID	Chromosome Name	Start Position	End Position	Segment Mean	Length (bp)	Start Index	End Index	Start Marker	End Marker	# Markers	Discrete Seg
V3254	1	10038976	10077081	-3.3714	38106	739	742	BICF2G630711468	BICF2S23738534	4	-1
V3268	1	10138348	10177435	-3.98514	39088	746	748	BICF2G630711516	BICF2P405380	3	-1
V3295	1	10653510	10683500	-4.54162	29991	779	781	BICF2P1138627	BICF2P1171726	3	-1
V3287	1	10744350	11040857	-1.38039	296508	784	806	BICF2P463824	TIGRP2P8274_rs8903227	23	-1
V3271	1	10898701	10949569	-3.14589	50869	794	798	BICF2S23155214	BICF2P461234	5	-1
V3267	1	10949569	10976955	-3.98166	27387	798	800	BICF2P461234	BICF2S22926875	3	-1
V3270	1	11155024	11167874	-3.5928	12851	816	818	BICF2S23322680	BICF2P1082367	3	-1
V3252	1	11200412	11230533	-4.51468	30122	821	823	BICF2P1120090	BICF2P836101	3	-1
V3297	1	11200412	11230533	-5.47749	30122	821	823	BICF2P1120090	BICF2P836101	3	-1
V3256	1	11238658	11262018	-6.80125	23361	824	826	BICF2P598528	BICF2P804546	3	-1
V3256	1	11286624	11884008	-0.354816	597385	827	879	BICF2P304894	TIGRP2P8538_rs8853941	53	-1
V3278	1	11379803	11417719	-3.42257	37917	834	837	BICF2S2448843	TIGRP2P8368_rs8521221	4	-1
V3280	1	11484777	11515783	-4.01875	31007	843	846	BICF2P238243	BICF2S2369926	4	-1
V3298	1	11515783	11551176	-3.84604	35394	846	849	BICF2S2369926	BICF2S22933891	4	-1
V3276	1	11608580	11629081	-3.90996	20502	855	857	BICF2P813078	BICF2S2369046	3	-1
V3256	1	11891267	11928596	-4.65567	37330	880	883	BICF2P653565	BICF2P734269	4	-1
V3269	1	12055950	12089620	-4.28235	33671	892	895	TIGRP2P8605_rs8516721	BICF2P303826	4	-1
V3279	1	12089620	12118943	-2.30929	29324	895	897	BICF2P303826	BICF2S23331108	3	-1
V3273	1	12395859	12418403	-6.79101	22545	918	920	BICF2P682714	TIGRP2P15489_rs9216368	3	-1
V3268	1	63747778	63795450	-3.62902	47673	4943	4945	BICF2S23618673	BICF2P670887	3	-1
V3267	1	95123524	95137973	-2.14749	14450	7233	7235	BICF2G630789073	BICF2G630789049	3	-1
V3289	1	104812662	104843898	-2.80929	31237	7823	7825	G74f27S167	BICF2P1371208	3	-1
V3293	2	30680895	30725471	-1.95543	44577	11018	11020	BICF2P130962	BICF2P1260917	3	-1
V3269	2	32626622	32655047	-2.92374	28426	11167	11169	BICF2P783253	BICF2P57582	3	-1
V3261	2	33478919	34405461	-0.271617	926543	11227	11292	BICF2P1211790	BICF2P502587	66	-1
V3256	2	45707330	45724776	-2.20398	17447	12071	12073	BICF2P625734	BICF2P366680	3	-1
V3287	2	45707330	45724776	-1.75098	17447	12071	12073	BICF2P625734	BICF2P366680	3	-1
V3289	2	45724776	45817582	-1.5111	92807	12073	12079	BICF2P366680	BICF2P262642	7	-1
V3292	2	49876847	49898098	-1.71981	21252	12362	12364	BICF2S23653782	TIGRP2P22790_rs9003780	3	-1
V3287	2	54409466	54442968	-0.894964	33503	12693	12695	BICF2S2451900	TIGRP2P25086_rs8894000	3	-1
V3287	2	62806184	62819748	-1.78396	13565	13301	13303	BICF2P387789	TIGRP2P27632_rs9204283	3	-1
V3261	2	63082751	63109330	-1.49117	26580	13324	13326	BICF2G630494390	BICF2G630494417	3	-1
V3279	2	63082751	63109330	-1.41025	26580	13324	13326	BICF2G630494390	BICF2G630494417	3	-1
V3286	2	63082751	63109330	-1.30419	26580	13324	13326	BICF2G630494390	BICF2G630494417	3	-1
V3293	2	63082751	63109330	-1.34564	26580	13324	13326	BICF2G630494390	BICF2G630494417	3	-1
V3271	2	63098773	63124146	-1.28208	25374	13325	13327	BICF2G630494402	BICF2P267812	3	-1
V3273	2	63098773	63124146	-1.31852	25374	13325	13327	BICF2G630494402	BICF2P267812	3	-1
V3267	2	63109330	63129714	-1.4256	20385	13326	13328	BICF2G630494417	BICF2P868484	3	-1
V3268	2	63109330	63129714	-1.31215	20385	13326	13328	BICF2G630494417	BICF2P868484	3	-1
V3276	2	63109330	63129714	-1.47805	20385	13326	13328	BICF2G630494417	BICF2P868484	3	-1
V3285	2	63109330	63129714	-1.26636	20385	13326	13328	BICF2G630494417	BICF2P868484	3	-1
V3297	2	63109330	63129714	-1.31864	20385	13326	13328	BICF2G630494417	BICF2P868484	3	-1
V3298	2	63109330	63129714	-1.26518	20385	13326	13328	BICF2G630494417	BICF2P868484	3	-1
V3261	2	81497590	81516611	-1.2829	19022	14776	14778	BICF2P230021	BICF2P195256	3	-1
V3270	2	84380955	85373067	-0.261888	992113	15001	15070	BICF2S23135643	BICF2P155872	70	-1
V3292	2	84380955	85373067	-0.291297	992113	15001	15070	BICF2S23135643	BICF2P155872	70	-1
V3252	2	84457908	85373067	-0.206227	915160	15007	15070	BICF2S2373519	BICF2P155872	64	-1
V3254	2	84457908	85373067	-0.211698	915160	15007	15070	BICF2S2373519	BICF2P155872	64	-1
V3261	2	84457908	85373067	-0.297049	915160	15007	15070	BICF2S2373519	BICF2P155872	64	-1
V3267	2	84457908	85373067	-0.231343	915160	15007	15070	BICF2S2373519	BICF2P155872	64	-1
V3268	2	84457908	85373067	-0.260392	915160	15007	15070	BICF2S2373519	BICF2P155872	64	-1
V3271	2	84457908	85373067	-0.253434	915160	15007	15070	BICF2S2373519	BICF2P155872	64	-1
V3273	2	84457908	85373067	-0.257819	915160	15007	15070	BICF2S2373519	BICF2P155872	64	-1
V3275	2	84457908	85373067	-0.266704	915160	15007	15070	BICF2S2373519	BICF2P155872	64	-1
V3279	2	84457908	85373067	-0.24946	915160	15007	15070	BICF2S2373519	BICF2P155872	64	-1
V3295	2	84457908	85373067	-0.235953	915160	15007	15070	BICF2S2373519	BICF2P155872	64	-1
V3298	2	84457908	85373067	-0.201619	915160	15007	15070	BICF2S2373519	BICF2P155872	64	-1
V3269	2	84953251	85373067	-0.545514	419817	15044	15070	TIGRP2P36259_rs8655107	BICF2P155872	27	-1
V3291	2	84966832	85373067	-0.24331	406236	15046	15070	BICF2G630464859	BICF2P155872	25	-1
V3276	3	4835913	4868331	-3.84912	32419	15398	15400	BICF2P113222	BICF2P1230901	3	-1
V3279	3	21845306	21879130	-2.5283	33825	16687	16689	BICF2S2318793	BICF2P371492	3	-1
V3298	3	21864806	21898486	-1.62078	33681	16688	16690	BICF2S23132141	BICF2P50041	3	-1
V3261	3	21879130	21932867	-2.62188	53738	16689	16691	BICF2P371492	BICF2P655153	3	-1
V3267	3	21879130	21932867	-2.43831	53738	16689	16691	BICF2P371492	BICF2P655153	3	-1
V3273	3	21879130	21932867	-2.06774	53738	16689	16691	BICF2P371492	BICF2P655153	3	-1
V3276	3	21879130	21932867	-2.42343	53738	16689	16691	BICF2P371492	BICF2P655153	3	-1
V3280	3	21879130	21932867	-1.99383	53738	16689	16691	BICF2P371492	BICF2P655153	3	-1
V3285	3	21879130	21932867	-2.69373	53738	16689	16691	BICF2P371492	BICF2P655153	3	-1
V3286	3	21879130	21932867	-2.23766	53738	16689	16691	BICF2P371492	BICF2P655153	3	-1
V3289	3	21879130	21932867	-2.47941	53738	16689	16691	BICF2P371492	BICF2P655153	3	-1
V3291	3	21879130	21932867	-2.5596	53738	16689	16691	BICF2P371492	BICF2P655153	3	-1
V3293	3	21879130	21932867	-1.96474	53738	16689	16691	BICF2P371492	BICF2P655153	3	-1
V3295	3	21879130	21932867	-1.88533	53738	16689	16691	BICF2P371492	BICF2P655153	3	-1
V3297	3	21879130	21932867	-2.44443	53738	16689	16691	BICF2P371492	BICF2P655153	3	-1
V3267	3	28427635	28454291	-1.54046	26657	17137	17139	BICF2G630704922	BICF2G630704954	3	-1
V3293	3	28427635	28454291	-1.54199	26657	17137	17139	BICF2G630704922	BICF2G630704954	3	-1
V3267	3	31290537	31338689	-1.52189	48153	17344	17346	BICF2G630706786	BICF2G630706900	3	-1
V3273	3	31290537	31338689	-1.59507	48153	17344	17346	BICF2G630706786	BICF2G630706900	3	-1
V3289	3	31290537	31338689	-1.69735	48153	17344	17346	BICF2G630706786	BICF2G630706900	3	-1
V3291	3	31290537	31338689	-1.56899	48153	17344	17346	BICF2G630706786	BICF2G630706900	3	-1
V3293	3	31290537	31338689	-1.48082	48153	17344	17346	BICF2G630706786	BICF2G630706900	3	-1
V3295	3	31290537	31338689	-1.49643	48153	17344	17346	BICF2G630706786	BICF2G630706900	3	-1
V3297	3	31290537	31338689	-1.57189	48153	17344	17346	BICF2G630706786	BICF2G630706900	3	-1
V3252	3	49308429	49334630	-0.966281	26202	18616	18618	TIGRP2P44301_rs8895405	BICF2P528674	3	-1
V3256	3	49308429	49334630	-0.931086	26202	18616	18618	TIGRP2P44301_rs8895405	BICF2P528674	3	-1
V3268	3	49308429	49334630	-1.23026	26202	18616	18618	TIGRP2P44301_rs8895405	BICF2P528674	3	-1
V3270	3	49308429	49334630	-1.18405	26202	18616	18618	TIGRP2P44301_rs8895405	BICF2P528674	3	-1
V3275	3	49308429	49334630	-1.18992	26202	18616	18618	TIGRP2P44301_rs8895405	BICF2P528674	3	-1
V3285	3	49308429	49334630	-1.0931	26202	18616	18618	TIGRP2P44301_rs8895405	BICF2P528674	3	-1
V3254	3	49323200	49339420	-0.831388	16221	18617	18619	BICF2P687613	BICF2P46818	3	-1
V3261	3	49323200	49339420	-1.18445	16221	18617	18619	BICF2P687613	BICF2P46818	3	-1
V3267	3	49323200	49339420	-1.14928	16221	18617	18619	BICF2P687613	BICF2P46818	3	-1
V3271	3	49323200	49339420	-1.24225	16221	18617	18619	BICF2P687613	BICF2P46818	3	-1
V3273	3	49323200	49339420	-0.96929	16221	18617	18619	BICF2P687613	BICF2P46818	3	-1
V3279	3	49323200	49339420	-1.12744	16221	18617	18619	BICF2P687613	BICF2P46818	3	-1
V3280	3	49323200	49339420	-1.14123	16221	18617	18619	BICF2P687613	BICF2P46818	3	-1
V3278	3	49323200	49407575	-0.644789	84376	18617	18625	BICF2P687613	BICF2S23442987	9	-1
V3296	3	49323200	49407575	-0.633064	84376	18617	18625	BICF2P687613	BICF2S23442987	9	-1
V3293	3	49402651	49432801	-1.54427	30151	18624	18626	BICF2P244978	BICF2S23430879	3	-1
V3295	3	49402651	49432801	-1.39545	30151	18624	18626	BICF2P244978	BICF2S23430879	3	-1
V3261	3	60133304	60160899	-1.05258	27596	19495	19497	BICF2G630344343	BICF2G630344389	3	-1
V3269	3	60133304	60160899	-1.03778	27596	19495	19497	BICF2G630344343	BICF2G630344389	3	-1
V3270	3	60133304	60160899	-1.01812	27596	19495	19497	BICF2G630344343	BICF2G630344389	3	-1
V3273	3	60133304	60160899	-1.0482	27596	19495	19497	BICF2G630344343	BICF2G630344389	3	-1
V3278	3	60133304	60160899	-0.893278	27596	19495	19497	BICF2G630344343	BICF2G630344389	3	-1
V3296	3	65441285	65462673	-1.41412	21389	19936	19938	BICF2S23345176	BICF2P846585	3	-1
V3271	3	65462673	65484332	-1.48511	21660	19938	19940	BICF2P846585	TIGRP2P49942_rs8703629	3	-1
V3297	3	65462673	65484332	-1.42132	21660	19938	19940	BICF2P846585	TIGRP2P49942_rs8703629	3	-1
V3286	3	65575523	65600420	-1.79411	24898	19949	19951	BICF2P1372577	BICF2P654341	3	-1
V3256	3	68036328	68060655	-1.26248	24328	20163	20165	BICF2G630346944	BICF2G630346971	3	-1
V3267	3	68036328	68060655	-1.24834	24328	20163	20165	BICF2G630346944	BICF2G630346971	3	-1
V3268	3	68036328	68060655	-1.25673	24328	20163	20165	BICF2G630346944	BICF2G630346971	3	-1
V3270	3	68036328	68060655	-1.25331	24328	20163	20165	BICF2G630346944	BICF2G630346971	3	-1
V3279	3	68036328	68060655	-1.30533	24328	20163	20165	BICF2G630346944	BICF2G630346971	3	-1
V3287	3	68036328	68060655	-1.15382	24328	20163	20165	BICF2G630346944	BICF2G630346971	3	-1
V3289	3	68036328	68060655	-1.28029	24328	20163	20165	BICF2G630346944	BICF2G630346971	3	-1
V3291	3	68036328	68060655	-1.23114	24328	20163	20165	BICF2G630346944	BICF2G630346971	3	-1
V3292	3	68036328	68060655	-1.32761	24328	20163	20165	BICF2G630346944	BICF2G630346971	3	-1
V3295	3	68036328	68060655	-1.28212	24328	20163	20165	BICF2G630346944	BICF2G630346971	3	-1
V3298	3	68036328	68060655	-1.27711	24328	20163	20165	BICF2G630346944	BICF2G630346971	3	-1
V3261	3	68060655	68086466	-1.30482	25812	20165	20167	BICF2G630346971	TIGRP2P50581_rs9033606	3	-1
V3254	3	74624696	74659295	-0.694619	34600	20708	20711	BICF2G630349611	BICF2G630349656	4	-1
V3267	3	82818907	82834459	-1.21647	15553	21379	21381	TIGRP2P54395_rs8895672	BICF2S23541439	3	-1
V3261	3	82983477	83003362	-0.993641	19886	21396	21398	BICF2P357365	BICF2P445309	3	-1
V3291	3	91125824	91331529	0.287895	205706	22132	22148	TIGRP2P56825_rs9063147	BICF2G630361800	17	1
V3252	3	91351759	91858198	-0.392819	506440	22149	22189	BICF2G630361819	BICF2S22917226	41	-1
V3254	3	91351759	91858198	-0.362538	506440	22149	22189	BICF2G630361819	BICF2S22917226	41	-1
V3256	3	91351759	91858198	-0.321665	506440	22149	22189	BICF2G630361819	BICF2S22917226	41	-1
V3261	3	91351759	91858198	-0.423754	506440	22149	22189	BICF2G630361819	BICF2S22917226	41	-1
V3269	3	91351759	91858198	-0.385262	506440	22149	22189	BICF2G630361819	BICF2S22917226	41	-1
V3275	3	91351759	91858198	-0.426783	506440	22149	22189	BICF2G630361819	BICF2S22917226	41	-1
V3278	3	91351759	91858198	-0.442535	506440	22149	22189	BICF2G630361819	BICF2S22917226	41	-1
V3280	3	91351759	91858198	-0.369556	506440	22149	22189	BICF2G630361819	BICF2S22917226	41	-1
V3289	3	91351759	91858198	-0.307411	506440	22149	22189	BICF2G630361819	BICF2S22917226	41	-1
V3291	3	91351759	91858198	-0.335248	506440	22149	22189	BICF2G630361819	BICF2S22917226	41	-1
V3293	3	91351759	91858198	-0.400903	506440	22149	22189	BICF2G630361819	BICF2S22917226	41	-1
V3295	3	91351759	91858198	-0.364499	506440	22149	22189	BICF2G630361819	BICF2S22917226	41	-1
V3296	3	91351759	91858198	-0.388073	506440	22149	22189	BICF2G630361819	BICF2S22917226	41	-1
V3298	3	91351759	91858198	-0.290543	506440	22149	22189	BICF2G630361819	BICF2S22917226	41	-1
V3267	3	91380000	91858198	-0.43697	478199	22152	22189	BICF2P1456918	BICF2S22917226	38	-1
V3268	3	91380000	91858198	-0.395559	478199	22152	22189	BICF2P1456918	BICF2S22917226	38	-1
V3270	3	91380000	91858198	-0.409043	478199	22152	22189	BICF2P1456918	BICF2S22917226	38	-1
V3271	3	91380000	91858198	-0.475543	478199	22152	22189	BICF2P1456918	BICF2S22917226	38	-1
V3273	3	91380000	91858198	-0.432909	478199	22152	22189	BICF2P1456918	BICF2S22917226	38	-1
V3279	3	91380000	91858198	-0.404143	478199	22152	22189	BICF2P1456918	BICF2S22917226	38	-1
V3285	3	91380000	91858198	-0.240119	478199	22152	22189	BICF2P1456918	BICF2S22917226	38	-1
V3292	3	91380000	91858198	-0.428947	478199	22152	22189	BICF2P1456918	BICF2S22917226	38	-1
V3273	4	8945756	8970080	-1.32875	24325	22895	22897	BICF2P1178269	BICF2P702720	3	-1
V3256	4	9233605	9259808	-1.21862	26204	22919	22921	BICF2P267164	TIGRP2P58028_rs9197093	3	-1
V3261	4	9233605	9259808	-1.18678	26204	22919	22921	BICF2P267164	TIGRP2P58028_rs9197093	3	-1
V3269	4	9233605	9259808	-1.18693	26204	22919	22921	BICF2P267164	TIGRP2P58028_rs9197093	3	-1
V3275	4	9233605	9259808	-1.15726	26204	22919	22921	BICF2P267164	TIGRP2P58028_rs9197093	3	-1
V3287	4	9233605	9259808	-0.988991	26204	22919	22921	BICF2P267164	TIGRP2P58028_rs9197093	3	-1
V3256	4	19215607	19271931	-1.6392	56325	23650	23652	BICF2P751234	BICF2P362755	3	-1
V3261	4	19215607	19271931	-2.19466	56325	23650	23652	BICF2P751234	BICF2P362755	3	-1
V3267	4	19215607	19271931	-2.0463	56325	23650	23652	BICF2P751234	BICF2P362755	3	-1
V3269	4	19215607	19271931	-2.01717	56325	23650	23652	BICF2P751234	BICF2P362755	3	-1
V3271	4	19215607	19271931	-2.05019	56325	23650	23652	BICF2P751234	BICF2P362755	3	-1
V3275	4	19215607	19271931	-2.07607	56325	23650	23652	BICF2P751234	BICF2P362755	3	-1
V3279	4	19215607	19271931	-1.9934	56325	23650	23652	BICF2P751234	BICF2P362755	3	-1
V3280	4	19215607	19271931	-1.74717	56325	23650	23652	BICF2P751234	BICF2P362755	3	-1
V3289	4	19215607	19271931	-1.84616	56325	23650	23652	BICF2P751234	BICF2P362755	3	-1
V3291	4	19215607	19271931	-1.74959	56325	23650	23652	BICF2P751234	BICF2P362755	3	-1
V3292	4	19215607	19271931	-1.96417	56325	23650	23652	BICF2P751234	BICF2P362755	3	-1
V3293	4	19215607	19271931	-1.93665	56325	23650	23652	BICF2P751234	BICF2P362755	3	-1
V3296	4	19215607	19271931	-1.5938	56325	23650	23652	BICF2P751234	BICF2P362755	3	-1
V3297	4	19215607	19271931	-1.82229	56325	23650	23652	BICF2P751234	BICF2P362755	3	-1
V3286	4	20533539	20554700	-3.23335	21162	23720	23722	BICF2P1386178	BICF2P1356480	3	-1
V3289	4	20533539	20554700	-3.77386	21162	23720	23722	BICF2P1386178	BICF2P1356480	3	-1
V3295	4	20533539	20554700	-3.01438	21162	23720	23722	BICF2P1386178	BICF2P1356480	3	-1
V3278	4	20546501	20566485	-2.51611	19985	23721	23723	BICF2P26423	BICF2P672920	3	-1
V3261	4	33916140	34067769	-0.741252	151630	24777	24787	BICF2P872156	BICF2P453069	11	-1
V3285	4	33937158	34067769	-0.403102	130612	24778	24787	BICF2P199834	BICF2P453069	10	-1
V3297	4	33937158	34067769	-0.508264	130612	24778	24787	BICF2P199834	BICF2P453069	10	-1
V3271	4	33991898	34014334	-1.09448	22437	24779	24783	BICF2P1323528	BICF2P606687	5	-1
V3268	4	34013371	34014334	-1.14197	964	24781	24783	BICF2P606679	BICF2P606687	3	-1
V3269	4	34013371	34014334	-1.12913	964	24781	24783	BICF2P606679	BICF2P606687	3	-1
V3270	4	34013371	34014334	-1.12897	964	24781	24783	BICF2P606679	BICF2P606687	3	-1
V3261	4	34764154	35029820	-0.565205	265667	24832	24849	BICF2P1062204	BICF2S23040085	18	-1
V3267	4	36087780	36109111	-3.34541	21332	24937	24939	BICF2G630167468	TIGRP2P60279_rs9225167	3	-1
V3287	4	36087780	36109111	-2.47669	21332	24937	24939	BICF2G630167468	TIGRP2P60279_rs9225167	3	-1
V3256	4	55653099	55683468	-1.82798	30370	26417	26419	BICF2P18092	BICF2P1031315	3	-1
V3280	4	55653099	55683468	-1.87078	30370	26417	26419	BICF2P18092	BICF2P1031315	3	-1
V3289	4	55653099	55683468	-1.82602	30370	26417	26419	BICF2P18092	BICF2P1031315	3	-1
V3261	4	58838608	58857422	-1.26883	18815	26678	26680	BICF2P649117	BICF2P497342	3	-1
V3268	4	58838608	58857422	-1.0749	18815	26678	26680	BICF2P649117	BICF2P497342	3	-1
V3269	4	58838608	58857422	-0.925326	18815	26678	26680	BICF2P649117	BICF2P497342	3	-1
V3270	4	58838608	58857422	-0.954562	18815	26678	26680	BICF2P649117	BICF2P497342	3	-1
V3271	4	58838608	58857422	-1.17432	18815	26678	26680	BICF2P649117	BICF2P497342	3	-1
V3275	4	58838608	58857422	-1.13621	18815	26678	26680	BICF2P649117	BICF2P497342	3	-1
V3293	4	58838608	58857422	-1.00969	18815	26678	26680	BICF2P649117	BICF2P497342	3	-1
V3295	4	58838608	58857422	-1.02541	18815	26678	26680	BICF2P649117	BICF2P497342	3	-1
V3285	4	63881040	63922201	-1.122	41162	27047	27049	BICF2S2308813	BICF2P360740	3	-1
V3286	4	63898127	63929017	-1.16239	30891	27048	27050	BICF2S24113672	BICF2P230234	3	-1
V3256	4	78775037	78793816	-2.33206	18780	28231	28233	BICF2G630173369	BICF2G630173408	3	-1
V3261	4	78775037	78793816	-2.5454	18780	28231	28233	BICF2G630173369	BICF2G630173408	3	-1
V3268	4	78775037	78793816	-2.34284	18780	28231	28233	BICF2G630173369	BICF2G630173408	3	-1
V3270	4	78775037	78793816	-2.52085	18780	28231	28233	BICF2G630173369	BICF2G630173408	3	-1
V3275	4	78775037	78793816	-2.2505	18780	28231	28233	BICF2G630173369	BICF2G630173408	3	-1
V3276	4	78775037	78793816	-2.30352	18780	28231	28233	BICF2G630173369	BICF2G630173408	3	-1
V3278	4	78775037	78793816	-2.20698	18780	28231	28233	BICF2G630173369	BICF2G630173408	3	-1
V3279	4	78775037	78793816	-2.40093	18780	28231	28233	BICF2G630173369	BICF2G630173408	3	-1
V3280	4	78775037	78793816	-2.37248	18780	28231	28233	BICF2G630173369	BICF2G630173408	3	-1
V3286	4	78775037	78793816	-2.20048	18780	28231	28233	BICF2G630173369	BICF2G630173408	3	-1
V3289	4	78775037	78793816	-2.25855	18780	28231	28233	BICF2G630173369	BICF2G630173408	3	-1
V3291	4	78775037	78793816	-2.34932	18780	28231	28233	BICF2G630173369	BICF2G630173408	3	-1
V3292	4	78775037	78793816	-2.22722	18780	28231	28233	BICF2G630173369	BICF2G630173408	3	-1
V3293	4	78775037	78793816	-2.35125	18780	28231	28233	BICF2G630173369	BICF2G630173408	3	-1
V3298	4	78775037	78793816	-2.1673	18780	28231	28233	BICF2G630173369	BICF2G630173408	3	-1
V3287	4	78782378	78808000	-2.13138	25623	28232	28234	BICF2S23032463	BICF2G630173432	3	-1
V3271	4	78793816	78837679	-0.748318	43864	28233	28237	BICF2G630173408	BICF2G630173462	5	-1
V3295	4	78793816	78837679	-0.772011	43864	28233	28237	BICF2G630173408	BICF2G630173462	5	-1
V3297	4	78793816	78837679	-0.664886	43864	28233	28237	BICF2G630173408	BICF2G630173462	5	-1
V3296	4	79321033	79345122	-1.25232	24090	28276	28278	BICF2G630174012	BICF2G630174064	3	-1
V3252	4	79334914	79354704	-0.981685	19791	28277	28279	BICF2G630174056	BICF2G630174072	3	-1
V3267	4	79334914	79354704	-1.66506	19791	28277	28279	BICF2G630174056	BICF2G630174072	3	-1
V3269	4	79334914	79354704	-1.02278	19791	28277	28279	BICF2G630174056	BICF2G630174072	3	-1
V3285	4	79334914	79354704	-1.59938	19791	28277	28279	BICF2G630174056	BICF2G630174072	3	-1
V3273	4	84464385	84480387	-1.41503	16003	28708	28710	BICF2P950698	BICF2G630178866	3	-1
V3280	4	84464385	84480387	-1.81415	16003	28708	28710	BICF2P950698	BICF2G630178866	3	-1
V3285	4	84464385	84480387	-1.62533	16003	28708	28710	BICF2P950698	BICF2G630178866	3	-1
V3291	4	84464385	84480387	-1.60281	16003	28708	28710	BICF2P950698	BICF2G630178866	3	-1
V3296	4	84464385	84480387	-1.50484	16003	28708	28710	BICF2P950698	BICF2G630178866	3	-1
V3261	5	111100	310184	-0.656182	199085	29039	29054	BICF2P1500181	BICF2S23656250	16	-1
V3256	5	289682	310184	-2.65035	20503	29052	29054	BICF2S23145124	BICF2S23656250	3	-1
V3268	5	289682	310184	-2.44386	20503	29052	29054	BICF2S23145124	BICF2S23656250	3	-1
V3270	5	289682	310184	-2.45688	20503	29052	29054	BICF2S23145124	BICF2S23656250	3	-1
V3275	5	289682	310184	-2.49207	20503	29052	29054	BICF2S23145124	BICF2S23656250	3	-1
V3276	5	289682	310184	-2.42827	20503	29052	29054	BICF2S23145124	BICF2S23656250	3	-1
V3278	5	289682	310184	-1.33661	20503	29052	29054	BICF2S23145124	BICF2S23656250	3	-1
V3279	5	289682	310184	-1.27293	20503	29052	29054	BICF2S23145124	BICF2S23656250	3	-1
V3286	5	289682	310184	-2.70346	20503	29052	29054	BICF2S23145124	BICF2S23656250	3	-1
V3287	5	289682	310184	-1.98349	20503	29052	29054	BICF2S23145124	BICF2S23656250	3	-1
V3289	5	289682	310184	-2.69367	20503	29052	29054	BICF2S23145124	BICF2S23656250	3	-1
V3296	5	289682	310184	-2.26021	20503	29052	29054	BICF2S23145124	BICF2S23656250	3	-1
V3298	5	289682	310184	-2.03238	20503	29052	29054	BICF2S23145124	BICF2S23656250	3	-1
V3270	5	8489727	8515268	-2.54198	25542	29694	29696	BICF2P710978	BICF2S23351851	3	-1
V3271	5	8489727	8515268	-2.05404	25542	29694	29696	BICF2P710978	BICF2S23351851	3	-1
V3276	5	8489727	8515268	-1.96446	25542	29694	29696	BICF2P710978	BICF2S23351851	3	-1
V3278	5	8489727	8515268	-2.10703	25542	29694	29696	BICF2P710978	BICF2S23351851	3	-1
V3279	5	8489727	8515268	-2.42335	25542	29694	29696	BICF2P710978	BICF2S23351851	3	-1
V3287	5	8489727	8515268	-2.04052	25542	29694	29696	BICF2P710978	BICF2S23351851	3	-1
V3289	5	8489727	8515268	-2.30853	25542	29694	29696	BICF2P710978	BICF2S23351851	3	-1
V3293	5	8489727	8515268	-2.24077	25542	29694	29696	BICF2P710978	BICF2S23351851	3	-1
V3295	5	8489727	8515268	-2.70324	25542	29694	29696	BICF2P710978	BICF2S23351851	3	-1
V3298	5	8489727	8515268	-1.93405	25542	29694	29696	BICF2P710978	BICF2S23351851	3	-1
V3298	5	19602141	19633912	-1.01269	31772	30531	30533	BICF2P1494851	TIGRP2P69653_rs9157692	3	-1
V3276	5	22315998	22355239	-1.51772	39242	30723	30725	BICF2P1361834	BICF2P64139	3	-1
V3293	5	22315998	22355239	-1.59906	39242	30723	30725	BICF2P1361834	BICF2P64139	3	-1
V3271	5	23237329	23273781	-0.964486	36453	30789	30792	BICF2P1070834	BICF2P1415849	4	-1
V3298	5	30417906	30496048	-0.910314	78143	31366	31369	BICF2P1339473	BICF2G630182217	4	-1
V3270	5	30417906	30828965	-0.349206	411060	31366	31397	BICF2P1339473	BICF2P387265	32	-1
V3279	5	30417906	30861988	-0.295085	444083	31366	31399	BICF2P1339473	BICF2G630182377	34	-1
V3278	5	56224866	56660509	-0.380734	435644	33302	33324	BICF2P528235	BICF2S2413175	23	-1
V3298	5	56224866	56660509	-0.304355	435644	33302	33324	BICF2P528235	BICF2S2413175	23	-1
V3279	5	56363956	56581718	-0.568848	217763	33313	33322	BICF2P1108442	BICF2P1041396	10	-1
V3270	5	56571240	56592784	-1.0123	21545	33321	33323	BICF2S23554129	BICF2S23438281	3	-1
V3270	5	68439373	68468279	-1.0328	28907	34238	34240	BICF2G630240845	BICF2G630240820	3	-1
V3298	5	74254427	74275069	-0.982536	20643	34719	34721	BICF2P471058	BICF2P553400	3	-1
V3279	5	84302531	84334311	-4.14943	31781	35416	35418	BICF2P68576	BICF2S23261228	3	-1
V3293	5	84324261	84337534	-2.37866	13274	35417	35419	BICF2P789517	TIGRP2P75939_rs8744537	3	-1
V3276	5	84658291	84681952	-2.9238	23662	35443	35445	BICF2P1242649	BICF2P1276772	3	-1
V3296	5	84658291	84681952	-3.44096	23662	35443	35445	BICF2P1242649	BICF2P1276772	3	-1
V3298	5	84658291	84681952	-0.97753	23662	35443	35445	BICF2P1242649	BICF2P1276772	3	-1
V3270	5	85257977	85281442	-2.33406	23466	35490	35492	BICF2P1219736	BICF2P130700	3	-1
V3291	5	85257977	85281442	-2.6977	23466	35490	35492	BICF2P1219736	BICF2P130700	3	-1
V3292	5	85257977	85281442	-2.68131	23466	35490	35492	BICF2P1219736	BICF2P130700	3	-1
V3295	5	85257977	85281442	-2.24054	23466	35490	35492	BICF2P1219736	BICF2P130700	3	-1
V3287	5	85474622	85515070	-3.70658	40449	35508	35510	BICF2S23312942	BICF2S23756076	3	-1
V3256	5	85671611	85698410	-2.76915	26800	35524	35526	BICF2P1329997	BICF2S23755824	3	-1
V3254	5	88867447	88908300	-1.47958	40854	35792	35794	BICF2S23529696	BICF2P798075	3	-1
V3267	5	88867447	88908300	-1.4636	40854	35792	35794	BICF2S23529696	BICF2P798075	3	-1
V3269	5	88867447	88908300	-1.54745	40854	35792	35794	BICF2S23529696	BICF2P798075	3	-1
V3273	5	88867447	88908300	-1.47231	40854	35792	35794	BICF2S23529696	BICF2P798075	3	-1
V3280	6	48930	780274	-0.208706	731345	35795	35823	BICF2G630807302	BICF2G630807482	29	-1
V3296	6	48930	806126	-0.161736	757197	35795	35824	BICF2G630807302	BICF2G630807484	30	-1
V3256	6	48930	903602	-0.183543	854673	35795	35829	BICF2G630807302	BICF2G630807513	35	-1
V3275	6	9508130	9534556	-1.82101	26427	36511	36513	BICF2P631013	BICF2P1266835	3	-1
V3291	6	9526807	9541008	-1.76957	14202	36512	36514	BICF2P666214	BICF2P125690	3	-1
V3268	6	9534556	9554081	-1.98591	19526	36513	36515	BICF2P1266835	TIGRP2P78173_rs8572320	3	-1
V3297	6	9534556	9554081	-1.85306	19526	36513	36515	BICF2P1266835	TIGRP2P78173_rs8572320	3	-1
V3296	6	12595818	12630122	-0.663501	34305	36751	36753	BICF2P1181620	BICF2S23432256	3	-1
V3267	6	13392914	13421628	-1.94908	28715	36820	36822	TIGRP2P79374_rs8668113	TIGRP2P79384_rs9045956	3	-1
V3268	6	13392914	13421628	-2.14334	28715	36820	36822	TIGRP2P79374_rs8668113	TIGRP2P79384_rs9045956	3	-1
V3275	6	13392914	13421628	-1.83797	28715	36820	36822	TIGRP2P79374_rs8668113	TIGRP2P79384_rs9045956	3	-1
V3296	6	13392914	13421628	-0.756644	28715	36820	36822	TIGRP2P79374_rs8668113	TIGRP2P79384_rs9045956	3	-1
V3297	6	13392914	13421628	-1.83825	28715	36820	36822	TIGRP2P79374_rs8668113	TIGRP2P79384_rs9045956	3	-1
V3256	6	22580400	22610348	-2.94364	29949	37545	37547	BICF2S23510273	BICF2P134996	3	-1
V3275	6	22580400	22610348	-2.66427	29949	37545	37547	BICF2S23510273	BICF2P134996	3	-1
V3280	6	22580400	22610348	-3.24765	29949	37545	37547	BICF2S23510273	BICF2P134996	3	-1
V3291	6	22580400	22610348	-2.27551	29949	37545	37547	BICF2S23510273	BICF2P134996	3	-1
V3292	6	22580400	22610348	-2.41758	29949	37545	37547	BICF2S23510273	BICF2P134996	3	-1
V3293	6	22580400	22610348	-3.25499	29949	37545	37547	BICF2S23510273	BICF2P134996	3	-1
V3296	6	22580400	22610348	-2.29555	29949	37545	37547	BICF2S23510273	BICF2P134996	3	-1
V3297	6	22580400	22610348	-2.39691	29949	37545	37547	BICF2S23510273	BICF2P134996	3	-1
V3252	6	22589387	22617648	-2.69007	28262	37546	37548	BICF2P524687	BICF2P326907	3	-1
V3254	6	22589387	22617648	-3.08353	28262	37546	37548	BICF2P524687	BICF2P326907	3	-1
V3261	6	22589387	22617648	-2.83427	28262	37546	37548	BICF2P524687	BICF2P326907	3	-1
V3267	6	22589387	22617648	-2.45043	28262	37546	37548	BICF2P524687	BICF2P326907	3	-1
V3268	6	22589387	22617648	-2.61992	28262	37546	37548	BICF2P524687	BICF2P326907	3	-1
V3269	6	22589387	22617648	-2.48495	28262	37546	37548	BICF2P524687	BICF2P326907	3	-1
V3271	6	22589387	22617648	-2.7549	28262	37546	37548	BICF2P524687	BICF2P326907	3	-1
V3273	6	22589387	22617648	-2.44745	28262	37546	37548	BICF2P524687	BICF2P326907	3	-1
V3276	6	22589387	22617648	-2.51598	28262	37546	37548	BICF2P524687	BICF2P326907	3	-1
V3279	6	22589387	22617648	-2.41957	28262	37546	37548	BICF2P524687	BICF2P326907	3	-1
V3289	6	22589387	22617648	-2.65535	28262	37546	37548	BICF2P524687	BICF2P326907	3	-1
V3280	6	31526376	31552506	-0.792708	26131	38195	38197	BICF2G630584326	BICF2G630584311	3	-1
V3285	6	31526376	31552506	-1.93149	26131	38195	38197	BICF2G630584326	BICF2G630584311	3	-1
V3289	6	31526376	31552506	-1.76886	26131	38195	38197	BICF2G630584326	BICF2G630584311	3	-1
V3252	6	33322866	33348674	-0.712747	25809	38345	38347	BICF2P955217	BICF2P688184	3	-1
V3254	6	33322866	33348674	-0.733285	25809	38345	38347	BICF2P955217	BICF2P688184	3	-1
V3296	6	33322866	33348674	-0.651562	25809	38345	38347	BICF2P955217	BICF2P688184	3	-1
V3254	6	39380812	40232810	-0.33833	851999	38794	38854	BICF2S23028404	TIGRP2P82676_rs8871439	61	-1
V3295	6	39380812	40261501	-0.420542	880690	38794	38855	BICF2S23028404	BICF2S2364709	62	-1
V3279	6	39393380	40261501	-0.444202	868122	38795	38855	BICF2S23210218	BICF2S2364709	61	-1
V3297	6	39482383	40261501	-0.296078	779119	38803	38855	TIGRP2P82574_rs8910870	BICF2S2364709	53	-1
V3252	6	39492415	40261501	-0.342385	769087	38804	38855	BICF2P272231	BICF2S2364709	52	-1
V3280	6	39549505	40232810	-0.339264	683306	38809	38854	TIGRP2P82596_rs9115315	TIGRP2P82676_rs8871439	46	-1
V3296	6	39583813	40232810	-0.266103	648998	38812	38854	BICF2P460357	TIGRP2P82676_rs8871439	43	-1
V3267	6	46097385	46123618	-1.9836	26234	39286	39288	BICF2G630580536	TIGRP2P84030_rs8652786	3	-1
V3252	6	46477607	46501950	-2.16351	24344	39319	39321	BICF2G630580026	BICF2G630580024	3	-1
V3256	6	46477607	46501950	-2.31494	24344	39319	39321	BICF2G630580026	BICF2G630580024	3	-1
V3261	6	46477607	46501950	-2.27267	24344	39319	39321	BICF2G630580026	BICF2G630580024	3	-1
V3269	6	46477607	46501950	-1.85711	24344	39319	39321	BICF2G630580026	BICF2G630580024	3	-1
V3270	6	46477607	46501950	-1.94289	24344	39319	39321	BICF2G630580026	BICF2G630580024	3	-1
V3271	6	46477607	46501950	-2.14043	24344	39319	39321	BICF2G630580026	BICF2G630580024	3	-1
V3273	6	46477607	46501950	-2.54305	24344	39319	39321	BICF2G630580026	BICF2G630580024	3	-1
V3275	6	46477607	46501950	-2.11691	24344	39319	39321	BICF2G630580026	BICF2G630580024	3	-1
V3279	6	46477607	46501950	-1.96922	24344	39319	39321	BICF2G630580026	BICF2G630580024	3	-1
V3280	6	46477607	46501950	-2.40232	24344	39319	39321	BICF2G630580026	BICF2G630580024	3	-1
V3285	6	46477607	46501950	-2.03583	24344	39319	39321	BICF2G630580026	BICF2G630580024	3	-1
V3286	6	46477607	46501950	-2.04931	24344	39319	39321	BICF2G630580026	BICF2G630580024	3	-1
V3295	6	46477607	46501950	-2.21211	24344	39319	39321	BICF2G630580026	BICF2G630580024	3	-1
V3296	6	46477607	46501950	-2.56086	24344	39319	39321	BICF2G630580026	BICF2G630580024	3	-1
V3297	6	46477607	46501950	-1.86229	24344	39319	39321	BICF2G630580026	BICF2G630580024	3	-1
V3298	6	46477607	46501950	-2.12066	24344	39319	39321	BICF2G630580026	BICF2G630580024	3	-1
V3268	6	46488810	46521359	-2.15551	32550	39320	39322	TIGRP2P84098_rs8763809	BICF2P233539	3	-1
V3276	6	46488810	46521359	-2.60885	32550	39320	39322	TIGRP2P84098_rs8763809	BICF2P233539	3	-1
V3278	6	46488810	46521359	-2.34618	32550	39320	39322	TIGRP2P84098_rs8763809	BICF2P233539	3	-1
V3289	6	46488810	46521359	-2.37231	32550	39320	39322	TIGRP2P84098_rs8763809	BICF2P233539	3	-1
V3291	6	46488810	46521359	-2.34359	32550	39320	39322	TIGRP2P84098_rs8763809	BICF2P233539	3	-1
V3256	6	57319507	57385268	-0.694277	65762	40182	40187	BICF2P1065711	BICF2P596498	6	-1
V3254	6	59162132	59180393	-1.73673	18262	40328	40330	BICF2P399377	BICF2P408260	3	-1
V3273	6	65496597	65523436	-1.64639	26840	40811	40813	BICF2G630572729	BICF2P809655	3	-1
V3285	6	65496597	65523436	-1.64172	26840	40811	40813	BICF2G630572729	BICF2P809655	3	-1
V3252	6	75519453	75543492	-2.6292	24040	41629	41631	BICF2P232749	BICF2P1087067	3	-1
V3268	6	75519453	75543492	-2.23469	24040	41629	41631	BICF2P232749	BICF2P1087067	3	-1
V3270	6	75519453	75543492	-2.35839	24040	41629	41631	BICF2P232749	BICF2P1087067	3	-1
V3286	6	75519453	75543492	-2.26266	24040	41629	41631	BICF2P232749	BICF2P1087067	3	-1
V3289	6	75519453	75543492	-2.14257	24040	41629	41631	BICF2P232749	BICF2P1087067	3	-1
V3296	6	76957965	77570611	-0.174622	612647	41749	41803	BICF2G630570015	TIGRP2P90680_rs8450920	55	-1
V3278	7	416	831328	-0.258791	830913	41804	41853	BICF2S2336345	BICF2P307336	50	-1
V3252	7	416	961257	-0.282296	960842	41804	41865	BICF2S2336345	BICF2P6113	62	-1
V3261	7	416	961257	-0.493665	960842	41804	41865	BICF2S2336345	BICF2P6113	62	-1
V3267	7	416	961257	-0.39327	960842	41804	41865	BICF2S2336345	BICF2P6113	62	-1
V3268	7	416	961257	-0.381396	960842	41804	41865	BICF2S2336345	BICF2P6113	62	-1
V3269	7	416	961257	-0.432468	960842	41804	41865	BICF2S2336345	BICF2P6113	62	-1
V3270	7	416	961257	-0.408501	960842	41804	41865	BICF2S2336345	BICF2P6113	62	-1
V3271	7	416	961257	-0.446492	960842	41804	41865	BICF2S2336345	BICF2P6113	62	-1
V3273	7	416	961257	-0.400013	960842	41804	41865	BICF2S2336345	BICF2P6113	62	-1
V3275	7	416	961257	-0.421201	960842	41804	41865	BICF2S2336345	BICF2P6113	62	-1
V3276	7	416	961257	-0.175926	960842	41804	41865	BICF2S2336345	BICF2P6113	62	-1
V3279	7	416	961257	-0.409572	960842	41804	41865	BICF2S2336345	BICF2P6113	62	-1
V3285	7	416	961257	-0.266726	960842	41804	41865	BICF2S2336345	BICF2P6113	62	-1
V3286	7	416	961257	-0.21855	960842	41804	41865	BICF2S2336345	BICF2P6113	62	-1
V3287	7	416	961257	-0.204955	960842	41804	41865	BICF2S2336345	BICF2P6113	62	-1
V3289	7	416	961257	-0.258667	960842	41804	41865	BICF2S2336345	BICF2P6113	62	-1
V3292	7	416	961257	-0.421118	960842	41804	41865	BICF2S2336345	BICF2P6113	62	-1
V3293	7	416	961257	-0.402192	960842	41804	41865	BICF2S2336345	BICF2P6113	62	-1
V3295	7	416	961257	-0.406647	960842	41804	41865	BICF2S2336345	BICF2P6113	62	-1
V3298	7	416	961257	-0.348865	960842	41804	41865	BICF2S2336345	BICF2P6113	62	-1
V3256	7	836217	871741	-1.11257	35525	41854	41857	BICF2P607865	BICF2P501390	4	-1
V3278	7	836217	871741	-1.50633	35525	41854	41857	BICF2P607865	BICF2P501390	4	-1
V3286	7	10628876	10647583	-1.45458	18708	42584	42586	BICF2P1162367	BICF2S23529925	3	-1
V3270	7	10635348	10676430	-1.61578	41083	42585	42587	BICF2P689636	BICF2S23351877	3	-1
V3279	7	10635348	10676430	-1.56775	41083	42585	42587	BICF2P689636	BICF2S23351877	3	-1
V3280	7	10635348	10676430	-1.53541	41083	42585	42587	BICF2P689636	BICF2S23351877	3	-1
V3269	7	19231231	19269183	-2.10803	37953	43283	43285	BICF2P550435	BICF2S23127832	3	-1
V3261	7	30263185	30289697	-2.14515	26513	44081	44083	BICF2S23424917	BICF2G630555972	3	-1
V3293	7	30263185	30289697	-1.82336	26513	44081	44083	BICF2S23424917	BICF2G630555972	3	-1
V3256	7	43564463	43574075	-1.91565	9613	45063	45065	BICF2P403596	BICF2P322957	3	-1
V3261	7	43564463	43574075	-2.00709	9613	45063	45065	BICF2P403596	BICF2P322957	3	-1
V3267	7	43564463	43574075	-1.75401	9613	45063	45065	BICF2P403596	BICF2P322957	3	-1
V3278	7	43564463	43574075	-2.02667	9613	45063	45065	BICF2P403596	BICF2P322957	3	-1
V3293	7	43564463	43574075	-1.89368	9613	45063	45065	BICF2P403596	BICF2P322957	3	-1
V3269	7	45464549	45495031	-2.08028	30483	45218	45220	BICF2P262369	BICF2P378560	3	-1
V3297	7	45464549	45495031	-1.9882	30483	45218	45220	BICF2P262369	BICF2P378560	3	-1
V3276	7	57076741	57105824	-1.60696	29084	46125	46128	BICF2P256492	BICF2G630560835	4	-1
V3295	7	57076741	57105824	-1.47702	29084	46125	46128	BICF2P256492	BICF2G630560835	4	-1
V3252	7	61029355	61046990	-2.30279	17636	46459	46461	BICF2P548704	BICF2G630563327	3	-1
V3254	7	61029355	61046990	-2.32698	17636	46459	46461	BICF2P548704	BICF2G630563327	3	-1
V3287	7	61029355	61046990	-2.04811	17636	46459	46461	BICF2P548704	BICF2G630563327	3	-1
V3292	7	61029355	61046990	-2.05927	17636	46459	46461	BICF2P548704	BICF2G630563327	3	-1
V3276	7	67702761	67726356	-1.9764	23596	47007	47009	BICF2S23752727	BICF2G63084919	3	-1
V3273	7	75374260	75397834	-1.69703	23575	47625	47627	BICF2P646016	BICF2P921780	3	-1
V3292	7	75374260	75397834	-1.72593	23575	47625	47627	BICF2P646016	BICF2P921780	3	-1
V3289	7	79989934	80017081	-2.24199	27148	48008	48010	BICF2G63088103	BICF2G63088115	3	-1
V3256	8	9287892	9316645	-1.76702	28754	48761	48764	BICF2P453604	TIGRP2P107099_rs8541544	4	-1
V3286	8	9287892	9316645	-1.52361	28754	48761	48764	BICF2P453604	TIGRP2P107099_rs8541544	4	-1
V3293	8	9287892	9316645	-1.56611	28754	48761	48764	BICF2P453604	TIGRP2P107099_rs8541544	4	-1
V3295	8	9287892	9316645	-1.60256	28754	48761	48764	BICF2P453604	TIGRP2P107099_rs8541544	4	-1
V3269	8	9755675	9842223	-2.28913	86549	48794	48799	BICF2P502010	BICF2P25857	6	-1
V3273	8	9755675	9842223	-1.96855	86549	48794	48799	BICF2P502010	BICF2P25857	6	-1
V3276	8	9755675	9842223	-2.23881	86549	48794	48799	BICF2P502010	BICF2P25857	6	-1
V3256	8	19962588	20004749	-1.68774	42162	49510	49512	TIGRP2P109199_rs8828717	BICF2S23153664	3	-1
V3287	8	26532107	26573597	-1.68233	41491	49975	49977	BICF2S23547360	BICF2P1271039	3	-1
V3269	8	32622155	32651892	-2.23616	29738	50411	50413	BICF2P100704	BICF2P839250	3	-1
V3275	8	32622155	32651892	-2.35035	29738	50411	50413	BICF2P100704	BICF2P839250	3	-1
V3291	8	32622155	32651892	-2.08146	29738	50411	50413	BICF2P100704	BICF2P839250	3	-1
V3295	8	32622155	32651892	-2.38277	29738	50411	50413	BICF2P100704	BICF2P839250	3	-1
V3296	8	32622155	32651892	-2.00132	29738	50411	50413	BICF2P100704	BICF2P839250	3	-1
V3297	8	32622155	32651892	-2.29209	29738	50411	50413	BICF2P100704	BICF2P839250	3	-1
V3298	8	32622155	32651892	-2.0025	29738	50411	50413	BICF2P100704	BICF2P839250	3	-1
V3296	8	50691560	50733329	-2.61811	41770	51669	51671	BICF2P79877	BICF2P707364	3	-1
V3293	8	56183437	56200662	-1.7785	17226	52029	52031	BICF2P919516	BICF2S23125604	3	-1
V3287	8	62527811	62546498	-1.60834	18688	52479	52481	TIGRP2P118380_rs8742782	BICF2S23633842	3	-1
V3298	8	65616959	65640116	-2.07883	23158	52713	52715	BICF2P88269	BICF2P1468530	3	-1
V3278	9	3493	909141	-0.22855	905649	53247	53309	BICF2P309837	TIGRP2P244726_rs8678790	63	-1
V3280	9	3493	909141	-0.168919	905649	53247	53309	BICF2P309837	TIGRP2P244726_rs8678790	63	-1
V3278	9	916372	997748	-1.04036	81377	53310	53317	BICF2P801989	TIGRP2P244718_rs8924886	8	-1
V3280	9	916372	997748	-0.924895	81377	53310	53317	BICF2P801989	TIGRP2P244718_rs8924886	8	-1
V3261	9	28441048	28455135	-2.10167	14088	55132	55134	BICF2P343539	BICF2P572850	3	-1
V3276	9	28441048	28455135	-1.87747	14088	55132	55134	BICF2P343539	BICF2P572850	3	-1
V3293	9	28441048	28455135	-2.10763	14088	55132	55134	BICF2P343539	BICF2P572850	3	-1
V3279	9	29130393	29148014	-1.89879	17622	55187	55189	BICF2G630833538	BICF2G630833560	3	-1
V3287	9	35439263	36278474	-0.258298	839212	55650	55702	BICF2G630836674	TIGRP2P126305_rs8829062	53	-1
V3298	9	35439263	36391953	-0.408021	952691	55650	55712	BICF2G630836674	BICF2G630837077	63	-1
V3291	9	35451903	36391953	-0.273405	940051	55651	55712	BICF2P803368	BICF2G630837077	62	-1
V3275	9	35550363	36302228	-0.278297	751866	55659	55704	BICF2G630836734	BICF2G630836974	46	-1
V3273	9	35550363	36391953	-0.339918	841591	55659	55712	BICF2G630836734	BICF2G630837077	54	-1
V3267	9	35626085	35673248	-4.4046	47164	55664	55666	BICF2P1422473	BICF2P1147626	3	-1
V3270	9	35626085	35673248	-1.54257	47164	55664	55666	BICF2P1422473	BICF2P1147626	3	-1
V3252	9	35643125	36477682	-0.350383	834558	55665	55716	BICF2G630836754	BICF2P1058910	52	-1
V3270	9	35682510	36278474	-0.177194	595965	55667	55702	BICF2G630836769	TIGRP2P126305_rs8829062	36	-1
V3254	9	35872689	35920466	-4.24318	47778	55677	55679	BICF2S2458527	BICF2G630836860	3	-1
V3276	9	36040587	36061779	-3.23504	21193	55688	55690	BICF2P1331734	BICF2G630836904	3	-1
V3256	9	36046668	36088008	-3.09321	41341	55689	55691	BICF2G630836889	BICF2G630836919	3	-1
V3285	9	36046668	36088008	-2.54785	41341	55689	55691	BICF2G630836889	BICF2G630836919	3	-1
V3297	9	36046668	36088008	-2.66029	41341	55689	55691	BICF2G630836889	BICF2G630836919	3	-1
V3278	9	36220700	36391953	-0.623051	171254	55699	55712	BICF2G630836945	BICF2G630837077	14	-1
V3267	9	36229022	36333983	-0.832507	104962	55700	55707	BICF2G630836951	BICF2G630836989	8	-1
V3280	9	36229022	36333983	-1.09799	104962	55700	55707	BICF2G630836951	BICF2G630836989	8	-1
V3261	9	36288858	36333983	-1.4764	45126	55703	55707	BICF2P28144	BICF2G630836989	5	-1
V3268	9	36288858	36333983	-1.13004	45126	55703	55707	BICF2P28144	BICF2G630836989	5	-1
V3269	9	36288858	36333983	-1.92647	45126	55703	55707	BICF2P28144	BICF2G630836989	5	-1
V3270	9	36288858	36333983	-1.40872	45126	55703	55707	BICF2P28144	BICF2G630836989	5	-1
V3279	9	36288858	36333983	-2.14556	45126	55703	55707	BICF2P28144	BICF2G630836989	5	-1
V3287	9	36288858	36333983	-1.35376	45126	55703	55707	BICF2P28144	BICF2G630836989	5	-1
V3292	9	36288858	36333983	-3.23474	45126	55703	55707	BICF2P28144	BICF2G630836989	5	-1
V3295	9	36288858	36333983	-1.51448	45126	55703	55707	BICF2P28144	BICF2G630836989	5	-1
V3296	9	36288858	36391953	-0.824323	103096	55703	55712	BICF2P28144	BICF2G630837077	10	-1
V3271	9	36308946	36333983	-3.77209	25038	55705	55707	BICF2G630836979	BICF2G630836989	3	-1
V3275	9	36308946	36333983	-5.38451	25038	55705	55707	BICF2G630836979	BICF2G630836989	3	-1
V3289	9	36379785	36444206	-3.91214	64422	55711	55713	BICF2G630837065	BICF2S23321769	3	-1
V3252	9	38973520	38988684	-2.79367	15165	55881	55883	BICF2S2335873	BICF2S2376764	3	-1
V3286	9	38973520	38988684	-0.904519	15165	55881	55883	BICF2S2335873	BICF2S2376764	3	-1
V3287	9	38973520	38988684	-0.8975	15165	55881	55883	BICF2S2335873	BICF2S2376764	3	-1
V3287	9	40935226	41055266	-0.394861	120041	56031	56039	BICF2S23217	BICF2G630840400	9	-1
V3271	9	48891617	48927437	-1.5051	35821	56625	56627	BICF2S2378118	BICF2S2328598	3	-1
V3278	9	48891617	48927437	-1.2413	35821	56625	56627	BICF2S2378118	BICF2S2328598	3	-1
V3256	9	50999629	51020047	-2.06644	20419	56807	56809	BICF2P770237	BICF2P526893	3	-1
V3269	9	50999629	51020047	-2.15815	20419	56807	56809	BICF2P770237	BICF2P526893	3	-1
V3271	9	50999629	51020047	-2.12431	20419	56807	56809	BICF2P770237	BICF2P526893	3	-1
V3279	9	50999629	51020047	-2.09342	20419	56807	56809	BICF2P770237	BICF2P526893	3	-1
V3280	9	50999629	51020047	-1.95669	20419	56807	56809	BICF2P770237	BICF2P526893	3	-1
V3285	9	50999629	51020047	-1.83595	20419	56807	56809	BICF2P770237	BICF2P526893	3	-1
V3293	9	50999629	51020047	-1.93624	20419	56807	56809	BICF2P770237	BICF2P526893	3	-1
V3287	9	56309152	56363939	-0.913566	54788	57240	57242	BICF2G630474655	BICF2P357957	3	-1
V3292	10	7705978	7720636	-2.30867	14659	57979	57981	BICF2P1433273	BICF2P330949	3	-1
V3296	10	7705978	7720636	-2.1114	14659	57979	57981	BICF2P1433273	BICF2P330949	3	-1
V3293	10	16785414	17193557	-0.396157	408144	58609	58637	BICF2P271043	G587f34S290	29	-1
V3295	10	16785414	17193557	-0.361078	408144	58609	58637	BICF2P271043	G587f34S290	29	-1
V3268	10	17172641	17284700	-1.56151	112060	58636	58640	BICF2P647101	BICF2P376281	5	-1
V3270	10	17172641	17284700	-1.56992	112060	58636	58640	BICF2P647101	BICF2P376281	5	-1
V3271	10	17172641	17284700	-1.5554	112060	58636	58640	BICF2P647101	BICF2P376281	5	-1
V3273	10	17172641	17284700	-1.60185	112060	58636	58640	BICF2P647101	BICF2P376281	5	-1
V3269	10	17213229	17284700	-1.98672	71472	58638	58640	BICF2G630476139	BICF2P376281	3	-1
V3293	10	17213229	17284700	-1.8248	71472	58638	58640	BICF2G630476139	BICF2P376281	3	-1
V3295	10	17213229	17284700	-1.74951	71472	58638	58640	BICF2G630476139	BICF2P376281	3	-1
V3293	10	17299422	18194980	-0.192093	895559	58641	58714	BICF2G630476142	BICF2G630477022	74	-1
V3295	10	17299422	18194980	-0.170444	895559	58641	58714	BICF2G630476142	BICF2G630477022	74	-1
V3293	10	18198833	18220792	-1.50626	21960	58715	58717	BICF2S23548656	BICF2G630477032	3	-1
V3295	10	18198833	18220792	-1.51397	21960	58715	58717	BICF2S23548656	BICF2G630477032	3	-1
V3275	10	22893499	22917462	-4.67218	23964	59090	59092	BICF2P458474	TIGRP2P138930_rs8593506	3	-1
V3279	10	22893499	22917462	-5.01816	23964	59090	59092	BICF2P458474	TIGRP2P138930_rs8593506	3	-1
V3295	10	28562964	28577146	-1.32903	14183	59498	59500	BICF2G630481975	BICF2P25510	3	-1
V3293	10	32081669	32095793	-1.85054	14125	59775	59777	BICF2P357488	BICF2P750895	3	-1
V3293	10	52294606	52317850	-1.34965	23245	61356	61358	BICF2G630489877	BICF2G630489897	3	-1
V3261	11	1170983	1188042	-0.859921	17060	62670	62672	BICF2S23514671	BICF2S24116836	3	-1
V3295	11	1170983	1188042	-0.590578	17060	62670	62672	BICF2S23514671	BICF2S24116836	3	-1
V3287	11	5007687	5031782	-0.565417	24096	62862	62864	BICF2S23049486	BICF2P969729	3	-1
V3268	11	5021174	5068955	-0.884321	47782	62863	62865	TIGRP2P149892_rs9090105	BICF2P1019749	3	-1
V3252	11	5031782	5081219	-0.767132	49438	62864	62866	BICF2P969729	BICF2S23037144	3	-1
V3261	11	5031782	5081219	-0.885429	49438	62864	62866	BICF2P969729	BICF2S23037144	3	-1
V3269	11	5031782	5081219	-0.695468	49438	62864	62866	BICF2P969729	BICF2S23037144	3	-1
V3270	11	5031782	5081219	-0.937656	49438	62864	62866	BICF2P969729	BICF2S23037144	3	-1
V3273	11	5031782	5081219	-0.89567	49438	62864	62866	BICF2P969729	BICF2S23037144	3	-1
V3275	11	5031782	5081219	-0.984188	49438	62864	62866	BICF2P969729	BICF2S23037144	3	-1
V3286	11	5031782	5081219	-0.831167	49438	62864	62866	BICF2P969729	BICF2S23037144	3	-1
V3292	11	5031782	5081219	-0.701014	49438	62864	62866	BICF2P969729	BICF2S23037144	3	-1
V3295	11	5031782	5081219	-0.858191	49438	62864	62866	BICF2P969729	BICF2S23037144	3	-1
V3298	11	5031782	5081219	-0.818942	49438	62864	62866	BICF2P969729	BICF2S23037144	3	-1
V3273	11	16521920	16546389	-1.54917	24470	63454	63456	BICF2G630295152	BICF2S2344073	3	-1
V3276	11	16537739	16560104	-1.72988	22366	63455	63457	BICF2G630295168	BICF2G630295198	3	-1
V3267	11	22232925	22258742	-0.69988	25818	63879	63882	BICF2G630297123	BICF2G630297140	4	-1
V3268	11	22232925	22258742	-0.738199	25818	63879	63882	BICF2G630297123	BICF2G630297140	4	-1
V3269	11	22232925	22258742	-0.712525	25818	63879	63882	BICF2G630297123	BICF2G630297140	4	-1
V3270	11	22232925	22258742	-0.772175	25818	63879	63882	BICF2G630297123	BICF2G630297140	4	-1
V3261	11	22236983	22258742	-0.910806	21760	63880	63882	BICF2P1339679	BICF2G630297140	3	-1
V3271	11	22236983	22258742	-0.850822	21760	63880	63882	BICF2P1339679	BICF2G630297140	3	-1
V3273	11	22236983	22258742	-0.918639	21760	63880	63882	BICF2P1339679	BICF2G630297140	3	-1
V3275	11	22236983	22258742	-0.8371	21760	63880	63882	BICF2P1339679	BICF2G630297140	3	-1
V3279	11	22236983	22258742	-0.776844	21760	63880	63882	BICF2P1339679	BICF2G630297140	3	-1
V3292	11	22236983	22258742	-0.754524	21760	63880	63882	BICF2P1339679	BICF2G630297140	3	-1
V3293	11	22236983	22258742	-0.752759	21760	63880	63882	BICF2P1339679	BICF2G630297140	3	-1
V3295	11	22236983	22258742	-0.691085	21760	63880	63882	BICF2P1339679	BICF2G630297140	3	-1
V3286	11	29524867	29545718	0.658599	20852	64364	64366	TIGRP2P148825_rs9197535	BICF2P867682	3	1
V3287	11	29524867	29545718	0.655112	20852	64364	64366	TIGRP2P148825_rs9197535	BICF2P867682	3	1
V3293	11	31521413	31579439	-1.08433	58027	64489	64491	BICF2P86650	BICF2P61438	3	-1
V3252	11	35650072	35691390	-1.15245	41319	64775	64777	BICF2P1105439	BICF2P317662	3	-1
V3256	11	35650072	35691390	-1.19873	41319	64775	64777	BICF2P1105439	BICF2P317662	3	-1
V3261	11	35650072	35691390	-1.26741	41319	64775	64777	BICF2P1105439	BICF2P317662	3	-1
V3291	11	35660104	35700572	-0.564589	40469	64776	64778	BICF2P293051	BICF2P939275	3	-1
V3267	11	39223222	39250114	-1.68827	26893	65011	65013	BICF2P353831	BICF2P496690	3	-1
V3268	11	39223222	39250114	-0.675421	26893	65011	65013	BICF2P353831	BICF2P496690	3	-1
V3269	11	39223222	39250114	-0.723584	26893	65011	65013	BICF2P353831	BICF2P496690	3	-1
V3271	11	39223222	39250114	-1.66845	26893	65011	65013	BICF2P353831	BICF2P496690	3	-1
V3273	11	39223222	39250114	-1.72337	26893	65011	65013	BICF2P353831	BICF2P496690	3	-1
V3278	11	39223222	39250114	-1.6635	26893	65011	65013	BICF2P353831	BICF2P496690	3	-1
V3286	11	39223222	39250114	-0.619905	26893	65011	65013	BICF2P353831	BICF2P496690	3	-1
V3289	11	39223222	39250114	-0.722648	26893	65011	65013	BICF2P353831	BICF2P496690	3	-1
V3292	11	39223222	39250114	-1.57177	26893	65011	65013	BICF2P353831	BICF2P496690	3	-1
V3298	11	39223222	39250114	-1.60731	26893	65011	65013	BICF2P353831	BICF2P496690	3	-1
V3256	11	39242040	39263174	-0.756572	21135	65012	65014	BICF2P71569	BICF2P923218	3	-1
V3280	11	39242040	39263174	-0.733381	21135	65012	65014	BICF2P71569	BICF2P923218	3	-1
V3291	11	39242040	39263174	-1.6088	21135	65012	65014	BICF2P71569	BICF2P923218	3	-1
V3296	11	39242040	39263174	-1.65913	21135	65012	65014	BICF2P71569	BICF2P923218	3	-1
V3297	11	39242040	39263174	-1.64247	21135	65012	65014	BICF2P71569	BICF2P923218	3	-1
V3261	11	45078624	45122774	-0.770866	44151	65438	65440	BICF2P1278043	BICF2P199426	3	-1
V3268	11	45078624	45122774	-0.695222	44151	65438	65440	BICF2P1278043	BICF2P199426	3	-1
V3275	11	45078624	45122774	-0.733543	44151	65438	65440	BICF2P1278043	BICF2P199426	3	-1
V3286	11	45109264	45139324	-0.582141	30061	65439	65441	BICF2S23650418	BICF2P198758	3	-1
V3295	11	45109264	45139324	-0.63456	30061	65439	65441	BICF2S23650418	BICF2P198758	3	-1
V3278	11	47591006	47617053	-0.779669	26048	65586	65589	BICF2P781699	BICF2P123144	4	-1
V3256	11	50357487	50470281	-0.928212	112795	65752	65754	BICF2P297619	BICF2S23158671	3	-1
V3280	11	50357487	50470281	-0.866696	112795	65752	65754	BICF2P297619	BICF2S23158671	3	-1
V3291	11	53451483	53681610	0.290551	230128	65924	65937	BICF2S23220226	BICF2S23547355	14	1
V3280	11	55358502	55394266	-0.721875	35765	66049	66051	BICF2S23118349	BICF2P637856	3	-1
V3256	11	58165531	58186399	-2.16313	20869	66269	66271	BICF2G630302368	BICF2P940896	3	-1
V3293	11	60456295	60466043	-0.653004	9749	66460	66462	BICF2G630304616	BICF2P75649	3	-1
V3269	11	61205870	61227881	-0.559887	22012	66531	66533	BICF2G630305332	BICF2G630305353	3	-1
V3252	11	63326869	63346918	-0.641169	20050	66722	66724	BICF2P313034	BICF2S23714179	3	-1
V3286	11	64443259	64484882	-1.64423	41624	66825	66827	BICF2P142714	BICF2P171344	3	-1
V3287	11	66453369	66481133	-0.713396	27765	66997	66999	TIGRP2P152190_rs9248757	TIGRP2P152207_rs8649738	3	-1
V3267	11	66481133	66508356	-0.74394	27224	66999	67001	TIGRP2P152207_rs8649738	BICF2S23023483	3	-1
V3271	11	66481133	66508356	-0.767459	27224	66999	67001	TIGRP2P152207_rs8649738	BICF2S23023483	3	-1
V3276	11	66481133	66508356	-0.801089	27224	66999	67001	TIGRP2P152207_rs8649738	BICF2S23023483	3	-1
V3296	11	66481133	66508356	-0.817672	27224	66999	67001	TIGRP2P152207_rs8649738	BICF2S23023483	3	-1
V3254	11	67919301	67954720	-0.611414	35420	67105	67107	BICF2S23538318	BICF2S22944567	3	-1
V3291	11	67919301	67954720	-0.60536	35420	67105	67107	BICF2S23538318	BICF2S22944567	3	-1
V3280	11	67919301	67960705	-0.643441	41405	67105	67108	BICF2S23538318	TIGRP2P152593_rs8812362	4	-1
V3280	11	74222276	74277993	-0.421586	55718	67649	67655	BICF2S23521294	BICF2P3948	7	-1
V3298	12	799527	819768	-1.75611	20242	67729	67731	BICF2P248997	BICF2P496850	3	-1
V3285	12	2176422	2214003	-1.23918	37582	67842	67844	BICF2P157826	BICF2S23225431	3	-1
V3297	12	4393386	4426843	-0.784193	33458	68006	68008	TIGRP2P167891_rs8747050	BICF2P1417134	3	-1
V3269	12	4411692	4430094	-1.10565	18403	68007	68009	BICF2P96079	TIGRP2P167894_rs9150645	3	-1
V3270	12	4411692	4430094	-1.14001	18403	68007	68009	BICF2P96079	TIGRP2P167894_rs9150645	3	-1
V3273	12	4411692	4430094	-0.977435	18403	68007	68009	BICF2P96079	TIGRP2P167894_rs9150645	3	-1
V3278	12	7549965	7576867	-1.81194	26903	68244	68246	TIGRP2P156095_rs8564987	TIGRP2P156100_rs8987991	3	-1
V3286	12	7549965	7576867	-2.08212	26903	68244	68246	TIGRP2P156095_rs8564987	TIGRP2P156100_rs8987991	3	-1
V3296	12	13578327	13610726	-1.53476	32400	68731	68733	TIGRP2P157817_rs8713315	BICF2P497920	3	-1
V3297	12	13578327	13610726	-1.49294	32400	68731	68733	TIGRP2P157817_rs8713315	BICF2P497920	3	-1
V3254	12	15662198	15700110	-2.24463	37913	68923	68925	BICF2P326140	BICF2P372848	3	-1
V3287	12	15662198	15700110	-2.21259	37913	68923	68925	BICF2P326140	BICF2P372848	3	-1
V3292	12	15662198	15700110	-2.27049	37913	68923	68925	BICF2P326140	BICF2P372848	3	-1
V3298	12	16504214	16542230	-0.814807	38017	68991	68993	BICF2S23736651	BICF2P535715	3	-1
V3276	12	18862172	18882682	-2.20606	20511	69168	69170	TIGRP2P159658_rs8887487	BICF2P1506542	3	-1
V3256	12	19086811	19102995	-1.76721	16185	69189	69191	BICF2S23446810	BICF2P818037	3	-1
V3261	12	19086811	19102995	-1.7215	16185	69189	69191	BICF2S23446810	BICF2P818037	3	-1
V3270	12	19086811	19102995	-1.86451	16185	69189	69191	BICF2S23446810	BICF2P818037	3	-1
V3273	12	19086811	19102995	-1.79101	16185	69189	69191	BICF2S23446810	BICF2P818037	3	-1
V3291	12	19086811	19102995	-1.75105	16185	69189	69191	BICF2S23446810	BICF2P818037	3	-1
V3295	12	19086811	19102995	-1.68036	16185	69189	69191	BICF2S23446810	BICF2P818037	3	-1
V3298	12	19086811	19102995	-1.66582	16185	69189	69191	BICF2S23446810	BICF2P818037	3	-1
V3269	12	20315993	20337721	-1.25005	21729	69297	69299	BICF2P659659	BICF2S23517704	3	-1
V3270	12	20315993	20337721	-1.10542	21729	69297	69299	BICF2P659659	BICF2S23517704	3	-1
V3273	12	20315993	20337721	-0.999625	21729	69297	69299	BICF2P659659	BICF2S23517704	3	-1
V3278	12	32205647	32240648	-1.89901	35002	70159	70161	BICF2P1157867	TIGRP2P162927_rs9136540	3	-1
V3295	12	32232723	32254296	-1.79934	21574	70160	70162	TIGRP2P162926_rs8921290	BICF2P420370	3	-1
V3291	12	37983543	38008354	0.799904	24812	70551	70553	BICF2P1515789	BICF2P302497	3	1
V3289	12	37997412	38020374	0.767785	22963	70552	70554	TIGRP2P163977_rs8758604	BICF2P728193	3	1
V3295	12	37997412	38020374	1.10213	22963	70552	70554	TIGRP2P163977_rs8758604	BICF2P728193	3	1
V3297	12	37997412	38020374	1.11269	22963	70552	70554	TIGRP2P163977_rs8758604	BICF2P728193	3	1
V3298	12	37997412	38020374	0.766748	22963	70552	70554	TIGRP2P163977_rs8758604	BICF2P728193	3	1
V3256	12	43000351	43028990	-1.23632	28640	70928	70930	BICF2S23519765	BICF2S235224	3	-1
V3291	12	49974806	50016546	-0.625761	41741	71434	71438	BICF2P1506734	BICF2P955614	5	-1
V3297	12	49974806	50016546	-0.579676	41741	71434	71438	BICF2P1506734	BICF2P955614	5	-1
V3256	12	50390171	50410506	-2.16867	20336	71468	71470	BICF2S237635	BICF2P349222	3	-1
V3269	12	50390171	50410506	-2.04586	20336	71468	71470	BICF2S237635	BICF2P349222	3	-1
V3295	12	50390171	50410506	-1.90014	20336	71468	71470	BICF2S237635	BICF2P349222	3	-1
V3252	12	50393169	50418534	-2.04323	25366	71469	71471	BICF2S23533416	BICF2P434515	3	-1
V3273	12	50393169	50418534	-1.99876	25366	71469	71471	BICF2S23533416	BICF2P434515	3	-1
V3280	12	50393169	50418534	-1.97668	25366	71469	71471	BICF2S23533416	BICF2P434515	3	-1
V3278	12	50410506	50420824	-2.02649	10319	71470	71472	BICF2P349222	BICF2S23160650	3	-1
V3256	12	57259344	57274600	-2.31645	15257	72011	72013	BICF2P1307064	BICF2G630121296	3	-1
V3276	12	57259344	57274600	-2.16954	15257	72011	72013	BICF2P1307064	BICF2G630121296	3	-1
V3289	12	57259344	57274600	-2.05289	15257	72011	72013	BICF2P1307064	BICF2G630121296	3	-1
V3254	12	57274600	57300319	-2.22487	25720	72013	72015	BICF2G630121296	TIGRP2P169512_rs9008435	3	-1
V3261	12	57274600	57300319	-2.39061	25720	72013	72015	BICF2G630121296	TIGRP2P169512_rs9008435	3	-1
V3267	12	57274600	57300319	-2.2784	25720	72013	72015	BICF2G630121296	TIGRP2P169512_rs9008435	3	-1
V3268	12	57274600	57300319	-2.23439	25720	72013	72015	BICF2G630121296	TIGRP2P169512_rs9008435	3	-1
V3270	12	57274600	57300319	-2.23484	25720	72013	72015	BICF2G630121296	TIGRP2P169512_rs9008435	3	-1
V3271	12	57274600	57300319	-2.53464	25720	72013	72015	BICF2G630121296	TIGRP2P169512_rs9008435	3	-1
V3275	12	57274600	57300319	-2.04875	25720	72013	72015	BICF2G630121296	TIGRP2P169512_rs9008435	3	-1
V3279	12	57274600	57300319	-2.07189	25720	72013	72015	BICF2G630121296	TIGRP2P169512_rs9008435	3	-1
V3287	12	57274600	57300319	-1.89827	25720	72013	72015	BICF2G630121296	TIGRP2P169512_rs9008435	3	-1
V3293	12	57274600	57300319	-1.96134	25720	72013	72015	BICF2G630121296	TIGRP2P169512_rs9008435	3	-1
V3292	12	58023591	58050536	-1.92289	26946	72075	72077	BICF2S22926203	TIGRP2P169733_rs8838812	3	-1
V3269	12	68490038	68521550	-1.07356	31513	72903	72905	BICF2P715523	BICF2P273290	3	-1
V3273	12	68490038	68521550	-1.03735	31513	72903	72905	BICF2P715523	BICF2P273290	3	-1
V3286	12	68490038	68521550	-0.911817	31513	72903	72905	BICF2P715523	BICF2P273290	3	-1
V3289	12	68490038	68521550	-0.830848	31513	72903	72905	BICF2P715523	BICF2P273290	3	-1
V3291	12	68490038	68521550	-1.05321	31513	72903	72905	BICF2P715523	BICF2P273290	3	-1
V3295	12	68490038	68521550	-0.935295	31513	72903	72905	BICF2P715523	BICF2P273290	3	-1
V3297	12	68490038	68521550	-0.787585	31513	72903	72905	BICF2P715523	BICF2P273290	3	-1
V3298	12	68490038	68521550	-0.83467	31513	72903	72905	BICF2P715523	BICF2P273290	3	-1
V3261	12	72024259	72268125	-0.755655	243867	73192	73209	BICF2P64196	BICF2P402255	18	-1
V3269	12	72024259	72268125	-0.589371	243867	73192	73209	BICF2P64196	BICF2P402255	18	-1
V3270	12	72024259	72268125	-0.564679	243867	73192	73209	BICF2P64196	BICF2P402255	18	-1
V3273	12	72024259	72268125	-0.603209	243867	73192	73209	BICF2P64196	BICF2P402255	18	-1
V3292	12	72024259	72268125	-0.615248	243867	73192	73209	BICF2P64196	BICF2P402255	18	-1
V3295	12	72024259	72268125	-0.526357	243867	73192	73209	BICF2P64196	BICF2P402255	18	-1
V3298	12	72024259	72268125	-0.470475	243867	73192	73209	BICF2P64196	BICF2P402255	18	-1
V3252	12	72024259	72491619	-0.282548	467361	73192	73229	BICF2P64196	TIGRP2P174000_rs8757648	38	-1
V3275	12	72024259	72491619	-0.263615	467361	73192	73229	BICF2P64196	TIGRP2P174000_rs8757648	38	-1
V3278	12	72024259	72491619	-0.280003	467361	73192	73229	BICF2P64196	TIGRP2P174000_rs8757648	38	-1
V3280	12	72024259	72491619	-0.221785	467361	73192	73229	BICF2P64196	TIGRP2P174000_rs8757648	38	-1
V3293	12	72024259	72491619	-0.293217	467361	73192	73229	BICF2P64196	TIGRP2P174000_rs8757648	38	-1
V3254	12	72045149	72268125	-0.590374	222977	73193	73209	TIGRP2P173862_rs8727941	BICF2P402255	17	-1
V3256	12	72045149	72268125	-0.481362	222977	73193	73209	TIGRP2P173862_rs8727941	BICF2P402255	17	-1
V3286	12	72045149	72268125	-0.412859	222977	73193	73209	TIGRP2P173862_rs8727941	BICF2P402255	17	-1
V3291	12	72045149	72268125	-0.454767	222977	73193	73209	TIGRP2P173862_rs8727941	BICF2P402255	17	-1
V3297	12	72045149	72268125	-0.41445	222977	73193	73209	TIGRP2P173862_rs8727941	BICF2P402255	17	-1
V3285	12	72106749	72145131	-0.934856	38383	73196	73198	BICF2P456789	BICF2S23349673	3	-1
V3289	13	7463786	7489990	-1.76229	26205	73822	73824	BICF2G630604724	BICF2G630604727	3	-1
V3297	13	11172517	11374587	-5.15813	202071	74111	74130	BICF2G630606982	BICF2G630607287	20	-1
V3295	13	35890336	36011431	-0.99166	121096	76156	76168	BICF2P482732	BICF2P1456803	13	-1
V3252	13	35964211	36011431	-1.13508	47221	76162	76168	BICF2G630660140	BICF2P1456803	7	-1
V3261	13	35964211	36011431	-1.52381	47221	76162	76168	BICF2G630660140	BICF2P1456803	7	-1
V3267	13	35964211	36011431	-1.41518	47221	76162	76168	BICF2G630660140	BICF2P1456803	7	-1
V3267	13	38350846	38365050	-5.49702	14205	76317	76319	TIGRP2P176690_rs8673809	BICF2P258310	3	-1
V3275	13	38350846	38365050	-3.85575	14205	76317	76319	TIGRP2P176690_rs8673809	BICF2P258310	3	-1
V3254	13	38460273	38492286	-3.64676	32014	76326	76328	BICF2P111966	BICF2P1344904	3	-1
V3286	13	38583430	38589999	-2.58246	6570	76335	76337	BICF2P446760	BICF2P452680	3	-1
V3287	13	38583430	38589999	-2.48524	6570	76335	76337	BICF2P446760	BICF2P452680	3	-1
V3279	13	38677590	38700365	-3.32872	22776	76345	76347	BICF2P700794	BICF2P425376	3	-1
V3285	13	39553208	39597753	-1.67586	44546	76409	76413	BICF2P527054	BICF2P43418	5	-1
V3252	13	49038696	49075233	-1.89844	36538	77150	77152	TIGRP2P179907_rs9239717	TIGRP2P179961_rs8675528	3	-1
V3256	13	49038696	49075233	-2.06111	36538	77150	77152	TIGRP2P179907_rs9239717	TIGRP2P179961_rs8675528	3	-1
V3268	13	49038696	49075233	-1.94703	36538	77150	77152	TIGRP2P179907_rs9239717	TIGRP2P179961_rs8675528	3	-1
V3269	13	49038696	49075233	-1.93815	36538	77150	77152	TIGRP2P179907_rs9239717	TIGRP2P179961_rs8675528	3	-1
V3276	13	49038696	49075233	-1.91394	36538	77150	77152	TIGRP2P179907_rs9239717	TIGRP2P179961_rs8675528	3	-1
V3280	13	49038696	49075233	-2.00044	36538	77150	77152	TIGRP2P179907_rs9239717	TIGRP2P179961_rs8675528	3	-1
V3287	13	49038696	49075233	-1.9013	36538	77150	77152	TIGRP2P179907_rs9239717	TIGRP2P179961_rs8675528	3	-1
V3289	13	49038696	49075233	-1.90878	36538	77150	77152	TIGRP2P179907_rs9239717	TIGRP2P179961_rs8675528	3	-1
V3291	13	49038696	49075233	-1.92285	36538	77150	77152	TIGRP2P179907_rs9239717	TIGRP2P179961_rs8675528	3	-1
V3295	13	49038696	49075233	-1.796	36538	77150	77152	TIGRP2P179907_rs9239717	TIGRP2P179961_rs8675528	3	-1
V3261	13	50442609	50462760	-4.39027	20152	77249	77251	BICF2P872055	BICF2P116436	3	-1
V3267	13	50442609	50462760	-2.7463	20152	77249	77251	BICF2P872055	BICF2P116436	3	-1
V3270	13	50442609	50462760	-3.92486	20152	77249	77251	BICF2P872055	BICF2P116436	3	-1
V3275	13	50442609	50462760	-3.8545	20152	77249	77251	BICF2P872055	BICF2P116436	3	-1
V3278	13	50442609	50462760	-3.79082	20152	77249	77251	BICF2P872055	BICF2P116436	3	-1
V3279	13	50442609	50462760	-3.65533	20152	77249	77251	BICF2P872055	BICF2P116436	3	-1
V3280	13	50442609	50462760	-3.81189	20152	77249	77251	BICF2P872055	BICF2P116436	3	-1
V3292	13	50442609	50462760	-1.85043	20152	77249	77251	BICF2P872055	BICF2P116436	3	-1
V3293	13	50442609	50462760	-3.65234	20152	77249	77251	BICF2P872055	BICF2P116436	3	-1
V3298	13	50442609	50462760	-1.70903	20152	77249	77251	BICF2P872055	BICF2P116436	3	-1
V3271	13	51355920	51375278	-4.79475	19359	77311	77313	BICF2S23437260	TIGRP2P180600_rs8685663	3	-1
V3252	14	46484	1000647	-0.268709	954164	78248	78294	BICF2G630707245	BICF2P427413	47	-1
V3254	14	46484	1000647	-0.37348	954164	78248	78294	BICF2G630707245	BICF2P427413	47	-1
V3256	14	46484	1000647	-0.295749	954164	78248	78294	BICF2G630707245	BICF2P427413	47	-1
V3267	14	46484	1000647	-0.415778	954164	78248	78294	BICF2G630707245	BICF2P427413	47	-1
V3268	14	46484	1000647	-0.351348	954164	78248	78294	BICF2G630707245	BICF2P427413	47	-1
V3269	14	46484	1000647	-0.411046	954164	78248	78294	BICF2G630707245	BICF2P427413	47	-1
V3270	14	46484	1000647	-0.362011	954164	78248	78294	BICF2G630707245	BICF2P427413	47	-1
V3271	14	46484	1000647	-0.368859	954164	78248	78294	BICF2G630707245	BICF2P427413	47	-1
V3275	14	46484	1000647	-0.394387	954164	78248	78294	BICF2G630707245	BICF2P427413	47	-1
V3278	14	46484	1000647	-0.383298	954164	78248	78294	BICF2G630707245	BICF2P427413	47	-1
V3279	14	46484	1000647	-0.366372	954164	78248	78294	BICF2G630707245	BICF2P427413	47	-1
V3286	14	46484	1000647	-0.165467	954164	78248	78294	BICF2G630707245	BICF2P427413	47	-1
V3289	14	46484	1000647	-0.229847	954164	78248	78294	BICF2G630707245	BICF2P427413	47	-1
V3293	14	46484	1000647	-0.375211	954164	78248	78294	BICF2G630707245	BICF2P427413	47	-1
V3295	14	46484	1000647	-0.314499	954164	78248	78294	BICF2G630707245	BICF2P427413	47	-1
V3296	14	46484	1000647	-0.307733	954164	78248	78294	BICF2G630707245	BICF2P427413	47	-1
V3297	14	46484	1000647	-0.294101	954164	78248	78294	BICF2G630707245	BICF2P427413	47	-1
V3252	14	5073831	5079225	-1.74686	5395	78549	78551	BICF2G630519371	BICF2S2325960	3	-1
V3267	14	5073831	5079225	-1.80452	5395	78549	78551	BICF2G630519371	BICF2S2325960	3	-1
V3271	14	5073831	5079225	-1.74648	5395	78549	78551	BICF2G630519371	BICF2S2325960	3	-1
V3278	14	5073831	5079225	-1.9048	5395	78549	78551	BICF2G630519371	BICF2S2325960	3	-1
V3289	14	5073831	5079225	-1.67634	5395	78549	78551	BICF2G630519371	BICF2S2325960	3	-1
V3293	14	5073831	5079225	-1.73307	5395	78549	78551	BICF2G630519371	BICF2S2325960	3	-1
V3295	14	5073831	5079225	-1.67889	5395	78549	78551	BICF2G630519371	BICF2S2325960	3	-1
V3296	14	5073831	5079225	-1.72599	5395	78549	78551	BICF2G630519371	BICF2S2325960	3	-1
V3297	14	5073831	5079225	-1.59084	5395	78549	78551	BICF2G630519371	BICF2S2325960	3	-1
V3267	14	9965529	10027715	-0.67672	62187	78872	78877	BICF2G630520556	BICF2P293316	6	-1
V3271	14	9965529	10027715	-0.621228	62187	78872	78877	BICF2G630520556	BICF2P293316	6	-1
V3296	14	10577505	10603333	-0.745447	25829	78925	78927	BICF2P332254	BICF2P419366	3	-1
V3286	14	11169811	11195920	-0.807888	26110	78972	78974	BICF2P1198043	BICF2P1339843	3	-1
V3296	14	11169811	11195920	-0.919013	26110	78972	78974	BICF2P1198043	BICF2P1339843	3	-1
V3297	14	11179710	11227097	-2.81349	47388	78973	78975	BICF2P870424	BICF2S239621	3	-1
V3252	14	17125762	17158021	-1.46841	32260	79425	79427	BICF2P1499	TIGRP2P187972_rs8912741	3	-1
V3268	14	18365438	18385658	-2.00515	20221	79525	79527	BICF2P300135	BICF2P26857	3	-1
V3256	14	18381240	18400140	-2.36981	18901	79526	79528	BICF2P400806	BICF2P843055	3	-1
V3256	14	25663596	25691438	-1.8589	27843	80064	80066	TIGRP2P189690_rs8870152	BICF2P1150007	3	-1
V3289	14	29680518	29703558	-2.06444	23041	80378	80380	BICF2G630525693	BICF2G630525721	3	-1
V3254	14	29692877	29714085	-2.17355	21209	80379	80381	BICF2S23344680	BICF2P756924	3	-1
V3261	14	29692877	29714085	-2.44195	21209	80379	80381	BICF2S23344680	BICF2P756924	3	-1
V3296	14	30205557	30233063	-1.5287	27507	80419	80421	BICF2P290676	BICF2P1357778	3	-1
V3270	14	30411516	30440368	-3.4726	28853	80435	80437	BICF2S23051020	BICF2S22959169	3	-1
V3268	14	31106510	31151315	-1.83068	44806	80489	80491	BICF2P410268	TIGRP2P191136_rs9084518	3	-1
V3293	14	31164458	31204377	-2.30226	39920	80493	80495	BICF2P1258134	TIGRP2P191147_rs8682564	3	-1
V3295	14	31262089	31283327	-3.25818	21239	80500	80502	TIGRP2P191152_rs8532067	BICF2G630525917	3	-1
V3269	14	31704054	31721522	-2.14897	17469	80531	80533	BICF2G630526140	BICF2G630526149	3	-1
V3256	14	32709261	32722871	-2.87979	13611	80607	80609	BICF2G630526449	BICF2G630526461	3	-1
V3279	14	32722871	32757403	-0.816988	34533	80609	80612	BICF2G630526461	BICF2G630526517	4	-1
V3278	14	32850489	32874432	-2.22742	23944	80619	80621	BICF2G630526621	BICF2G630526637	3	-1
V3252	14	33058221	33083091	-1.95806	24871	80635	80637	BICF2G630526771	BICF2G630526797	3	-1
V3285	14	33111946	33151471	-1.17718	39526	80639	80642	BICF2G630526832	BICF2G630526872	4	-1
V3286	14	33133200	33151471	-2.17023	18272	80640	80642	BICF2G630526852	BICF2G630526872	3	-1
V3291	14	33491800	33528758	-2.35359	36959	80673	80675	BICF2G630527309	BICF2P1166163	3	-1
V3275	14	33622854	33678581	-3.74145	55728	80680	80682	BICF2G630527344	TIGRP2P191398_rs8775804	3	-1
V3297	14	37703938	37731477	-2.81671	27540	80987	80989	BICF2S22928479	BICF2G630528103	3	-1
V3276	14	42149087	42173208	-1.72521	24122	81357	81359	BICF2G630530770	BICF2G630530812	3	-1
V3297	14	42149087	42173208	-1.73561	24122	81357	81359	BICF2G630530770	BICF2G630530812	3	-1
V3269	14	42165303	42191677	-1.80245	26375	81358	81360	BICF2S22948731	BICF2G630530825	3	-1
V3286	14	42165303	42191677	-2.07067	26375	81358	81360	BICF2S22948731	BICF2G630530825	3	-1
V3287	14	42165303	42191677	-1.70486	26375	81358	81360	BICF2S22948731	BICF2G630530825	3	-1
V3261	14	44425756	44456963	-2.6305	31208	81548	81550	BICF2P752010	BICF2S2301671	3	-1
V3286	14	45027612	45043715	-0.782456	16104	81596	81598	BICF2P551176	BICF2P418477	3	-1
V3270	14	47262900	47310960	-1.86172	48061	81768	81770	BICF2S2338345	BICF2P1179839	3	-1
V3280	15	1726798	1762076	-2.72001	35279	82874	82876	BICF2P1356705	BICF2S23317553	3	-1
V3286	15	2381608	2456134	-2.99976	74527	82907	82909	BICF2P101960	G856f27S128	3	-1
V3254	15	3063558	3089623	-3.34355	26066	82946	82948	BICF2P407087	TIGRP2P204122_rs8795329	3	-1
V3269	15	3700261	3724325	-2.71678	24065	82984	82986	BICF2P748886	BICF2P678621	3	-1
V3256	15	7748180	7765410	-4.01295	17231	83250	83252	BICF2G630444462	BICF2G630444459	3	-1
V3267	15	7765410	7821203	-3.2309	55794	83252	83256	BICF2G630444459	BICF2G630444401	5	-1
V3280	15	7966269	7985600	-3.19978	19332	83268	83270	BICF2P283828	BICF2P1444481	3	-1
V3298	15	7966269	7985600	-4.96401	19332	83268	83270	BICF2P283828	BICF2P1444481	3	-1
V3252	15	7976558	7999544	-3.11595	22987	83269	83271	TIGRP2P195163_rs8889352	BICF2P1018807	3	-1
V3269	15	7976558	8779825	-0.480625	803268	83269	83329	TIGRP2P195163_rs8889352	BICF2S2343870	61	-1
V3293	15	8373335	8394903	-4.20556	21569	83298	83300	BICF2G630444299	BICF2G630444284	3	-1
V3295	15	8373335	8421416	-3.06281	48082	83298	83303	BICF2G630444299	BICF2P1297288	6	-1
V3268	15	8421416	8454410	-2.84114	32995	83303	83305	BICF2P1297288	BICF2P294651	3	-1
V3275	15	8719971	8735280	-3.5487	15310	83323	83325	BICF2P1286393	BICF2G630444083	3	-1
V3279	15	8779825	8804900	-4.28213	25076	83329	83331	BICF2S2343870	BICF2P1384998	3	-1
V3269	15	8801056	8822341	-4.30051	21286	83330	83333	BICF2P284408	BICF2S2306938	4	-1
V3278	15	9615484	9647700	-4.91339	32217	83396	83398	TIGRP2P195557_rs9047707	BICF2G630443632	3	-1
V3297	15	9968603	10006197	-2.93109	37595	83423	83425	BICF2G630443531	BICF2P877363	3	-1
V3254	15	52481838	52507473	-2.85214	25636	86620	86622	BICF2G630426332	BICF2G630426297	3	-1
V3297	15	52481838	52507473	-2.4109	25636	86620	86622	BICF2G630426332	BICF2G630426297	3	-1
V3254	16	279430	442252	-0.543782	162823	87590	87598	BICF2G630842851	BICF2S23452372	9	-1
V3291	16	279430	442252	-0.430514	162823	87590	87598	BICF2G630842851	BICF2S23452372	9	-1
V3252	16	287249	344366	-1.05248	57118	87591	87593	BICF2G630842883	G892f59S180	3	-1
V3285	16	287249	344366	-0.854964	57118	87591	87593	BICF2G630842883	G892f59S180	3	-1
V3252	16	383954	1301706	-0.161601	917753	87594	87646	BICF2S22915646	BICF2S23024057	53	-1
V3269	16	4344002	4380926	-1.00231	36925	87826	87828	BICF2P1162241	TIGRP2P210860_rs8496715	3	-1
V3273	16	4344002	4380926	-1.02301	36925	87826	87828	BICF2P1162241	TIGRP2P210860_rs8496715	3	-1
V3252	16	4344878	4415164	-0.842621	70287	87827	87829	BICF2S23135682	TIGRP2P210862_rs8694220	3	-1
V3261	16	4344878	4415164	-1.07419	70287	87827	87829	BICF2S23135682	TIGRP2P210862_rs8694220	3	-1
V3271	16	4344878	4415164	-1.06429	70287	87827	87829	BICF2S23135682	TIGRP2P210862_rs8694220	3	-1
V3276	16	4344878	4415164	-0.828569	70287	87827	87829	BICF2S23135682	TIGRP2P210862_rs8694220	3	-1
V3285	16	4344878	4415164	-0.891191	70287	87827	87829	BICF2S23135682	TIGRP2P210862_rs8694220	3	-1
V3252	16	6293558	6315319	-0.764449	21762	87940	87942	BICF2P165523	BICF2P64191	3	-1
V3285	16	6304316	6328427	-0.820279	24112	87941	87943	BICF2P1407562	BICF2S23117136	3	-1
V3291	16	6304316	6343558	-0.682717	39243	87941	87944	BICF2P1407562	BICF2P740178	4	-1
V3285	16	12353595	12380728	-0.750442	27134	88320	88322	BICF2P231949	BICF2P294786	3	-1
V3269	16	25623393	25639207	-1.98762	15815	89326	89328	BICF2P60110	BICF2S23248096	3	-1
V3273	16	25623393	25639207	-1.84359	15815	89326	89328	BICF2P60110	BICF2S23248096	3	-1
V3278	16	25623393	25639207	-2.08235	15815	89326	89328	BICF2P60110	BICF2S23248096	3	-1
V3285	16	25623393	25639207	-0.76493	15815	89326	89328	BICF2P60110	BICF2S23248096	3	-1
V3292	16	25623393	25639207	-2.07968	15815	89326	89328	BICF2P60110	BICF2S23248096	3	-1
V3298	16	25623393	25639207	-1.78486	15815	89326	89328	BICF2P60110	BICF2S23248096	3	-1
V3252	16	25639207	25648238	-0.705867	9032	89328	89330	BICF2S23248096	BICF2P812665	3	-1
V3291	16	25639207	25648238	-1.64851	9032	89328	89330	BICF2S23248096	BICF2P812665	3	-1
V3270	16	27809632	27837546	-1.19445	27915	89476	89478	BICF2S23339491	BICF2P1226569	3	-1
V3267	16	30479499	30502988	-1.78744	23490	89698	89700	BICF2G630112511	BICF2G630112540	3	-1
V3279	16	30479499	30502988	-1.82399	23490	89698	89700	BICF2G630112511	BICF2G630112540	3	-1
V3293	16	30479499	30502988	-1.66918	23490	89698	89700	BICF2G630112511	BICF2G630112540	3	-1
V3256	16	31112531	31136359	-0.75151	23829	89754	89756	BICF2G630113109	BICF2G630113141	3	-1
V3271	16	37458888	37497824	-1.26838	38937	90253	90255	BICF2S2336279	BICF2S22936263	3	-1
V3293	16	37458888	37497824	-1.28148	38937	90253	90255	BICF2S2336279	BICF2S22936263	3	-1
V3254	16	37497824	37511680	-1.19012	13857	90255	90257	BICF2S22936263	BICF2P423853	3	-1
V3276	16	37497824	37511680	-1.27245	13857	90255	90257	BICF2S22936263	BICF2P423853	3	-1
V3287	16	37497824	37511680	-1.13775	13857	90255	90257	BICF2S22936263	BICF2P423853	3	-1
V3291	16	37497824	37511680	-1.21531	13857	90255	90257	BICF2S22936263	BICF2P423853	3	-1
V3296	16	37497824	37511680	-1.23551	13857	90255	90257	BICF2S22936263	BICF2P423853	3	-1
V3297	16	37497824	37511680	-1.21581	13857	90255	90257	BICF2S22936263	BICF2P423853	3	-1
V3285	16	39921517	39963030	-0.720585	41514	90436	90438	BICF2P1178112	BICF2P304785	3	-1
V3252	16	39948817	39975759	-0.805436	26943	90437	90439	BICF2S22935760	BICF2G630812614	3	-1
V3252	16	47443696	47470243	-0.639596	26548	91051	91054	BICF2S23330123	BICF2G630815020	4	-1
V3296	16	54359274	54389039	-0.616283	29766	91574	91577	BICF2P1240333	BICF2G630820053	4	-1
V3297	16	54487479	54510360	-1.50367	22882	91590	91592	BICF2G630820268	TIGRP2P227658_rs8570968	3	-1
V3261	17	51048	739345	-0.263716	688298	91960	92010	BICF2P1369289	BICF2P87482	51	-1
V3268	17	51048	739345	-0.218983	688298	91960	92010	BICF2P1369289	BICF2P87482	51	-1
V3275	17	51048	739345	-0.235634	688298	91960	92010	BICF2P1369289	BICF2P87482	51	-1
V3280	17	51048	739345	-0.182839	688298	91960	92010	BICF2P1369289	BICF2P87482	51	-1
V3293	17	51048	739345	-0.237556	688298	91960	92010	BICF2P1369289	BICF2P87482	51	-1
V3254	17	51048	930518	-0.263621	879471	91960	92022	BICF2P1369289	TIGRP2P227802_rs9048806	63	-1
V3276	17	51048	930518	-0.204453	879471	91960	92022	BICF2P1369289	TIGRP2P227802_rs9048806	63	-1
V3285	17	51048	930518	-0.172253	879471	91960	92022	BICF2P1369289	TIGRP2P227802_rs9048806	63	-1
V3289	17	51048	930518	-0.186191	879471	91960	92022	BICF2P1369289	TIGRP2P227802_rs9048806	63	-1
V3291	17	51048	930518	-0.209779	879471	91960	92022	BICF2P1369289	TIGRP2P227802_rs9048806	63	-1
V3296	17	51048	930518	-0.29868	879471	91960	92022	BICF2P1369289	TIGRP2P227802_rs9048806	63	-1
V3261	17	749155	818590	-1.31913	69436	92011	92015	BICF2S2362493	BICF2S23136090	5	-1
V3268	17	749155	818590	-1.15904	69436	92011	92015	BICF2S2362493	BICF2S23136090	5	-1
V3275	17	749155	818590	-1.27362	69436	92011	92015	BICF2S2362493	BICF2S23136090	5	-1
V3280	17	749155	818590	-0.982054	69436	92011	92015	BICF2S2362493	BICF2S23136090	5	-1
V3293	17	749155	818590	-1.12645	69436	92011	92015	BICF2S2362493	BICF2S23136090	5	-1
V3254	17	9634130	9663198	-2.79551	29069	92731	92733	BICF2G630221126	BICF2S22926878	3	-1
V3269	17	9634130	9663198	-2.34765	29069	92731	92733	BICF2G630221126	BICF2S22926878	3	-1
V3276	17	9634130	9663198	-2.46119	29069	92731	92733	BICF2G630221126	BICF2S22926878	3	-1
V3287	17	9634130	9663198	-2.08658	29069	92731	92733	BICF2G630221126	BICF2S22926878	3	-1
V3289	17	9634130	9663198	-2.4228	29069	92731	92733	BICF2G630221126	BICF2S22926878	3	-1
V3291	17	9634130	9663198	-2.5206	29069	92731	92733	BICF2G630221126	BICF2S22926878	3	-1
V3292	17	9634130	9663198	-2.31996	29069	92731	92733	BICF2G630221126	BICF2S22926878	3	-1
V3293	17	9634130	9663198	-2.28885	29069	92731	92733	BICF2G630221126	BICF2S22926878	3	-1
V3297	17	9634130	9663198	-2.61558	29069	92731	92733	BICF2G630221126	BICF2S22926878	3	-1
V3287	17	18733473	19085869	-0.242074	352397	93460	93483	BICF2P1425170	BICF2S22959912	24	-1
V3293	17	21079884	21089200	-0.71736	9317	93629	93631	BICF2P1081073	BICF2P828244	3	-1
V3269	17	21821055	21860819	-1.87936	39765	93659	93661	BICF2P1307982	TIGRP2P228725_rs8527793	3	-1
V3292	17	21821055	21860819	-2.16255	39765	93659	93661	BICF2P1307982	TIGRP2P228725_rs8527793	3	-1
V3289	17	21860819	21887297	-1.91614	26479	93661	93663	TIGRP2P228725_rs8527793	BICF2P585519	3	-1
V3291	17	21860819	21887297	-1.91373	26479	93661	93663	TIGRP2P228725_rs8527793	BICF2P585519	3	-1
V3286	17	24179297	24207420	-0.758155	28124	93860	93862	BICF2G630215430	BICF2P914190	3	-1
V3287	17	24179297	24207420	-0.715339	28124	93860	93862	BICF2G630215430	BICF2P914190	3	-1
V3293	17	24179297	24207420	-0.773315	28124	93860	93862	BICF2G630215430	BICF2P914190	3	-1
V3256	17	31697853	31748212	-2.27112	50360	94434	94438	BICF2G630211349	BICF2G630211301	5	-1
V3268	17	31697853	31748212	-1.93919	50360	94434	94438	BICF2G630211349	BICF2G630211301	5	-1
V3271	17	31697853	31748212	-2.05737	50360	94434	94438	BICF2G630211349	BICF2G630211301	5	-1
V3275	17	31697853	31748212	-1.98307	50360	94434	94438	BICF2G630211349	BICF2G630211301	5	-1
V3289	17	31727071	31748212	-2.13759	21142	94436	94438	BICF2S23025755	BICF2G630211301	3	-1
V3298	17	35452402	35494998	-1.89006	42597	94746	94748	BICF2G630208545	BICF2S23418330	3	-1
V3254	17	37575158	37612731	-2.94667	37574	94916	94918	BICF2S23516414	BICF2P440338	3	-1
V3267	17	37575158	37612731	-3.02675	37574	94916	94918	BICF2S23516414	BICF2P440338	3	-1
V3273	17	37575158	37612731	-2.80853	37574	94916	94918	BICF2S23516414	BICF2P440338	3	-1
V3278	17	37575158	37612731	-3.54182	37574	94916	94918	BICF2S23516414	BICF2P440338	3	-1
V3289	17	39880141	39905486	-0.820636	25346	95097	95099	BICF2S23210041	TIGRP2P231415_rs8979551	3	-1
V3293	17	39880141	39905486	-0.947241	25346	95097	95099	BICF2S23210041	TIGRP2P231415_rs8979551	3	-1
V3295	17	39880141	39905486	-1.22888	25346	95097	95099	BICF2S23210041	TIGRP2P231415_rs8979551	3	-1
V3296	17	39962193	39998079	-2.56107	35887	95104	95106	BICF2P1396301	BICF2P1000010	3	-1
V3261	17	44988352	45019248	-1.69169	30897	95503	95505	BICF2G630205561	BICF2G630205527	3	-1
V3268	17	44988352	45019248	-1.82887	30897	95503	95505	BICF2G630205561	BICF2G630205527	3	-1
V3275	17	44988352	45019248	-1.64345	30897	95503	95505	BICF2G630205561	BICF2G630205527	3	-1
V3276	17	44988352	45019248	-1.64751	30897	95503	95505	BICF2G630205561	BICF2G630205527	3	-1
V3252	17	48545155	48573392	-1.82555	28238	95798	95800	BICF2P122557	BICF2P888516	3	-1
V3269	17	48545155	48573392	-1.71131	28238	95798	95800	BICF2P122557	BICF2P888516	3	-1
V3279	17	48545155	48573392	-1.57781	28238	95798	95800	BICF2P122557	BICF2P888516	3	-1
V3285	17	48545155	48573392	-1.6894	28238	95798	95800	BICF2P122557	BICF2P888516	3	-1
V3291	17	48545155	48573392	-1.59307	28238	95798	95800	BICF2P122557	BICF2P888516	3	-1
V3292	17	48545155	48573392	-1.7332	28238	95798	95800	BICF2P122557	BICF2P888516	3	-1
V3297	17	48545155	48573392	-1.68879	28238	95798	95800	BICF2P122557	BICF2P888516	3	-1
V3298	17	48545155	48573392	-1.66496	28238	95798	95800	BICF2P122557	BICF2P888516	3	-1
V3287	17	50069376	50094339	-1.36347	24964	95941	95943	BICF2P1397770	TIGRP2P234203_rs8881746	3	-1
V3286	17	50400523	50427187	-1.47649	26665	95968	95970	BICF2P421228	BICF2P952663	3	-1
V3287	17	57869636	57963444	-1.59917	93809	96539	96541	BICF2S22917929	G973f9S154	3	-1
V3293	17	63233727	63255210	-0.778798	21484	96891	96893	BICF2P237162	BICF2P773145	3	-1
V3276	18	13680917	13701240	-1.81117	20324	97925	97927	BICF2P1118107	BICF2P892066	3	-1
V3279	18	13680917	13701240	-1.63968	20324	97925	97927	BICF2P1118107	BICF2P892066	3	-1
V3297	18	13680917	13701240	-1.52719	20324	97925	97927	BICF2P1118107	BICF2P892066	3	-1
V3271	18	25353932	25835512	-0.44482	481581	98771	98809	BICF2P1034359	TIGRP2P246809_rs8956242	39	-1
V3275	18	25353932	25835512	-0.370789	481581	98771	98809	BICF2P1034359	TIGRP2P246809_rs8956242	39	-1
V3293	18	25353932	25835512	-0.445617	481581	98771	98809	BICF2P1034359	TIGRP2P246809_rs8956242	39	-1
V3280	18	25353932	25853721	-0.351024	499790	98771	98811	BICF2P1034359	BICF2S22950346	41	-1
V3273	18	25507745	25835512	-0.482548	327768	98784	98809	BICF2S23317158	TIGRP2P246809_rs8956242	26	-1
V3278	18	25507745	25835512	-0.424616	327768	98784	98809	BICF2S23317158	TIGRP2P246809_rs8956242	26	-1
V3279	18	25507745	25835512	-0.402945	327768	98784	98809	BICF2S23317158	TIGRP2P246809_rs8956242	26	-1
V3254	18	25522113	25740090	-0.535176	217978	98785	98803	BICF2P117709	BICF2P14496	19	-1
V3291	18	25522113	25835512	-0.41384	313400	98785	98809	BICF2P117709	TIGRP2P246809_rs8956242	25	-1
V3295	18	25551868	25835512	-0.518853	283645	98787	98809	BICF2P1296917	TIGRP2P246809_rs8956242	23	-1
V3297	18	25551868	25835512	-0.412231	283645	98787	98809	BICF2P1296917	TIGRP2P246809_rs8956242	23	-1
V3268	18	25644344	25835512	-0.498791	191169	98793	98809	BICF2P1358625	TIGRP2P246809_rs8956242	17	-1
V3270	18	25644344	25835512	-0.537208	191169	98793	98809	BICF2P1358625	TIGRP2P246809_rs8956242	17	-1
V3276	18	28466580	28483370	-2.41421	16791	99020	99022	BICF2P435180	BICF2S22948596	3	-1
V3279	18	28466580	28483370	-2.20942	16791	99020	99022	BICF2P435180	BICF2S22948596	3	-1
V3293	18	28466580	28483370	-2.05892	16791	99020	99022	BICF2P435180	BICF2S22948596	3	-1
V3275	18	39422566	39441997	-1.61575	19432	99944	99946	BICF2G630695284	BICF2G630695265	3	-1
V3286	18	39422566	39441997	-1.724	19432	99944	99946	BICF2G630695284	BICF2G630695265	3	-1
V3270	18	39436320	39453972	-1.74012	17653	99945	99947	BICF2G630695268	BICF2G630695257	3	-1
V3291	18	43504493	43518639	-0.961267	14147	100204	100206	TIGRP2P253444_rs8859144	TIGRP2P253465_rs9223337	3	-1
V3254	18	44960166	44982705	-1.09024	22540	100335	100337	BICF2G630691338	BICF2P844269	3	-1
V3256	18	44960166	44982705	-1.17692	22540	100335	100337	BICF2G630691338	BICF2P844269	3	-1
V3268	18	44960166	44982705	-1.0587	22540	100335	100337	BICF2G630691338	BICF2P844269	3	-1
V3273	18	44960166	44982705	-1.05697	22540	100335	100337	BICF2G630691338	BICF2P844269	3	-1
V3276	18	44960166	44982705	-1.07718	22540	100335	100337	BICF2G630691338	BICF2P844269	3	-1
V3280	18	44960166	44982705	-0.980985	22540	100335	100337	BICF2G630691338	BICF2P844269	3	-1
V3289	18	44960166	44982705	-1.08521	22540	100335	100337	BICF2G630691338	BICF2P844269	3	-1
V3271	18	47590009	47622091	-1.75347	32083	100573	100575	BICF2P1217691	BICF2P863660	3	-1
V3285	18	47622091	47637994	-1.79271	15904	100575	100577	BICF2P863660	BICF2P822092	3	-1
V3296	18	47622091	47637994	-1.79193	15904	100575	100577	BICF2P863660	BICF2P822092	3	-1
V3269	19	1339011	1371826	-1.21596	32816	101328	101330	BICF2S23231218	BICF2P1141329	3	-1
V3295	19	1339011	1371826	-1.15045	32816	101328	101330	BICF2S23231218	BICF2P1141329	3	-1
V3254	19	7153233	7167632	-1.72574	14400	101733	101735	BICF2S23433453	BICF2P986229	3	-1
V3271	19	7160676	7187666	-1.89663	26991	101734	101736	BICF2P774674	BICF2P588787	3	-1
V3293	19	7160676	7187666	-1.94991	26991	101734	101736	BICF2P774674	BICF2P588787	3	-1
V3291	19	10904146	10927717	-1.70977	23572	101994	101996	BICF2S23433457	BICF2P874164	3	-1
V3268	19	10927717	10953217	-1.82533	25501	101996	101998	BICF2P874164	BICF2G63036912	3	-1
V3270	19	10927717	10953217	-1.88036	25501	101996	101998	BICF2P874164	BICF2G63036912	3	-1
V3280	19	10927717	10953217	-1.6878	25501	101996	101998	BICF2P874164	BICF2G63036912	3	-1
V3269	19	13362597	13389686	-1.35154	27090	102160	102162	BICF2P751884	BICF2G63037793	3	-1
V3279	19	13362597	13389686	-1.2408	27090	102160	102162	BICF2P751884	BICF2G63037793	3	-1
V3292	19	13362597	13389686	-1.20489	27090	102160	102162	BICF2P751884	BICF2G63037793	3	-1
V3270	19	20027329	20052361	-1.45266	25033	102664	102666	TIGRP2P261565_rs8625027	TIGRP2P261690_rs8564506	3	-1
V3271	19	20027329	20052361	-1.27127	25033	102664	102666	TIGRP2P261565_rs8625027	TIGRP2P261690_rs8564506	3	-1
V3273	19	20027329	20052361	-1.2896	25033	102664	102666	TIGRP2P261565_rs8625027	TIGRP2P261690_rs8564506	3	-1
V3293	19	20027329	20052361	-1.18858	25033	102664	102666	TIGRP2P261565_rs8625027	TIGRP2P261690_rs8564506	3	-1
V3296	19	40333163	40369685	-1.40628	36523	104307	104309	BICF2P1146245	BICF2P1317909	3	-1
V3269	19	47604514	47632410	-0.711656	27897	104905	104907	BICF2G630255758	BICF2G630255743	3	-1
V3291	20	6113196	6117452	-0.932322	4257	105806	105808	BICF2P1380449	BICF2S23645283	3	-1
V3296	20	6114056	6131524	-1.38257	17469	105807	105809	BICF2P1380446	BICF2P944676	3	-1
V3289	20	15692447	15740325	-1.8715	47879	106533	106535	BICF2P1293617	BICF2P694703	3	-1
V3273	20	42179452	42196795	-1.51498	17344	108553	108555	BICF2P875778	BICF2P927993	3	-1
V3295	20	42179452	42196795	-1.4571	17344	108553	108555	BICF2P875778	BICF2P927993	3	-1
V3269	20	42187894	42215840	-1.56118	27947	108554	108556	BICF2P1266190	BICF2P1211484	3	-1
V3297	20	43570139	43574625	-2.03182	4487	108666	108668	BICF2P543637	BICF2P410834	3	-1
V3256	20	47607922	47689970	-1.07309	82049	108959	108963	BICF2P300997	BICF2S23625284	5	-1
V3268	20	47644167	47689970	-1.27489	45804	108961	108963	BICF2P314298	BICF2S23625284	3	-1
V3275	20	47644167	47689970	-1.26806	45804	108961	108963	BICF2P314298	BICF2S23625284	3	-1
V3291	20	47689970	47733933	-1.23106	43964	108963	108965	BICF2S23625284	BICF2P562649	3	-1
V3254	20	53264834	53285579	-4.68142	20746	109379	109381	BICF2G630446911	BICF2G630446823	3	-1
V3267	20	53264834	53285579	-4.3914	20746	109379	109381	BICF2G630446911	BICF2G630446823	3	-1
V3271	20	53264834	53285579	-4.37518	20746	109379	109381	BICF2G630446911	BICF2G630446823	3	-1
V3276	20	53264834	53285579	-4.33892	20746	109379	109381	BICF2G630446911	BICF2G630446823	3	-1
V3287	20	53264834	53285579	-4.26087	20746	109379	109381	BICF2G630446911	BICF2G630446823	3	-1
V3292	20	53264834	53285579	-4.0543	20746	109379	109381	BICF2G630446911	BICF2G630446823	3	-1
V3293	20	53264834	53285579	-4.62799	20746	109379	109381	BICF2G630446911	BICF2G630446823	3	-1
V3297	20	53264834	53285579	-4.48845	20746	109379	109381	BICF2G630446911	BICF2G630446823	3	-1
V3252	20	53277896	53336682	-4.75591	58787	109380	109382	BICF2G630446837	BICF2G630446820	3	-1
V3256	20	53277896	53336682	-4.5266	58787	109380	109382	BICF2G630446837	BICF2G630446820	3	-1
V3280	20	53277896	53336682	-4.86295	58787	109380	109382	BICF2G630446837	BICF2G630446820	3	-1
V3289	20	53277896	53336682	-4.40567	58787	109380	109382	BICF2G630446837	BICF2G630446820	3	-1
V3287	21	925434	992193	-1.83908	66760	109813	109815	BICF2S22918145	G1133f50S226	3	-1
V3293	21	925434	992193	-2.10098	66760	109813	109815	BICF2S22918145	G1133f50S226	3	-1
V3269	21	2363572	2407508	-0.695586	43937	109887	109889	BICF2S23330272	BICF2P101663	3	-1
V3298	21	2363572	2407508	-0.665179	43937	109887	109889	BICF2S23330272	BICF2P101663	3	-1
V3254	21	3729193	3748617	-0.73713	19425	109966	109968	BICF2G630659387	BICF2P163886	3	-1
V3287	21	3729193	3748617	-2.81766	19425	109966	109968	BICF2G630659387	BICF2P163886	3	-1
V3293	21	3729193	3748617	-2.81512	19425	109966	109968	BICF2G630659387	BICF2P163886	3	-1
V3271	21	7082746	7101509	-2.27512	18764	110224	110226	BICF2G630658283	BICF2G630658274	3	-1
V3287	21	12219981	12248833	-1.95128	28853	110630	110632	BICF2G630654712	BICF2P1045548	3	-1
V3254	21	17089078	17118327	-1.15173	29250	111008	111010	BICF2G630652299	BICF2S2339062	3	-1
V3267	21	17089078	17118327	-1.44865	29250	111008	111010	BICF2G630652299	BICF2S2339062	3	-1
V3270	21	17089078	17118327	-2.91144	29250	111008	111010	BICF2G630652299	BICF2S2339062	3	-1
V3271	21	17089078	17118327	-3.02912	29250	111008	111010	BICF2G630652299	BICF2S2339062	3	-1
V3276	21	17089078	17118327	-1.01653	29250	111008	111010	BICF2G630652299	BICF2S2339062	3	-1
V3287	21	17089078	17118327	-0.880233	29250	111008	111010	BICF2G630652299	BICF2S2339062	3	-1
V3296	21	17089078	17118327	-1.12861	29250	111008	111010	BICF2G630652299	BICF2S2339062	3	-1
V3298	21	17089078	17118327	-1.02302	29250	111008	111010	BICF2G630652299	BICF2S2339062	3	-1
V3269	21	17118327	17149422	-0.833697	31096	111010	111013	BICF2S2339062	BICF2G630652216	4	-1
V3275	21	17118327	17149422	-0.868848	31096	111010	111013	BICF2S2339062	BICF2G630652216	4	-1
V3256	21	17949933	17994352	-1.24641	44420	111085	111087	BICF2G630651468	BICF2G630651457	3	-1
V3297	21	17949933	17994352	-1.21918	44420	111085	111087	BICF2G630651468	BICF2G630651457	3	-1
V3296	21	21654842	21691014	-0.681121	36173	111387	111389	BICF2P323179	BICF2P50377	3	-1
V3252	21	25440944	25460490	-1.55007	19547	111670	111672	BICF2G630649235	BICF2G630649223	3	-1
V3254	21	25453148	25485652	-1.63585	32505	111671	111673	BICF2G630649224	BICF2P239339	3	-1
V3268	21	25453148	25485652	-1.47438	32505	111671	111673	BICF2G630649224	BICF2P239339	3	-1
V3296	21	25453148	25485652	-0.711215	32505	111671	111673	BICF2G630649224	BICF2P239339	3	-1
V3278	21	27091077	27111964	-1.84561	20888	111796	111798	BICF2G630648170	BICF2G630648158	3	-1
V3269	21	27100586	27121249	-3.22926	20664	111797	111799	BICF2G630648161	TIGRP2P281826_rs8561612	3	-1
V3271	21	27100586	27121249	-2.29839	20664	111797	111799	BICF2G630648161	TIGRP2P281826_rs8561612	3	-1
V3273	21	27100586	27121249	-2.19251	20664	111797	111799	BICF2G630648161	TIGRP2P281826_rs8561612	3	-1
V3279	21	27100586	27121249	-2.3199	20664	111797	111799	BICF2G630648161	TIGRP2P281826_rs8561612	3	-1
V3280	21	27100586	27121249	-2.48692	20664	111797	111799	BICF2G630648161	TIGRP2P281826_rs8561612	3	-1
V3285	21	27100586	27121249	-2.26756	20664	111797	111799	BICF2G630648161	TIGRP2P281826_rs8561612	3	-1
V3286	21	27100586	27121249	-2.24102	20664	111797	111799	BICF2G630648161	TIGRP2P281826_rs8561612	3	-1
V3289	21	27100586	27121249	-2.34101	20664	111797	111799	BICF2G630648161	TIGRP2P281826_rs8561612	3	-1
V3293	21	27100586	27121249	-1.95957	20664	111797	111799	BICF2G630648161	TIGRP2P281826_rs8561612	3	-1
V3295	21	27100586	27121249	-2.12516	20664	111797	111799	BICF2G630648161	TIGRP2P281826_rs8561612	3	-1
V3298	21	27100586	27121249	-2.15182	20664	111797	111799	BICF2G630648161	TIGRP2P281826_rs8561612	3	-1
V3268	21	28001896	28025325	-2.58704	23430	111862	111864	BICF2G630645407	BICF2G630645172	3	-1
V3276	21	28001896	28025325	-2.63447	23430	111862	111864	BICF2G630645407	BICF2G630645172	3	-1
V3292	21	28001896	28025325	-2.64686	23430	111862	111864	BICF2G630645407	BICF2G630645172	3	-1
V3254	21	29424024	29458806	-0.923145	34783	111964	111966	BICF2G630643453	TIGRP2P283293_rs8848248	3	-1
V3256	21	31308259	31315887	-1.32766	7629	112104	112106	BICF2P939006	BICF2S23419828	3	-1
V3256	21	35464142	35491568	-0.906604	27427	112436	112438	BICF2P1377107	BICF2S23446204	3	-1
V3269	21	35464142	35491568	-1.77791	27427	112436	112438	BICF2P1377107	BICF2S23446204	3	-1
V3296	21	35464142	35491568	-0.699029	27427	112436	112438	BICF2P1377107	BICF2S23446204	3	-1
V3298	21	35464142	35491568	-0.734827	27427	112436	112438	BICF2P1377107	BICF2S23446204	3	-1
V3270	21	37103017	37132736	-0.803052	29720	112548	112550	BICF2S2451850	BICF2P866988	3	-1
V3287	21	37103017	37652669	-0.150049	549653	112548	112592	BICF2S2451850	BICF2S23151384	45	-1
V3254	21	44776244	44811506	-1.99738	35263	113164	113166	TIGRP2P287452_rs8734688	BICF2P469034	3	-1
V3256	21	44776244	44811506	-1.77179	35263	113164	113166	TIGRP2P287452_rs8734688	BICF2P469034	3	-1
V3269	21	44776244	44811506	-1.92765	35263	113164	113166	TIGRP2P287452_rs8734688	BICF2P469034	3	-1
V3276	21	44776244	44811506	-1.83578	35263	113164	113166	TIGRP2P287452_rs8734688	BICF2P469034	3	-1
V3279	21	44776244	44811506	-1.77149	35263	113164	113166	TIGRP2P287452_rs8734688	BICF2P469034	3	-1
V3285	21	44776244	44811506	-1.74185	35263	113164	113166	TIGRP2P287452_rs8734688	BICF2P469034	3	-1
V3287	21	44776244	44811506	-1.57311	35263	113164	113166	TIGRP2P287452_rs8734688	BICF2P469034	3	-1
V3289	21	44776244	44811506	-1.80685	35263	113164	113166	TIGRP2P287452_rs8734688	BICF2P469034	3	-1
V3292	21	44776244	44811506	-2.1538	35263	113164	113166	TIGRP2P287452_rs8734688	BICF2P469034	3	-1
V3268	22	15010194	15031529	-2.13878	21336	114795	114797	BICF2G630319880	BICF2S23756680	3	-1
V3270	22	15010194	15031529	-2.35242	21336	114795	114797	BICF2G630319880	BICF2S23756680	3	-1
V3271	22	15010194	15031529	-0.796358	21336	114795	114797	BICF2G630319880	BICF2S23756680	3	-1
V3275	22	15010194	15031529	-2.04981	21336	114795	114797	BICF2G630319880	BICF2S23756680	3	-1
V3278	22	15010194	15031529	-2.16028	21336	114795	114797	BICF2G630319880	BICF2S23756680	3	-1
V3279	22	15010194	15031529	-2.14054	21336	114795	114797	BICF2G630319880	BICF2S23756680	3	-1
V3285	22	15010194	15031529	-1.77842	21336	114795	114797	BICF2G630319880	BICF2S23756680	3	-1
V3286	22	15010194	15031529	-2.12276	21336	114795	114797	BICF2G630319880	BICF2S23756680	3	-1
V3287	22	15010194	15031529	-1.71824	21336	114795	114797	BICF2G630319880	BICF2S23756680	3	-1
V3289	22	15010194	15031529	-2.01	21336	114795	114797	BICF2G630319880	BICF2S23756680	3	-1
V3292	22	15010194	15031529	-2.17376	21336	114795	114797	BICF2G630319880	BICF2S23756680	3	-1
V3291	22	15031529	15057531	-1.80773	26003	114797	114799	BICF2S23756680	BICF2P1037367	3	-1
V3297	22	15031529	15065288	-2.84013	33760	114797	114800	BICF2S23756680	BICF2P294206	4	-1
V3270	22	17995491	18015306	-2.18944	19816	115027	115029	BICF2S23654013	BICF2G630321511	3	-1
V3293	22	17995491	18015306	-1.53242	19816	115027	115029	BICF2S23654013	BICF2G630321511	3	-1
V3292	22	25057153	25093411	-2.13463	36259	115577	115579	BICF2S23352560	BICF2G630325626	3	-1
V3296	22	25057153	25093411	-1.92912	36259	115577	115579	BICF2S23352560	BICF2G630325626	3	-1
V3276	22	31201052	31279193	-0.552961	78142	116041	116047	BICF2P1109632	BICF2P1467761	7	-1
V3267	22	31279193	31316414	-1.35387	37222	116047	116049	BICF2P1467761	BICF2P367494	3	-1
V3269	22	31279193	31316414	-1.35692	37222	116047	116049	BICF2P1467761	BICF2P367494	3	-1
V3287	22	31473520	31499595	-1.56508	26076	116062	116064	BICF2P1137479	BICF2P998750	3	-1
V3286	22	37620314	37642028	-1.5613	21715	116531	116533	BICF2P234656	BICF2P613165	3	-1
V3293	22	37620314	37642028	-1.26114	21715	116531	116533	BICF2P234656	BICF2P613165	3	-1
V3298	22	37620314	37642028	-1.53218	21715	116531	116533	BICF2P234656	BICF2P613165	3	-1
V3261	22	40237310	40276123	-1.70784	38814	116738	116740	TIGRP2P293657_rs8588741	BICF2P418844	3	-1
V3271	22	40237310	40276123	-1.59478	38814	116738	116740	TIGRP2P293657_rs8588741	BICF2P418844	3	-1
V3289	22	40237310	40276123	-1.60741	38814	116738	116740	TIGRP2P293657_rs8588741	BICF2P418844	3	-1
V3270	22	40276123	40315950	-1.70334	39828	116740	116742	BICF2P418844	BICF2P1307547	3	-1
V3275	22	40276123	40315950	-1.58265	39828	116740	116742	BICF2P418844	BICF2P1307547	3	-1
V3276	22	40276123	40315950	-1.65652	39828	116740	116742	BICF2P418844	BICF2P1307547	3	-1
V3279	22	40276123	40315950	-1.62309	39828	116740	116742	BICF2P418844	BICF2P1307547	3	-1
V3287	22	40276123	40315950	-1.55212	39828	116740	116742	BICF2P418844	BICF2P1307547	3	-1
V3271	22	46067449	46088696	-0.70981	21248	117204	117206	BICF2G630333562	BICF2P696594	3	-1
V3289	22	52977842	53009973	-1.36571	32132	117762	117764	BICF2P558582	BICF2P147329	3	-1
V3269	22	52977842	53026263	-1.24314	48422	117762	117766	BICF2P558582	BICF2P9087	5	-1
V3273	22	52977842	53026263	-1.22739	48422	117762	117766	BICF2P558582	BICF2P9087	5	-1
V3276	22	52977842	53026263	-1.15382	48422	117762	117766	BICF2P558582	BICF2P9087	5	-1
V3285	22	52977842	53026263	-1.07531	48422	117762	117766	BICF2P558582	BICF2P9087	5	-1
V3286	22	52977842	53026263	-1.08994	48422	117762	117766	BICF2P558582	BICF2P9087	5	-1
V3287	22	53621580	53640219	-1.3986	18640	117805	117807	TIGRP2P296772_rs8885518	BICF2S23162162	3	-1
V3271	22	60705459	60716570	-0.875906	11112	118433	118435	BICF2G63092884	BICF2P756713	3	-1
V3269	23	4080354	4096884	-2.12107	16531	118743	118745	TIGRP2P309780_rs9216837	BICF2P535874	3	-1
V3292	23	4080354	4096884	-1.68416	16531	118743	118745	TIGRP2P309780_rs9216837	BICF2P535874	3	-1
V3296	23	4080354	4096884	-1.61162	16531	118743	118745	TIGRP2P309780_rs9216837	BICF2P535874	3	-1
V3293	23	15676528	15687429	-1.10435	10902	119698	119700	BICF2G630384649	BICF2G630384631	3	-1
V3256	23	31994075	32018316	-1.64728	24242	121023	121025	BICF2G630373727	BICF2G630373685	3	-1
V3289	23	31994075	32018316	-1.5978	24242	121023	121025	BICF2G630373727	BICF2G630373685	3	-1
V3292	23	31994075	32018316	-1.48259	24242	121023	121025	BICF2G630373727	BICF2G630373685	3	-1
V3268	23	35651306	35674044	-1.83109	22739	121282	121284	BICF2S23218301	BICF2G630371909	3	-1
V3271	23	35651306	35674044	-1.72237	22739	121282	121284	BICF2S23218301	BICF2G630371909	3	-1
V3279	23	35651306	35674044	-1.84741	22739	121282	121284	BICF2S23218301	BICF2G630371909	3	-1
V3292	23	35651306	35674044	-1.88015	22739	121282	121284	BICF2S23218301	BICF2G630371909	3	-1
V3293	23	35651306	35674044	-1.89382	22739	121282	121284	BICF2S23218301	BICF2G630371909	3	-1
V3295	23	35651306	35674044	-1.73051	22739	121282	121284	BICF2S23218301	BICF2G630371909	3	-1
V3252	23	35674044	35701291	-1.82368	27248	121284	121286	BICF2G630371909	BICF2G630371892	3	-1
V3254	23	35674044	35701291	-1.90905	27248	121284	121286	BICF2G630371909	BICF2G630371892	3	-1
V3261	23	35674044	35701291	-1.88619	27248	121284	121286	BICF2G630371909	BICF2G630371892	3	-1
V3269	23	35674044	35701291	-1.88117	27248	121284	121286	BICF2G630371909	BICF2G630371892	3	-1
V3270	23	35674044	35701291	-1.78934	27248	121284	121286	BICF2G630371909	BICF2G630371892	3	-1
V3275	23	35674044	35701291	-1.84058	27248	121284	121286	BICF2G630371909	BICF2G630371892	3	-1
V3280	23	35674044	35701291	-1.84975	27248	121284	121286	BICF2G630371909	BICF2G630371892	3	-1
V3285	23	35674044	35701291	-1.75921	27248	121284	121286	BICF2G630371909	BICF2G630371892	3	-1
V3286	23	35674044	35701291	-1.66049	27248	121284	121286	BICF2G630371909	BICF2G630371892	3	-1
V3291	23	35674044	35701291	-1.77919	27248	121284	121286	BICF2G630371909	BICF2G630371892	3	-1
V3296	23	35674044	35701291	-1.87112	27248	121284	121286	BICF2G630371909	BICF2G630371892	3	-1
V3273	23	41381599	41400650	-2.33836	19052	121738	121740	BICF2S22933334	BICF2P383035	3	-1
V3286	23	41381599	41400650	-2.43083	19052	121738	121740	BICF2S22933334	BICF2P383035	3	-1
V3297	23	41381599	41400650	-2.81819	19052	121738	121740	BICF2S22933334	BICF2P383035	3	-1
V3298	23	41381599	41400650	-2.22963	19052	121738	121740	BICF2S22933334	BICF2P383035	3	-1
V3280	23	51836326	52291577	-0.279249	455252	122600	122639	BICF2P1079607	BICF2P374432	40	-1
V3256	23	51850435	52291577	-0.258814	441143	122601	122639	BICF2S23528933	BICF2P374432	39	-1
V3252	23	51871689	52291577	-0.290643	419889	122603	122639	BICF2P373712	BICF2P374432	37	-1
V3278	23	51871689	52291577	-0.352735	419889	122603	122639	BICF2P373712	BICF2P374432	37	-1
V3254	23	51906828	52291577	-0.277923	384750	122606	122639	BICF2S23549391	BICF2P374432	34	-1
V3268	23	51906828	52291577	-0.331228	384750	122606	122639	BICF2S23549391	BICF2P374432	34	-1
V3270	23	51906828	52291577	-0.361048	384750	122606	122639	BICF2S23549391	BICF2P374432	34	-1
V3271	23	51906828	52291577	-0.388505	384750	122606	122639	BICF2S23549391	BICF2P374432	34	-1
V3275	23	51906828	52291577	-0.363599	384750	122606	122639	BICF2S23549391	BICF2P374432	34	-1
V3279	23	51906828	52291577	-0.389712	384750	122606	122639	BICF2S23549391	BICF2P374432	34	-1
V3285	23	51906828	52291577	-0.245277	384750	122606	122639	BICF2S23549391	BICF2P374432	34	-1
V3286	23	51906828	52291577	-0.278369	384750	122606	122639	BICF2S23549391	BICF2P374432	34	-1
V3289	23	51906828	52291577	-0.242001	384750	122606	122639	BICF2S23549391	BICF2P374432	34	-1
V3293	23	51906828	52291577	-0.366642	384750	122606	122639	BICF2S23549391	BICF2P374432	34	-1
V3295	23	51906828	52291577	-0.347557	384750	122606	122639	BICF2S23549391	BICF2P374432	34	-1
V3297	23	51906828	52291577	-0.225326	384750	122606	122639	BICF2S23549391	BICF2P374432	34	-1
V3298	23	51906828	52291577	-0.28274	384750	122606	122639	BICF2S23549391	BICF2P374432	34	-1
V3261	23	52019203	52291577	-0.43752	272375	122614	122639	BICF2P810953	BICF2P374432	26	-1
V3269	23	52019203	52291577	-0.444899	272375	122614	122639	BICF2P810953	BICF2P374432	26	-1
V3291	23	52265432	52291577	-1.89473	26146	122637	122639	G1240f12S188	BICF2P374432	3	-1
V3292	23	52265432	52291577	-1.91683	26146	122637	122639	G1240f12S188	BICF2P374432	3	-1
V3287	24	7886712	7930382	-0.715379	43671	123208	123212	BICF2G630512555	BICF2G630512485	5	-1
V3289	24	9688173	9705089	-1.29607	16917	123348	123350	BICF2G630511320	BICF2P168293	3	-1
V3286	24	16674393	16690790	-2.09954	16398	123946	123948	BICF2G630505640	BICF2G630505628	3	-1
V3285	24	16690790	16721266	-2.16683	30477	123948	123950	BICF2G630505628	BICF2G630505608	3	-1
V3298	24	24141877	24160287	-1.63861	18411	124515	124517	BICF2P826942	BICF2P393540	3	-1
V3269	24	24160287	24188357	-1.60527	28071	124517	124519	BICF2P393540	BICF2P68034	3	-1
V3252	24	29372867	29389500	-1.58933	16634	124982	124984	BICF2P907686	BICF2P750683	3	-1
V3276	24	30021797	30051788	-1.65907	29992	125027	125029	BICF2S23448448	BICF2S23028825	3	-1
V3287	24	32179601	32200587	-0.810143	20987	125197	125199	BICF2P636461	BICF2G630498871	3	-1
V3295	24	32179601	32200587	-1.27636	20987	125197	125199	BICF2P636461	BICF2G630498871	3	-1
V3286	24	32854967	32869038	-2.9665	14072	125251	125253	BICF2P306677	BICF2P1285787	3	-1
V3267	24	39292205	39306565	-2.23232	14361	125759	125761	TIGRP2P319831_rs8958337	BICF2P156489	3	-1
V3273	24	39292205	39306565	-2.1887	14361	125759	125761	TIGRP2P319831_rs8958337	BICF2P156489	3	-1
V3276	24	39292205	39306565	-2.16954	14361	125759	125761	TIGRP2P319831_rs8958337	BICF2P156489	3	-1
V3280	24	39292205	39306565	-2.30666	14361	125759	125761	TIGRP2P319831_rs8958337	BICF2P156489	3	-1
V3285	24	39292205	39306565	-2.06094	14361	125759	125761	TIGRP2P319831_rs8958337	BICF2P156489	3	-1
V3286	24	39292205	39306565	-2.08063	14361	125759	125761	TIGRP2P319831_rs8958337	BICF2P156489	3	-1
V3278	24	39294546	39322997	-2.13686	28452	125760	125762	BICF2P1287999	BICF2P1116741	3	-1
V3292	24	39294546	39322997	-1.95321	28452	125760	125762	BICF2P1287999	BICF2P1116741	3	-1
V3295	24	39294546	39322997	-2.00381	28452	125760	125762	BICF2P1287999	BICF2P1116741	3	-1
V3296	24	39294546	39322997	-2.17987	28452	125760	125762	BICF2P1287999	BICF2P1116741	3	-1
V3286	24	42690706	42714739	-2.16006	24034	126036	126038	BICF2S23547652	BICF2G630496499	3	-1
V3256	24	42824397	42855647	-1.89285	31251	126048	126050	BICF2P354426	TIGRP2P320868_rs8623523	3	-1
V3296	24	46328677	46346859	-1.12288	18183	126330	126332	BICF2P903505	BICF2P166909	3	-1
V3252	24	46471766	46497406	-1.39983	25641	126342	126344	BICF2G630496156	BICF2S23238071	3	-1
V3256	24	46471766	46497406	-1.18128	25641	126342	126344	BICF2G630496156	BICF2S23238071	3	-1
V3267	24	46471766	46497406	-1.61888	25641	126342	126344	BICF2G630496156	BICF2S23238071	3	-1
V3297	24	46471766	46497406	-1.30782	25641	126342	126344	BICF2G630496156	BICF2S23238071	3	-1
V3296	24	47000283	47064507	-0.861695	64225	126394	126399	BICF2G630495540	BICF2S23654235	6	-1
V3297	25	69829	165343	-0.42328	95515	126447	126451	TIGRP2P323681_rs8311007	BICF2P687621	5	-1
V3276	25	6848719	6881094	-0.758557	32376	126897	126899	BICF2G630470546	BICF2G630470543	3	-1
V3278	25	6848719	6881094	-2.60216	32376	126897	126899	BICF2G630470546	BICF2G630470543	3	-1
V3291	25	6848719	6881094	-2.39649	32376	126897	126899	BICF2G630470546	BICF2G630470543	3	-1
V3252	25	11546672	11560384	-3.33204	13713	127275	127277	TIGRP2P324793_rs9205367	BICF2G630468059	3	-1
V3280	25	11546672	11560384	-2.4351	13713	127275	127277	TIGRP2P324793_rs9205367	BICF2G630468059	3	-1
V3297	25	11679259	11697942	-0.629143	18684	127287	127289	TIGRP2P324832_rs9013428	BICF2G630467924	3	-1
V3271	25	17551764	17582975	-1.10811	31212	127742	127745	BICF2P638694	TIGRP2P326021_rs8842805	4	-1
V3287	25	25450114	25467242	-1.20139	17129	128335	128337	BICF2G63094772	BICF2G63094787	3	-1
V3291	25	25450114	25467242	-1.1479	17129	128335	128337	BICF2G63094772	BICF2G63094787	3	-1
V3285	25	33212048	33230226	-1.98922	18179	129003	129005	BICF2G630101472	BICF2P599432	3	-1
V3289	25	33212048	33230226	-1.89913	18179	129003	129005	BICF2G630101472	BICF2P599432	3	-1
V3293	25	33212048	33230226	-1.88868	18179	129003	129005	BICF2G630101472	BICF2P599432	3	-1
V3295	25	33212048	33230226	-1.89761	18179	129003	129005	BICF2G630101472	BICF2P599432	3	-1
V3297	25	33212048	33230226	-1.96737	18179	129003	129005	BICF2G630101472	BICF2P599432	3	-1
V3256	25	37096236	37132348	-2.78007	36113	129345	129347	BICF2S23610148	G1292f1S301	3	-1
V3268	25	37132348	37166654	-2.65274	34307	129347	129349	G1292f1S301	BICF2P263284	3	-1
V3271	25	37132348	37166654	-3.02552	34307	129347	129349	G1292f1S301	BICF2P263284	3	-1
V3273	25	37132348	37166654	-2.51024	34307	129347	129349	G1292f1S301	BICF2P263284	3	-1
V3275	25	37132348	37166654	-2.25865	34307	129347	129349	G1292f1S301	BICF2P263284	3	-1
V3276	25	37132348	37166654	-2.33391	34307	129347	129349	G1292f1S301	BICF2P263284	3	-1
V3278	25	37132348	37166654	-2.20866	34307	129347	129349	G1292f1S301	BICF2P263284	3	-1
V3286	25	37132348	37166654	-2.03589	34307	129347	129349	G1292f1S301	BICF2P263284	3	-1
V3295	25	37132348	37166654	-2.37465	34307	129347	129349	G1292f1S301	BICF2P263284	3	-1
V3296	25	37132348	37166654	-3.42873	34307	129347	129349	G1292f1S301	BICF2P263284	3	-1
V3261	25	41096846	41140495	-2.50737	43650	129679	129681	BICF2P1305599	BICF2P759159	3	-1
V3297	25	41096846	41140495	-0.79755	43650	129679	129681	BICF2P1305599	BICF2P759159	3	-1
V3254	25	43452774	43476369	-0.740493	23596	129880	129882	BICF2G630105110	BICF2G630105132	3	-1
V3289	25	45265659	45289275	-1.48304	23617	130030	130032	TIGRP2P332593_rs8826811	BICF2S23330039	3	-1
V3254	25	46944406	46981477	-1.00604	37072	130186	130188	BICF2S23125237	BICF2S23240316	3	-1
V3271	25	46944406	46981477	-1.2291	37072	130186	130188	BICF2S23125237	BICF2S23240316	3	-1
V3278	25	46944406	46981477	-1.21072	37072	130186	130188	BICF2S23125237	BICF2S23240316	3	-1
V3279	25	46944406	46981477	-1.12765	37072	130186	130188	BICF2S23125237	BICF2S23240316	3	-1
V3297	25	46944406	46981477	-0.861281	37072	130186	130188	BICF2S23125237	BICF2S23240316	3	-1
V3268	25	47352079	47372977	-2.21623	20899	130220	130222	TIGRP2P333568_rs9165933	BICF2G630159679	3	-1
V3269	25	47352079	47372977	-2.43604	20899	130220	130222	TIGRP2P333568_rs9165933	BICF2G630159679	3	-1
V3270	25	47352079	47372977	-2.20722	20899	130220	130222	TIGRP2P333568_rs9165933	BICF2G630159679	3	-1
V3254	25	48611803	48662322	-0.919662	50520	130331	130336	BICF2P792692	BICF2G630158483	6	-1
V3267	25	48611803	48662322	-0.955496	50520	130331	130336	BICF2P792692	BICF2G630158483	6	-1
V3270	25	48611803	48662322	-1.11091	50520	130331	130336	BICF2P792692	BICF2G630158483	6	-1
V3271	25	48611803	48662322	-1.09032	50520	130331	130336	BICF2P792692	BICF2G630158483	6	-1
V3276	25	48611803	48662322	-0.673679	50520	130331	130336	BICF2P792692	BICF2G630158483	6	-1
V3278	25	48611803	48662322	-1.05414	50520	130331	130336	BICF2P792692	BICF2G630158483	6	-1
V3279	25	48611803	48662322	-1.01663	50520	130331	130336	BICF2P792692	BICF2G630158483	6	-1
V3291	25	48611803	48662322	-0.949904	50520	130331	130336	BICF2P792692	BICF2G630158483	6	-1
V3296	25	48611803	48662322	-1.02204	50520	130331	130336	BICF2P792692	BICF2G630158483	6	-1
V3297	25	48611803	48662322	-0.744924	50520	130331	130336	BICF2P792692	BICF2G630158483	6	-1
V3298	25	48611803	48662322	-0.972581	50520	130331	130336	BICF2P792692	BICF2G630158483	6	-1
V3276	25	50299773	51088717	-0.390917	788945	130461	130494	BICF2P1062573	BICF2P506646	34	-1
V3254	25	50314369	51088717	-0.598846	774349	130462	130494	TIGRP2P335336_rs9166663	BICF2P506646	33	-1
V3267	25	50314369	51088717	-0.604275	774349	130462	130494	TIGRP2P335336_rs9166663	BICF2P506646	33	-1
V3269	25	50314369	51088717	-0.659707	774349	130462	130494	TIGRP2P335336_rs9166663	BICF2P506646	33	-1
V3270	25	50314369	51088717	-0.598057	774349	130462	130494	TIGRP2P335336_rs9166663	BICF2P506646	33	-1
V3271	25	50314369	51088717	-0.639089	774349	130462	130494	TIGRP2P335336_rs9166663	BICF2P506646	33	-1
V3278	25	50314369	51088717	-0.637857	774349	130462	130494	TIGRP2P335336_rs9166663	BICF2P506646	33	-1
V3279	25	50314369	51088717	-0.614247	774349	130462	130494	TIGRP2P335336_rs9166663	BICF2P506646	33	-1
V3291	25	50314369	51088717	-0.534295	774349	130462	130494	TIGRP2P335336_rs9166663	BICF2P506646	33	-1
V3296	25	50314369	51088717	-0.589528	774349	130462	130494	TIGRP2P335336_rs9166663	BICF2P506646	33	-1
V3298	25	50314369	51088717	-0.519526	774349	130462	130494	TIGRP2P335336_rs9166663	BICF2P506646	33	-1
V3297	25	50345174	51086372	-0.463261	741199	130464	130493	BICF2G630156379	BICF2P315396	30	-1
V3289	25	50345174	51088717	-0.345946	743544	130464	130494	BICF2G630156379	BICF2P506646	31	-1
V3254	25	51411971	51455830	-0.971452	43860	130520	130522	BICF2G630190178	BICF2G630190170	3	-1
V3256	26	6624391	6649948	-1.10961	25558	131078	131080	BICF2P423872	BICF2P336674	3	-1
V3268	26	10249541	10261812	-1.15235	12272	131336	131338	BICF2G630806419	BICF2G630806395	3	-1
V3273	26	13993470	14002319	-1.61997	8850	131668	131670	BICF2G630803304	BICF2G630803289	3	-1
V3297	26	13993470	14002319	-1.7327	8850	131668	131670	BICF2G630803304	BICF2G630803289	3	-1
V3268	26	16825497	16888919	-0.880403	63423	131912	131915	BICF2P561688	BICF2P277389	4	-1
V3289	26	16825497	16888919	-0.728536	63423	131912	131915	BICF2P561688	BICF2P277389	4	-1
V3254	26	16851576	16888919	-1.57543	37344	131913	131915	TIGRP2P338736_rs8965462	BICF2P277389	3	-1
V3256	26	16851576	16888919	-0.832075	37344	131913	131915	TIGRP2P338736_rs8965462	BICF2P277389	3	-1
V3261	26	17473721	17480462	-1.14294	6742	131960	131962	BICF2P1470656	BICF2P480782	3	-1
V3278	26	17473721	17480462	-1.01598	6742	131960	131962	BICF2P1470656	BICF2P480782	3	-1
V3291	26	17473721	17480462	-0.709691	6742	131960	131962	BICF2P1470656	BICF2P480782	3	-1
V3287	26	25562040	25750678	-2.43342	188639	132545	132547	BICF2P747721	BICF2P958208	3	-1
V3278	26	29543486	29582533	-0.783731	39048	132752	132756	BICF2P767593	BICF2P1375952	5	-1
V3268	26	29568722	29582533	-1.04338	13812	132754	132756	BICF2P509454	BICF2P1375952	3	-1
V3267	26	33100880	33132648	-1.93773	31769	133022	133024	BICF2P1031438	BICF2S2316342	3	-1
V3271	26	33100880	33132648	-1.9126	31769	133022	133024	BICF2P1031438	BICF2S2316342	3	-1
V3276	26	33100880	33132648	-1.90351	31769	133022	133024	BICF2P1031438	BICF2S2316342	3	-1
V3280	26	33100880	33132648	-1.96087	31769	133022	133024	BICF2P1031438	BICF2S2316342	3	-1
V3295	26	33100880	33132648	-1.75734	31769	133022	133024	BICF2P1031438	BICF2S2316342	3	-1
V3298	26	33100880	33132648	-1.86089	31769	133022	133024	BICF2P1031438	BICF2S2316342	3	-1
V3273	26	34409654	34413826	-1.80443	4173	133135	133137	BICF2P854140	BICF2G630197876	3	-1
V3297	26	34409654	34413826	-1.93011	4173	133135	133137	BICF2P854140	BICF2G630197876	3	-1
V3286	26	34413826	34443540	-1.863	29715	133137	133139	BICF2G630197876	BICF2G630197810	3	-1
V3256	26	35275471	35306964	-1.3772	31494	133210	133212	BICF2P1283526	BICF2P1144731	3	-1
V3291	26	38012570	38049729	-0.762043	37160	133466	133469	TIGRP2P345501_rs8930711	BICF2G630193056	4	-1
V3278	26	38677458	38735695	-0.624785	58238	133527	133532	BICF2P645716	BICF2S23716396	6	-1
V3252	27	911310	954870	-1.36352	43561	133618	133621	BICF2P582817	BICF2P289821	4	-1
V3254	27	911310	954870	-1.40325	43561	133618	133621	BICF2P582817	BICF2P289821	4	-1
V3256	27	911310	954870	-1.29975	43561	133618	133621	BICF2P582817	BICF2P289821	4	-1
V3261	27	911310	954870	-1.3021	43561	133618	133621	BICF2P582817	BICF2P289821	4	-1
V3267	27	911310	954870	-1.36656	43561	133618	133621	BICF2P582817	BICF2P289821	4	-1
V3268	27	911310	954870	-1.39369	43561	133618	133621	BICF2P582817	BICF2P289821	4	-1
V3269	27	911310	954870	-1.3697	43561	133618	133621	BICF2P582817	BICF2P289821	4	-1
V3270	27	911310	954870	-1.43736	43561	133618	133621	BICF2P582817	BICF2P289821	4	-1
V3271	27	911310	954870	-1.48492	43561	133618	133621	BICF2P582817	BICF2P289821	4	-1
V3275	27	911310	954870	-1.52261	43561	133618	133621	BICF2P582817	BICF2P289821	4	-1
V3285	27	911310	954870	-1.42479	43561	133618	133621	BICF2P582817	BICF2P289821	4	-1
V3286	27	911310	954870	-1.38969	43561	133618	133621	BICF2P582817	BICF2P289821	4	-1
V3287	27	911310	954870	-0.981232	43561	133618	133621	BICF2P582817	BICF2P289821	4	-1
V3293	27	911310	954870	-1.3093	43561	133618	133621	BICF2P582817	BICF2P289821	4	-1
V3295	27	911310	954870	-1.27949	43561	133618	133621	BICF2P582817	BICF2P289821	4	-1
V3296	27	911310	954870	-1.40487	43561	133618	133621	BICF2P582817	BICF2P289821	4	-1
V3297	27	911310	954870	-1.3757	43561	133618	133621	BICF2P582817	BICF2P289821	4	-1
V3252	27	2231714	2257152	-0.861359	25439	133727	133729	BICF2G630138149	BICF2P125273	3	-1
V3268	27	2231714	2257152	-0.867	25439	133727	133729	BICF2G630138149	BICF2P125273	3	-1
V3269	27	2231714	2257152	-0.814924	25439	133727	133729	BICF2G630138149	BICF2P125273	3	-1
V3275	27	2231714	2257152	-2.15788	25439	133727	133729	BICF2G630138149	BICF2P125273	3	-1
V3285	27	2231714	2257152	-0.777125	25439	133727	133729	BICF2G630138149	BICF2P125273	3	-1
V3275	27	2869179	2886074	-0.755502	16896	133789	133791	BICF2G630138664	BICF2G630138678	3	-1
V3268	27	2869179	2904028	-0.729209	34850	133789	133792	BICF2G630138664	BICF2G630138694	4	-1
V3269	27	15335281	15363338	-1.79068	28058	134748	134750	BICF2G630145389	BICF2S23248210	3	-1
V3273	27	15335281	15363338	-1.9825	28058	134748	134750	BICF2G630145389	BICF2S23248210	3	-1
V3291	27	15335281	15363338	-1.67219	28058	134748	134750	BICF2G630145389	BICF2S23248210	3	-1
V3252	27	17907955	17929067	-0.848031	21113	134944	134946	BICF2G630147479	BICF2G630147500	3	-1
V3256	27	17907955	17929067	-3.73995	21113	134944	134946	BICF2G630147479	BICF2G630147500	3	-1
V3276	27	17907955	17929067	-3.29833	21113	134944	134946	BICF2G630147479	BICF2G630147500	3	-1
V3289	27	17907955	17929067	-3.5441	21113	134944	134946	BICF2G630147479	BICF2G630147500	3	-1
V3278	27	17921151	17941754	-3.51579	20604	134945	134947	BICF2G630147492	BICF2G630147514	3	-1
V3285	27	17921151	17941754	-4.12075	20604	134945	134947	BICF2G630147492	BICF2G630147514	3	-1
V3271	27	19678326	19701607	-1.82605	23282	135087	135089	BICF2P376955	TIGRP2P350290_rs8751170	3	-1
V3293	27	19678326	19701607	-1.51279	23282	135087	135089	BICF2P376955	TIGRP2P350290_rs8751170	3	-1
V3297	27	19701607	19730267	-1.56917	28661	135089	135091	TIGRP2P350290_rs8751170	TIGRP2P350297_rs9162487	3	-1
V3285	27	25695551	25753779	-1.96281	58229	135551	135553	TIGRP2P351680_rs8666747	BICF2G630150826	3	-1
V3287	27	25695551	25753779	-1.25476	58229	135551	135553	TIGRP2P351680_rs8666747	BICF2G630150826	3	-1
V3254	27	25695551	25760276	-2.22996	64726	135551	135554	TIGRP2P351680_rs8666747	BICF2G630150840	4	-1
V3271	27	25695551	25760276	-2.1045	64726	135551	135554	TIGRP2P351680_rs8666747	BICF2G630150840	4	-1
V3280	27	25695551	25760276	-2.28644	64726	135551	135554	TIGRP2P351680_rs8666747	BICF2G630150840	4	-1
V3252	27	25695551	25810881	-0.774986	115331	135551	135561	TIGRP2P351680_rs8666747	BICF2G630150974	11	-1
V3256	27	25695551	25810881	-0.918443	115331	135551	135561	TIGRP2P351680_rs8666747	BICF2G630150974	11	-1
V3268	27	25695551	25810881	-0.712096	115331	135551	135561	TIGRP2P351680_rs8666747	BICF2G630150974	11	-1
V3269	27	25695551	25810881	-0.764052	115331	135551	135561	TIGRP2P351680_rs8666747	BICF2G630150974	11	-1
V3275	27	25695551	25810881	-0.725914	115331	135551	135561	TIGRP2P351680_rs8666747	BICF2G630150974	11	-1
V3289	27	25695551	25810881	-0.82887	115331	135551	135561	TIGRP2P351680_rs8666747	BICF2G630150974	11	-1
V3295	27	25695551	25810881	-0.738118	115331	135551	135561	TIGRP2P351680_rs8666747	BICF2G630150974	11	-1
V3296	27	25695551	25810881	-1.26048	115331	135551	135561	TIGRP2P351680_rs8666747	BICF2G630150974	11	-1
V3269	27	26930132	26948774	-1.1187	18643	135642	135644	BICF2G630151878	BICF2G630151908	3	-1
V3295	27	26940098	26969946	-1.2189	29849	135643	135645	BICF2G630151889	BICF2G630151917	3	-1
V3269	27	30011338	30033889	-1.6566	22552	135867	135869	BICF2P1269595	BICF2P312924	3	-1
V3254	27	30024327	30063874	-1.6352	39548	135868	135870	BICF2P775823	BICF2S2317625	3	-1
V3287	27	30024327	30063874	-1.54203	39548	135868	135870	BICF2P775823	BICF2S2317625	3	-1
V3256	27	34423655	34434372	-2.34913	10718	136221	136223	BICF2P571747	BICF2P794774	3	-1
V3261	27	34434372	34453731	-2.2162	19360	136223	136225	BICF2P794774	BICF2P1268296	3	-1
V3268	27	34434372	34453731	-3.00523	19360	136223	136225	BICF2P794774	BICF2P1268296	3	-1
V3270	27	34434372	34453731	-2.18595	19360	136223	136225	BICF2P794774	BICF2P1268296	3	-1
V3275	27	34434372	34453731	-2.064	19360	136223	136225	BICF2P794774	BICF2P1268296	3	-1
V3279	27	34434372	34453731	-2.41697	19360	136223	136225	BICF2P794774	BICF2P1268296	3	-1
V3271	27	35584556	35618891	-2.46561	34336	136299	136301	G1331f26S193	BICF2S22946237	3	-1
V3280	27	35584556	35618891	-2.4711	34336	136299	136301	G1331f26S193	BICF2S22946237	3	-1
V3267	27	35668312	35697964	-1.46766	29653	136305	136307	TIGRP2P355141_rs8614546	TIGRP2P355154_rs9171624	3	-1
V3252	27	37197866	37216858	-0.612406	18993	136419	136421	TIGRP2P355700_rs9173054	BICF2P154172	3	-1
V3286	27	37553166	37583571	-0.594239	30406	136442	136445	BICF2P771053	BICF2P1413627	4	-1
V3269	27	37693778	37729936	-2.38651	36159	136452	136454	BICF2P1105287	BICF2S23734857	3	-1
V3269	27	42837007	43773978	-0.17119	936972	136873	136931	BICF2S23159353	BICF2G630154911	59	-1
V3252	27	45383402	45426671	-0.703648	43270	137067	137069	BICF2S23428366	TIGRP2P356827_rs8612111	3	-1
V3297	28	12345258	12377929	-2.05845	32672	137928	137930	BICF2G630274861	BICF2P1153166	3	-1
V3286	28	12365408	12391576	-0.904653	26169	137929	137931	BICF2P1226193	BICF2P447821	3	-1
V3298	28	28059535	28080745	-1.1446	21211	139199	139201	BICF2P987225	BICF2P747434	3	-1
V3254	28	29965471	30007507	-2.24408	42037	139350	139352	BICF2S2456333	BICF2P602157	3	-1
V3261	28	29965471	30007507	-2.17588	42037	139350	139352	BICF2S2456333	BICF2P602157	3	-1
V3267	28	29965471	30007507	-2.26716	42037	139350	139352	BICF2S2456333	BICF2P602157	3	-1
V3268	28	29965471	30007507	-2.2108	42037	139350	139352	BICF2S2456333	BICF2P602157	3	-1
V3270	28	29965471	30007507	-2.32248	42037	139350	139352	BICF2S2456333	BICF2P602157	3	-1
V3279	28	29965471	30007507	-2.09195	42037	139350	139352	BICF2S2456333	BICF2P602157	3	-1
V3280	28	29965471	30007507	-2.19363	42037	139350	139352	BICF2S2456333	BICF2P602157	3	-1
V3287	28	29965471	30007507	-2.08077	42037	139350	139352	BICF2S2456333	BICF2P602157	3	-1
V3289	28	29965471	30007507	-2.18491	42037	139350	139352	BICF2S2456333	BICF2P602157	3	-1
V3296	28	29965471	30007507	-1.82244	42037	139350	139352	BICF2S2456333	BICF2P602157	3	-1
V3297	28	29965471	30007507	-2.13082	42037	139350	139352	BICF2S2456333	BICF2P602157	3	-1
V3276	28	40299547	41175293	-0.186063	875747	140284	140353	BICF2G630108823	TIGRP2P278766_rs8517909	70	-1
V3278	28	40299547	41175293	-0.460365	875747	140284	140353	BICF2G630108823	TIGRP2P278766_rs8517909	70	-1
V3280	28	40299547	41175293	-0.368791	875747	140284	140353	BICF2G630108823	TIGRP2P278766_rs8517909	70	-1
V3285	28	40299547	41175293	-0.251957	875747	140284	140353	BICF2G630108823	TIGRP2P278766_rs8517909	70	-1
V3295	28	40299547	41175293	-0.39403	875747	140284	140353	BICF2G630108823	TIGRP2P278766_rs8517909	70	-1
V3289	28	40325378	41175293	-0.218603	849916	140286	140353	BICF2P319846	TIGRP2P278766_rs8517909	68	-1
V3273	29	2108234	2139791	-0.878932	31558	140492	140495	BICF2P572658	TIGRP2P367609_rs9110851	4	-1
V3252	29	2117784	2139791	-0.921011	22008	140493	140495	BICF2G630622085	TIGRP2P367609_rs9110851	3	-1
V3271	29	2117784	2139791	-2.43855	22008	140493	140495	BICF2G630622085	TIGRP2P367609_rs9110851	3	-1
V3276	29	2117784	2139791	-0.87386	22008	140493	140495	BICF2G630622085	TIGRP2P367609_rs9110851	3	-1
V3291	29	2117784	2139791	-2.45145	22008	140493	140495	BICF2G630622085	TIGRP2P367609_rs9110851	3	-1
V3295	29	2117784	2139791	-0.974737	22008	140493	140495	BICF2G630622085	TIGRP2P367609_rs9110851	3	-1
V3296	29	2117784	2139791	-0.935718	22008	140493	140495	BICF2G630622085	TIGRP2P367609_rs9110851	3	-1
V3269	29	10359710	10388621	-0.940093	28912	141114	141116	BICF2P403740	BICF2P939990	3	-1
V3295	29	10359710	10388621	-0.953547	28912	141114	141116	BICF2P403740	BICF2P939990	3	-1
V3270	29	21319977	21339501	-0.773514	19525	141978	141980	BICF2G630623427	BICF2G630623461	3	-1
V3275	29	21319977	21339501	-0.807476	19525	141978	141980	BICF2G630623427	BICF2G630623461	3	-1
V3276	29	21319977	21339501	-0.770577	19525	141978	141980	BICF2G630623427	BICF2G630623461	3	-1
V3292	29	21319977	21339501	-1.04224	19525	141978	141980	BICF2G630623427	BICF2G630623461	3	-1
V3293	29	21319977	21339501	-0.775274	19525	141978	141980	BICF2G630623427	BICF2G630623461	3	-1
V3297	29	21319977	21339501	-0.74678	19525	141978	141980	BICF2G630623427	BICF2G630623461	3	-1
V3261	29	28407024	28428927	-2.12627	21904	142552	142554	BICF2P570175	BICF2G630628206	3	-1
V3267	29	28407024	28428927	-1.7992	21904	142552	142554	BICF2P570175	BICF2G630628206	3	-1
V3287	29	28407024	28428927	-1.81014	21904	142552	142554	BICF2P570175	BICF2G630628206	3	-1
V3270	29	29518062	29545897	-0.841014	27836	142625	142627	BICF2G630628944	BICF2G630628982	3	-1
V3275	29	29518062	29545897	-0.79319	27836	142625	142627	BICF2G630628944	BICF2G630628982	3	-1
V3297	29	29518062	29545897	-0.71195	27836	142625	142627	BICF2G630628944	BICF2G630628982	3	-1
V3273	29	29979409	30022802	-2.91861	43394	142664	142666	BICF2G630629366	BICF2P720943	3	-1
V3292	30	23621092	23632835	-1.94575	11744	145189	145191	BICF2G630403804	BICF2S23037967	3	-1
V3273	30	27754272	27774223	-2.31396	19952	145550	145552	BICF2P1183475	BICF2P912260	3	-1
V3297	30	27754272	27774223	-1.84253	19952	145550	145552	BICF2P1183475	BICF2P912260	3	-1
V3254	30	28031515	28060716	-1.70518	29202	145573	145575	BICF2P1351799	BICF2P931438	3	-1
V3256	30	28031515	28060716	-1.6822	29202	145573	145575	BICF2P1351799	BICF2P931438	3	-1
V3261	30	28031515	28060716	-1.77311	29202	145573	145575	BICF2P1351799	BICF2P931438	3	-1
V3270	30	28031515	28060716	-1.70957	29202	145573	145575	BICF2P1351799	BICF2P931438	3	-1
V3276	30	28031515	28060716	-1.98916	29202	145573	145575	BICF2P1351799	BICF2P931438	3	-1
V3298	30	28031515	28060716	-1.53882	29202	145573	145575	BICF2P1351799	BICF2P931438	3	-1
V3252	30	28045260	28074620	-1.67498	29361	145574	145576	BICF2S23351380	BICF2S23014531	3	-1
V3285	30	28045260	28074620	-1.71415	29361	145574	145576	BICF2S23351380	BICF2S23014531	3	-1
V3289	30	28045260	28074620	-1.65853	29361	145574	145576	BICF2S23351380	BICF2S23014531	3	-1
V3291	30	28045260	28074620	-1.62555	29361	145574	145576	BICF2S23351380	BICF2S23014531	3	-1
V3268	30	28060716	28082737	-1.59259	22022	145575	145577	BICF2P931438	BICF2P700590	3	-1
V3269	30	28060716	28082737	-1.68276	22022	145575	145577	BICF2P931438	BICF2P700590	3	-1
V3271	30	28060716	28082737	-1.58456	22022	145575	145577	BICF2P931438	BICF2P700590	3	-1
V3275	30	28060716	28082737	-1.5732	22022	145575	145577	BICF2P931438	BICF2P700590	3	-1
V3286	30	28060716	28082737	-1.62986	22022	145575	145577	BICF2P931438	BICF2P700590	3	-1
V3287	30	28060716	28082737	-1.58203	22022	145575	145577	BICF2P931438	BICF2P700590	3	-1
V3296	30	32552907	32576570	-2.00451	23664	145930	145932	BICF2G630399293	BICF2G630399248	3	-1
V3254	30	32564862	32586719	-2.59327	21858	145931	145933	BICF2G630399269	BICF2G630399218	3	-1
V3278	30	32564862	32586719	-2.09669	21858	145931	145933	BICF2G630399269	BICF2G630399218	3	-1
V3292	30	32564862	32586719	-2.39969	21858	145931	145933	BICF2G630399269	BICF2G630399218	3	-1
V3295	30	32564862	32586719	-2.14473	21858	145931	145933	BICF2G630399269	BICF2G630399218	3	-1
V3280	30	32576570	32600807	-2.27205	24238	145932	145934	BICF2G630399248	BICF2G630399181	3	-1
V3275	30	38464411	38810000	-0.315048	345590	146422	146453	BICF2G630395196	BICF2G630394836	32	-1
V3291	30	38564729	38810000	-0.326256	245272	146431	146453	BICF2P179456	BICF2G630394836	23	-1
V3291	30	38826297	39200410	0.175547	374114	146454	146488	BICF2P1041316	BICF2G630394492	35	1
V3254	30	39210734	39318243	-0.894663	107510	146489	146497	TIGRP2P374453_rs8823989	BICF2G630394300	9	-1
V3269	30	39210734	39318243	-0.875568	107510	146489	146497	TIGRP2P374453_rs8823989	BICF2G630394300	9	-1
V3271	30	39210734	39318243	-0.911563	107510	146489	146497	TIGRP2P374453_rs8823989	BICF2G630394300	9	-1
V3285	30	39210734	39318243	-0.838354	107510	146489	146497	TIGRP2P374453_rs8823989	BICF2G630394300	9	-1
V3298	30	39210734	39318243	-0.771669	107510	146489	146497	TIGRP2P374453_rs8823989	BICF2G630394300	9	-1
V3252	30	39210734	39335352	-0.810006	124619	146489	146499	TIGRP2P374453_rs8823989	BICF2P1457950	11	-1
V3256	30	39210734	39335352	-0.850727	124619	146489	146499	TIGRP2P374453_rs8823989	BICF2P1457950	11	-1
V3261	30	39210734	39335352	-0.916584	124619	146489	146499	TIGRP2P374453_rs8823989	BICF2P1457950	11	-1
V3267	30	39210734	39335352	-0.770448	124619	146489	146499	TIGRP2P374453_rs8823989	BICF2P1457950	11	-1
V3268	30	39210734	39335352	-0.834888	124619	146489	146499	TIGRP2P374453_rs8823989	BICF2P1457950	11	-1
V3270	30	39210734	39335352	-0.894934	124619	146489	146499	TIGRP2P374453_rs8823989	BICF2P1457950	11	-1
V3275	30	39210734	39335352	-0.929152	124619	146489	146499	TIGRP2P374453_rs8823989	BICF2P1457950	11	-1
V3278	30	39210734	39335352	-0.895567	124619	146489	146499	TIGRP2P374453_rs8823989	BICF2P1457950	11	-1
V3279	30	39210734	39335352	-0.824672	124619	146489	146499	TIGRP2P374453_rs8823989	BICF2P1457950	11	-1
V3280	30	39210734	39335352	-0.963	124619	146489	146499	TIGRP2P374453_rs8823989	BICF2P1457950	11	-1
V3286	30	39210734	39335352	-0.781249	124619	146489	146499	TIGRP2P374453_rs8823989	BICF2P1457950	11	-1
V3291	30	39210734	39335352	-0.738374	124619	146489	146499	TIGRP2P374453_rs8823989	BICF2P1457950	11	-1
V3268	31	4455764	4587534	-0.632966	131771	146926	146937	BICF2S23113505	BICF2G630728239	12	-1
V3286	31	4455764	4587534	-0.492646	131771	146926	146937	BICF2S23113505	BICF2G630728239	12	-1
V3289	31	4568020	4587534	-1.65196	19515	146935	146937	BICF2G630728230	BICF2G630728239	3	-1
V3292	31	4568020	4587534	-1.75017	19515	146935	146937	BICF2G630728230	BICF2G630728239	3	-1
V3254	31	4584803	4600680	-0.968444	15878	146936	146938	BICF2P202524	BICF2G630728269	3	-1
V3256	31	4584803	4600680	-1.77148	15878	146936	146938	BICF2P202524	BICF2G630728269	3	-1
V3291	31	4584803	4600680	-1.74604	15878	146936	146938	BICF2P202524	BICF2G630728269	3	-1
V3296	31	4584803	4600680	-0.983198	15878	146936	146938	BICF2P202524	BICF2G630728269	3	-1
V3280	31	9096732	9125755	-2.24857	29024	147285	147287	BICF2P813196	BICF2G630731494	3	-1
V3267	31	13859193	13875534	-2.073	16342	147605	147607	BICF2P539954	BICF2P20829	3	-1
V3269	31	13859193	13875534	-2.13421	16342	147605	147607	BICF2P539954	BICF2P20829	3	-1
V3271	31	13859193	13875534	-2.26978	16342	147605	147607	BICF2P539954	BICF2P20829	3	-1
V3273	31	13859193	13875534	-1.95112	16342	147605	147607	BICF2P539954	BICF2P20829	3	-1
V3278	31	13859193	13875534	-1.97008	16342	147605	147607	BICF2P539954	BICF2P20829	3	-1
V3289	31	13859193	13875534	-0.838135	16342	147605	147607	BICF2P539954	BICF2P20829	3	-1
V3296	31	13859193	13875534	-1.9381	16342	147605	147607	BICF2P539954	BICF2P20829	3	-1
V3293	31	19842735	19863998	-1.8033	21264	148061	148063	BICF2G630736491	BICF2G630736543	3	-1
V3279	31	19851500	19890244	-2.14604	38745	148062	148064	BICF2G630736506	BICF2G630736558	3	-1
V3252	31	19863998	19901083	-2.07723	37086	148063	148065	BICF2G630736543	BICF2P282442	3	-1
V3254	31	19863998	19901083	-2.22775	37086	148063	148065	BICF2G630736543	BICF2P282442	3	-1
V3280	31	19863998	19901083	-1.99872	37086	148063	148065	BICF2G630736543	BICF2P282442	3	-1
V3285	31	19863998	19901083	-2.07771	37086	148063	148065	BICF2G630736543	BICF2P282442	3	-1
V3286	31	19863998	19901083	-1.85192	37086	148063	148065	BICF2G630736543	BICF2P282442	3	-1
V3287	31	19863998	19901083	-1.80199	37086	148063	148065	BICF2G630736543	BICF2P282442	3	-1
V3289	31	19863998	19901083	-2.0851	37086	148063	148065	BICF2G630736543	BICF2P282442	3	-1
V3278	31	20311186	20342709	-3.47498	31524	148099	148101	BICF2P723138	BICF2P249415	3	-1
V3295	31	20311186	20342709	-3.18192	31524	148099	148101	BICF2P723138	BICF2P249415	3	-1
V3256	31	29932811	29964822	-2.14695	32012	148662	148664	BICF2G630739614	BICF2G630739638	3	-1
V3261	31	29932811	29964822	-2.27788	32012	148662	148664	BICF2G630739614	BICF2G630739638	3	-1
V3268	31	29932811	29964822	-1.97617	32012	148662	148664	BICF2G630739614	BICF2G630739638	3	-1
V3285	31	29932811	29964822	-2.08286	32012	148662	148664	BICF2G630739614	BICF2G630739638	3	-1
V3287	31	29932811	29964822	-2.00079	32012	148662	148664	BICF2G630739614	BICF2G630739638	3	-1
V3289	31	29932811	29964822	-2.18727	32012	148662	148664	BICF2G630739614	BICF2G630739638	3	-1
V3293	31	29932811	29964822	-2.2061	32012	148662	148664	BICF2G630739614	BICF2G630739638	3	-1
V3297	31	29932811	29964822	-2.03851	32012	148662	148664	BICF2G630739614	BICF2G630739638	3	-1
V3289	31	36186102	36192143	-1.68228	6042	149165	149167	BICF2P532339	BICF2S23058254	3	-1
V3254	31	37494003	37518495	-1.19551	24493	149279	149281	BICF2S23739119	BICF2S23140772	3	-1
V3269	31	37494003	37518495	-1.60999	24493	149279	149281	BICF2S23739119	BICF2S23140772	3	-1
V3289	31	37494003	37518495	-1.0045	24493	149279	149281	BICF2S23739119	BICF2S23140772	3	-1
V3278	31	38106423	38148342	-1.17201	41920	149327	149331	BICF2G630743235	BICF2P946213	5	-1
V3254	32	11595412	11643492	-1.24968	48081	150346	150348	BICF2P465852	BICF2P912683	3	-1
V3256	32	11595412	11643492	-1.39843	48081	150346	150348	BICF2P465852	BICF2P912683	3	-1
V3293	32	11595412	11643492	-1.12488	48081	150346	150348	BICF2P465852	BICF2P912683	3	-1
V3297	32	11595412	11643492	-1.16815	48081	150346	150348	BICF2P465852	BICF2P912683	3	-1
V3261	32	11798439	11827824	-1.22853	29386	150359	150361	BICF2S23724355	BICF2P1167619	3	-1
V3271	32	11798439	11827824	-1.20027	29386	150359	150361	BICF2S23724355	BICF2P1167619	3	-1
V3278	32	11798439	11827824	-0.768724	29386	150359	150361	BICF2S23724355	BICF2P1167619	3	-1
V3280	32	11798439	11827824	-0.899675	29386	150359	150361	BICF2S23724355	BICF2P1167619	3	-1
V3285	32	11798439	11827824	-1.10619	29386	150359	150361	BICF2S23724355	BICF2P1167619	3	-1
V3292	32	11798439	11827824	-1.0896	29386	150359	150361	BICF2S23724355	BICF2P1167619	3	-1
V3256	32	14021394	14036862	-0.880128	15469	150535	150537	BICF2P1137141	BICF2G630597311	3	-1
V3268	32	14021394	14036862	-2.1571	15469	150535	150537	BICF2P1137141	BICF2G630597311	3	-1
V3269	32	14021394	14036862	-1.24659	15469	150535	150537	BICF2P1137141	BICF2G630597311	3	-1
V3273	32	14021394	14036862	-2.1642	15469	150535	150537	BICF2P1137141	BICF2G630597311	3	-1
V3275	32	14021394	14036862	-2.24803	15469	150535	150537	BICF2P1137141	BICF2G630597311	3	-1
V3252	32	14036862	14060860	-2.07308	23999	150537	150539	BICF2G630597311	BICF2P876210	3	-1
V3267	32	14036862	14060860	-1.9613	23999	150537	150539	BICF2G630597311	BICF2P876210	3	-1
V3270	32	14036862	14060860	-1.95231	23999	150537	150539	BICF2G630597311	BICF2P876210	3	-1
V3276	32	14036862	14060860	-2.06	23999	150537	150539	BICF2G630597311	BICF2P876210	3	-1
V3279	32	14036862	14060860	-2.01853	23999	150537	150539	BICF2G630597311	BICF2P876210	3	-1
V3286	32	14036862	14060860	-1.82863	23999	150537	150539	BICF2G630597311	BICF2P876210	3	-1
V3289	32	14036862	14060860	-2.10363	23999	150537	150539	BICF2G630597311	BICF2P876210	3	-1
V3298	32	14036862	14060860	-1.85959	23999	150537	150539	BICF2G630597311	BICF2P876210	3	-1
V3285	32	20373311	20389394	-0.688516	16084	151033	151035	BICF2G630592247	BICF2G630592216	3	-1
V3287	32	22826013	22979043	-0.344165	153031	151237	151250	BICF2S22938412	BICF2P1295245	14	-1
V3254	32	23242154	23267431	-1.65952	25278	151271	151273	BICF2G630589392	BICF2G630589323	3	-1
V3292	32	27923713	27969250	-0.861133	45538	151607	151609	BICF2P758687	BICF2P1145360	3	-1
V3293	32	31815422	31835222	-1.8086	19801	151881	151883	BICF2S2372451	BICF2P1350493	3	-1
V3256	32	32539898	32564783	-0.879222	24886	151931	151934	BICF2P1022234	BICF2P1373860	4	-1
V3278	32	32539898	32564783	-0.775279	24886	151931	151934	BICF2P1022234	BICF2P1373860	4	-1
V3280	32	32539898	32564783	-0.878591	24886	151931	151934	BICF2P1022234	BICF2P1373860	4	-1
V3296	32	32539898	32564783	-0.932721	24886	151931	151934	BICF2P1022234	BICF2P1373860	4	-1
V3252	32	32553886	32578670	-1.08468	24785	151933	151935	BICF2S23153552	BICF2P623361	3	-1
V3287	32	33502707	33533750	-0.709733	31044	152006	152008	BICF2S23519683	BICF2P1171925	3	-1
V3254	33	430153	478014	-0.821253	47862	152386	152388	TIGRP2P385193_rs8835550	BICF2P381811	3	-1
V3261	33	430153	478014	-0.906473	47862	152386	152388	TIGRP2P385193_rs8835550	BICF2P381811	3	-1
V3267	33	430153	478014	-0.883162	47862	152386	152388	TIGRP2P385193_rs8835550	BICF2P381811	3	-1
V3268	33	430153	478014	-0.818936	47862	152386	152388	TIGRP2P385193_rs8835550	BICF2P381811	3	-1
V3271	33	430153	478014	-1.01556	47862	152386	152388	TIGRP2P385193_rs8835550	BICF2P381811	3	-1
V3273	33	430153	478014	-0.910062	47862	152386	152388	TIGRP2P385193_rs8835550	BICF2P381811	3	-1
V3278	33	430153	478014	-0.870751	47862	152386	152388	TIGRP2P385193_rs8835550	BICF2P381811	3	-1
V3279	33	430153	478014	-0.803241	47862	152386	152388	TIGRP2P385193_rs8835550	BICF2P381811	3	-1
V3280	33	430153	478014	-0.867076	47862	152386	152388	TIGRP2P385193_rs8835550	BICF2P381811	3	-1
V3286	33	430153	478014	-0.760466	47862	152386	152388	TIGRP2P385193_rs8835550	BICF2P381811	3	-1
V3287	33	430153	478014	-0.67462	47862	152386	152388	TIGRP2P385193_rs8835550	BICF2P381811	3	-1
V3298	33	430153	478014	-0.77237	47862	152386	152388	TIGRP2P385193_rs8835550	BICF2P381811	3	-1
V3289	33	447033	497552	-0.769473	50520	152387	152389	BICF2P704994	BICF2S23628331	3	-1
V3280	33	4974519	4989045	-0.82791	14527	152701	152704	BICF2P993800	BICF2P968950	4	-1
V3261	33	9622836	9647717	-0.697694	24882	153069	153071	BICF2G630248894	BICF2G630248923	3	-1
V3273	33	13244798	13273198	-0.805809	28401	153362	153364	BICF2S23161576	TIGRP2P386799_rs8705062	3	-1
V3276	33	13244798	13273198	-0.687836	28401	153362	153364	BICF2S23161576	TIGRP2P386799_rs8705062	3	-1
V3286	33	13244798	13273198	-0.701323	28401	153362	153364	BICF2S23161576	TIGRP2P386799_rs8705062	3	-1
V3261	33	13244798	13279503	-0.714402	34706	153362	153365	BICF2S23161576	BICF2P459348	4	-1
V3287	33	13244798	13279503	-0.531884	34706	153362	153365	BICF2S23161576	BICF2P459348	4	-1
V3261	33	14730763	14781549	-0.90822	50787	153474	153476	BICF2P733449	BICF2S23418138	3	-1
V3276	33	14730763	14781549	-0.717216	50787	153474	153476	BICF2P733449	BICF2S23418138	3	-1
V3278	33	14730763	14781549	-0.803815	50787	153474	153476	BICF2P733449	BICF2S23418138	3	-1
V3287	33	14730763	14781549	-0.720627	50787	153474	153476	BICF2P733449	BICF2S23418138	3	-1
V3289	33	14730763	14781549	-0.759411	50787	153474	153476	BICF2P733449	BICF2S23418138	3	-1
V3268	33	17234004	17258794	-1.95317	24791	153683	153685	BICF2P636599	BICF2P1403856	3	-1
V3291	33	17234004	17258794	-1.7688	24791	153683	153685	BICF2P636599	BICF2P1403856	3	-1
V3254	33	23063120	23077316	-1.89944	14197	154150	154152	TIGRP2P389194_rs8501234	TIGRP2P389199_rs9108999	3	-1
V3271	33	23196436	23215832	-1.87417	19397	154161	154163	BICF2P956088	BICF2P471677	3	-1
V3276	33	23196436	23215832	-0.713707	19397	154161	154163	BICF2P956088	BICF2P471677	3	-1
V3286	33	23196436	23215832	-0.67005	19397	154161	154163	BICF2P956088	BICF2P471677	3	-1
V3287	33	23196436	23215832	-0.66578	19397	154161	154163	BICF2P956088	BICF2P471677	3	-1
V3289	33	23196436	23215832	-0.700596	19397	154161	154163	BICF2P956088	BICF2P471677	3	-1
V3295	33	23196436	23215832	-1.80807	19397	154161	154163	BICF2P956088	BICF2P471677	3	-1
V3296	33	23196436	23215832	-1.8023	19397	154161	154163	BICF2P956088	BICF2P471677	3	-1
V3297	33	23196436	23215832	-1.87427	19397	154161	154163	BICF2P956088	BICF2P471677	3	-1
V3261	33	27796748	27804594	-0.681904	7847	154511	154513	BICF2P213946	TIGRP2P390256_rs8603963	3	-1
V3280	33	29945502	29994239	-0.768768	48738	154679	154683	BICF2G63075296	BICF2P1375170	5	-1
V3261	33	29970487	29994239	-1.09041	23753	154681	154683	BICF2G63075281	BICF2P1375170	3	-1
V3267	33	29983369	30018718	-1.02729	35350	154682	154684	BICF2S22957196	BICF2P292226	3	-1
V3268	33	29983369	30018718	-1.0441	35350	154682	154684	BICF2S22957196	BICF2P292226	3	-1
V3269	33	29983369	30018718	-1.03606	35350	154682	154684	BICF2S22957196	BICF2P292226	3	-1
V3271	33	29983369	30018718	-1.00099	35350	154682	154684	BICF2S22957196	BICF2P292226	3	-1
V3273	33	29983369	30018718	-0.919486	35350	154682	154684	BICF2S22957196	BICF2P292226	3	-1
V3278	33	29983369	30018718	-0.937208	35350	154682	154684	BICF2S22957196	BICF2P292226	3	-1
V3279	33	29983369	30018718	-1.03375	35350	154682	154684	BICF2S22957196	BICF2P292226	3	-1
V3293	33	29983369	30018718	-1.00729	35350	154682	154684	BICF2S22957196	BICF2P292226	3	-1
V3298	33	29983369	30018718	-0.847598	35350	154682	154684	BICF2S22957196	BICF2P292226	3	-1
V3280	33	30018718	30267845	0.153279	249128	154684	154704	BICF2P292226	BICF2G63075223	21	1
V3280	33	30277145	30504917	-0.202577	227773	154705	154726	BICF2P885780	BICF2P1393973	22	-1
V3280	33	30516193	30712641	0.228979	196449	154727	154743	BICF2P1036863	BICF2G63074774	17	1
V3261	33	31131179	31155541	-0.789313	24363	154777	154780	BICF2S22924987	BICF2P1435215	4	-1
V3256	34	5219073	5261972	-0.642121	42900	155232	155234	BICF2P89279	BICF2P1305476	3	-1
V3280	34	5219073	5261972	-0.634011	42900	155232	155234	BICF2P89279	BICF2P1305476	3	-1
V3252	34	10919658	10951485	-0.583654	31828	155699	155702	BICF2P818163	BICF2S23356430	4	-1
V3254	34	10919658	10951485	-0.598694	31828	155699	155702	BICF2P818163	BICF2S23356430	4	-1
V3276	34	10919658	10951485	-0.539033	31828	155699	155702	BICF2P818163	BICF2S23356430	4	-1
V3297	34	10919658	10951485	-0.607071	31828	155699	155702	BICF2P818163	BICF2S23356430	4	-1
V3298	34	10919658	10951485	-0.620474	31828	155699	155702	BICF2P818163	BICF2S23356430	4	-1
V3289	34	10933619	10956871	-0.687772	23253	155701	155703	BICF2P1145052	TIGRP2P394195_rs8645693	3	-1
V3252	34	19351624	19376939	-0.542715	25316	156322	156324	TIGRP2P395933_rs8532189	TIGRP2P395939_rs8905387	3	-1
V3256	34	19351624	19376939	-0.577055	25316	156322	156324	TIGRP2P395933_rs8532189	TIGRP2P395939_rs8905387	3	-1
V3271	34	19351624	19376939	-0.870987	25316	156322	156324	TIGRP2P395933_rs8532189	TIGRP2P395939_rs8905387	3	-1
V3280	34	19351624	19376939	-0.622975	25316	156322	156324	TIGRP2P395933_rs8532189	TIGRP2P395939_rs8905387	3	-1
V3285	34	19351624	19376939	-0.701706	25316	156322	156324	TIGRP2P395933_rs8532189	TIGRP2P395939_rs8905387	3	-1
V3286	34	19351624	19376939	-0.813135	25316	156322	156324	TIGRP2P395933_rs8532189	TIGRP2P395939_rs8905387	3	-1
V3287	34	19351624	19376939	-0.663407	25316	156322	156324	TIGRP2P395933_rs8532189	TIGRP2P395939_rs8905387	3	-1
V3292	34	19351624	19376939	-0.825419	25316	156322	156324	TIGRP2P395933_rs8532189	TIGRP2P395939_rs8905387	3	-1
V3293	34	19351624	19376939	-0.826134	25316	156322	156324	TIGRP2P395933_rs8532189	TIGRP2P395939_rs8905387	3	-1
V3297	34	19351624	19376939	-0.549447	25316	156322	156324	TIGRP2P395933_rs8532189	TIGRP2P395939_rs8905387	3	-1
V3252	34	24376841	24395399	-0.890769	18559	156727	156729	BICF2P1116714	BICF2G630460717	3	-1
V3254	34	24376841	24395399	-0.623191	18559	156727	156729	BICF2P1116714	BICF2G630460717	3	-1
V3261	34	24376841	24395399	-0.962818	18559	156727	156729	BICF2P1116714	BICF2G630460717	3	-1
V3267	34	24376841	24395399	-0.994015	18559	156727	156729	BICF2P1116714	BICF2G630460717	3	-1
V3268	34	24376841	24395399	-0.923307	18559	156727	156729	BICF2P1116714	BICF2G630460717	3	-1
V3269	34	24376841	24395399	-1.0245	18559	156727	156729	BICF2P1116714	BICF2G630460717	3	-1
V3270	34	24376841	24395399	-1.00263	18559	156727	156729	BICF2P1116714	BICF2G630460717	3	-1
V3271	34	24376841	24395399	-1.889	18559	156727	156729	BICF2P1116714	BICF2G630460717	3	-1
V3275	34	24376841	24395399	-0.997815	18559	156727	156729	BICF2P1116714	BICF2G630460717	3	-1
V3276	34	24376841	24395399	-0.866835	18559	156727	156729	BICF2P1116714	BICF2G630460717	3	-1
V3278	34	24376841	24395399	-1.5809	18559	156727	156729	BICF2P1116714	BICF2G630460717	3	-1
V3279	34	24376841	24395399	-0.837208	18559	156727	156729	BICF2P1116714	BICF2G630460717	3	-1
V3280	34	24376841	24395399	-0.907436	18559	156727	156729	BICF2P1116714	BICF2G630460717	3	-1
V3285	34	24376841	24395399	-0.797672	18559	156727	156729	BICF2P1116714	BICF2G630460717	3	-1
V3286	34	24376841	24395399	-0.881198	18559	156727	156729	BICF2P1116714	BICF2G630460717	3	-1
V3292	34	24376841	24395399	-1.42374	18559	156727	156729	BICF2P1116714	BICF2G630460717	3	-1
V3293	34	24376841	24395399	-0.897493	18559	156727	156729	BICF2P1116714	BICF2G630460717	3	-1
V3296	34	24376841	24395399	-1.5524	18559	156727	156729	BICF2P1116714	BICF2G630460717	3	-1
V3297	34	24376841	24395399	-0.62913	18559	156727	156729	BICF2P1116714	BICF2G630460717	3	-1
V3256	34	24395399	24521721	-0.276833	126323	156729	156741	BICF2G630460717	BICF2G630460591	13	-1
V3286	34	25709906	25748568	-0.562645	38663	156838	156841	BICF2G630459558	BICF2G630459529	4	-1
V3287	34	25709906	25748568	-0.643172	38663	156838	156841	BICF2G630459558	BICF2G630459529	4	-1
V3289	34	25709906	25748568	-0.590021	38663	156838	156841	BICF2G630459558	BICF2G630459529	4	-1
V3298	34	25709906	25748568	-0.788816	38663	156838	156841	BICF2G630459558	BICF2G630459529	4	-1
V3286	34	28259372	28272088	-0.681996	12717	157055	157057	BICF2S23516853	BICF2G630457495	3	-1
V3285	35	16956	882662	-0.158946	865707	158225	158274	BICF2G630767250	BICF2P437429	50	-1
V3256	35	2729952	2750144	-0.713127	20193	158422	158424	BICF2P799995	BICF2P919847	3	-1
V3261	35	5057353	5085638	-0.700062	28286	158617	158619	BICF2P93903	BICF2P455549	3	-1
V3289	35	15092185	15116905	-1.57111	24721	159477	159479	BICF2P1282262	BICF2S2334221	3	-1
V3254	35	15104815	15128602	-0.795239	23788	159478	159480	BICF2P231420	TIGRP2P407591_rs9205515	3	-1
V3269	35	15104815	15128602	-0.705544	23788	159478	159480	BICF2P231420	TIGRP2P407591_rs9205515	3	-1
V3271	35	15104815	15128602	-0.85414	23788	159478	159480	BICF2P231420	TIGRP2P407591_rs9205515	3	-1
V3278	35	15104815	15128602	-0.869652	23788	159478	159480	BICF2P231420	TIGRP2P407591_rs9205515	3	-1
V3279	35	15104815	15128602	-0.707504	23788	159478	159480	BICF2P231420	TIGRP2P407591_rs9205515	3	-1
V3287	35	15104815	15128602	-1.25367	23788	159478	159480	BICF2P231420	TIGRP2P407591_rs9205515	3	-1
V3267	35	15116905	15142486	-0.842239	25582	159479	159481	BICF2S2334221	BICF2P99911	3	-1
V3275	35	15116905	15142486	-0.735976	25582	159479	159481	BICF2S2334221	BICF2P99911	3	-1
V3292	35	15116905	15142486	-0.835634	25582	159479	159481	BICF2S2334221	BICF2P99911	3	-1
V3295	35	15116905	15142486	-0.845427	25582	159479	159481	BICF2S2334221	BICF2P99911	3	-1
V3276	35	19836034	19856279	-0.816157	20246	159862	159864	BICF2G630777015	BICF2G630777040	3	-1
V3256	35	20997613	21018455	-1.54211	20843	159972	159974	TIGRP2P409082_rs9071143	BICF2S2411564	3	-1
V3261	35	20997613	21018455	-1.57767	20843	159972	159974	TIGRP2P409082_rs9071143	BICF2S2411564	3	-1
V3267	35	20997613	21018455	-1.40291	20843	159972	159974	TIGRP2P409082_rs9071143	BICF2S2411564	3	-1
V3270	35	20997613	21018455	-1.51721	20843	159972	159974	TIGRP2P409082_rs9071143	BICF2S2411564	3	-1
V3268	36	13259277	13277021	-2.84816	17745	161401	161403	BICF2P985124	BICF2P368060	3	-1
V3275	36	13277021	13352318	-3.28638	75298	161403	161405	BICF2P368060	BICF2P612985	3	-1
V3286	36	13277021	13352318	-2.44985	75298	161403	161405	BICF2P368060	BICF2P612985	3	-1
V3285	36	13495248	14418529	-0.358521	923282	161414	161483	BICF2P1203537	BICF2P1262089	70	-1
V3295	36	13507218	13554759	-3.34983	47542	161415	161417	BICF2S23516972	BICF2S23525314	3	-1
V3278	36	13554759	14250584	-0.677935	695826	161417	161470	BICF2S23525314	BICF2P1387579	54	-1
V3252	36	13649606	13674565	-4.25278	24960	161425	161427	BICF2P634930	BICF2P283049	3	-1
V3279	36	13649606	13722385	-1.95084	72780	161425	161431	BICF2P634930	BICF2S23116783	7	-1
V3271	36	13674565	13683959	-3.26984	9395	161427	161429	BICF2P283049	BICF2S23637222	3	-1
V3298	36	13674617	13722385	-3.25267	47769	161428	161431	BICF2P283050	BICF2S23116783	4	-1
V3292	36	13722385	13742102	-3.16925	19718	161431	161433	BICF2S23116783	BICF2S23157920	3	-1
V3293	36	13722385	13742102	-2.40049	19718	161431	161433	BICF2S23116783	BICF2S23157920	3	-1
V3289	36	13816407	13841371	-3.75631	24965	161438	161440	BICF2P1227398	BICF2P292691	3	-1
V3267	36	13928937	13959147	-4.04491	30211	161450	161452	BICF2P908736	BICF2P1236668	3	-1
V3296	36	14068609	14095791	-3.14332	27183	161460	161462	TIGRP2P412292_rs8852648	BICF2P684313	3	-1
V3254	36	14236237	14265713	-3.59426	29477	161469	161471	BICF2P424475	BICF2P694847	3	-1
V3261	36	14853547	14879343	-3.43983	25797	161500	161502	TIGRP2P412329_rs9199885	BICF2S2299037	3	-1
V3256	36	14856331	14930340	-2.53633	74010	161501	161503	BICF2P882750	G1480f42S108	3	-1
V3291	36	14879343	15088584	-2.68279	209242	161502	161510	BICF2S2299037	BICF2P540220	9	-1
V3270	36	15043853	15088584	-2.75022	44732	161508	161510	G1482f41S187	BICF2P540220	3	-1
V3287	36	15043853	15088584	-3.73929	44732	161508	161510	G1482f41S187	BICF2P540220	3	-1
V3297	36	15817558	15841038	-3.28392	23481	161553	161555	BICF2P742183	BICF2P1188319	3	-1
V3273	36	15936857	15968970	-5.78401	32114	161561	161563	BICF2P17463	BICF2S23043402	3	-1
V3280	36	16035240	16058467	-2.84818	23228	161570	161572	BICF2P768702	BICF2P1102968	3	-1
V3269	36	16195586	16226274	-3.86976	30689	161582	161584	BICF2S23746958	BICF2P1166863	3	-1
V3276	36	16226274	16250967	-5.36545	24694	161584	161586	BICF2P1166863	TIGRP2P412407_rs8675412	3	-1
V3285	37	2612682	2639070	-0.615514	26389	163024	163026	BICF2P551301	TIGRP2P422955_rs8747959	3	-1
V3261	37	3573102	3612060	-0.984698	38959	163088	163090	BICF2S2325392	BICF2P160493	3	-1
V3292	37	3573102	3612060	-0.92055	38959	163088	163090	BICF2S2325392	BICF2P160493	3	-1
V3254	37	7205225	7234819	-0.804763	29595	163376	163378	BICF2G630126616	BICF2P178734	3	-1
V3261	37	7205225	7234819	-1.23408	29595	163376	163378	BICF2G630126616	BICF2P178734	3	-1
V3267	37	7205225	7234819	-1.13073	29595	163376	163378	BICF2G630126616	BICF2P178734	3	-1
V3269	37	7205225	7234819	-1.27303	29595	163376	163378	BICF2G630126616	BICF2P178734	3	-1
V3270	37	7205225	7234819	-1.20756	29595	163376	163378	BICF2G630126616	BICF2P178734	3	-1
V3275	37	7205225	7234819	-1.3119	29595	163376	163378	BICF2G630126616	BICF2P178734	3	-1
V3279	37	7205225	7234819	-1.27655	29595	163376	163378	BICF2G630126616	BICF2P178734	3	-1
V3285	37	7205225	7234819	-0.893301	29595	163376	163378	BICF2G630126616	BICF2P178734	3	-1
V3287	37	7205225	7234819	-0.78255	29595	163376	163378	BICF2G630126616	BICF2P178734	3	-1
V3292	37	7205225	7234819	-1.20894	29595	163376	163378	BICF2G630126616	BICF2P178734	3	-1
V3293	37	7205225	7234819	-1.13895	29595	163376	163378	BICF2G630126616	BICF2P178734	3	-1
V3295	37	7205225	7234819	-1.07905	29595	163376	163378	BICF2G630126616	BICF2P178734	3	-1
V3298	37	7205225	7234819	-1.01466	29595	163376	163378	BICF2G630126616	BICF2P178734	3	-1
V3252	37	7215771	7245324	-0.927685	29554	163377	163379	BICF2P1413901	BICF2S23714220	3	-1
V3256	37	7215771	7245324	-0.654375	29554	163377	163379	BICF2P1413901	BICF2S23714220	3	-1
V3273	37	7215771	7245324	-1.14138	29554	163377	163379	BICF2P1413901	BICF2S23714220	3	-1
V3276	37	7215771	7245324	-0.744851	29554	163377	163379	BICF2P1413901	BICF2S23714220	3	-1
V3278	37	7215771	7245324	-0.843225	29554	163377	163379	BICF2P1413901	BICF2S23714220	3	-1
V3286	37	7215771	7245324	-0.974831	29554	163377	163379	BICF2P1413901	BICF2S23714220	3	-1
V3289	37	7215771	7245324	-0.782272	29554	163377	163379	BICF2P1413901	BICF2S23714220	3	-1
V3291	37	7215771	7245324	-0.807153	29554	163377	163379	BICF2P1413901	BICF2S23714220	3	-1
V3297	37	7215771	7245324	-0.987582	29554	163377	163379	BICF2P1413901	BICF2S23714220	3	-1
V3280	37	13978983	14008108	-1.3683	29126	163892	163894	TIGRP2P418977_rs8921530	BICF2P1194216	3	-1
V3285	37	13978983	14008108	-1.36549	29126	163892	163894	TIGRP2P418977_rs8921530	BICF2P1194216	3	-1
V3287	37	13978983	14008108	-0.591734	29126	163892	163894	TIGRP2P418977_rs8921530	BICF2P1194216	3	-1
V3254	37	17635716	17654795	-0.703743	19080	164170	164172	BICF2P1155921	BICF2P1356415	3	-1
V3256	37	17635716	17654795	-0.68055	19080	164170	164172	BICF2P1155921	BICF2P1356415	3	-1
V3276	37	17635716	17654795	-0.632048	19080	164170	164172	BICF2P1155921	BICF2P1356415	3	-1
V3289	37	17635716	17654795	-1.18348	19080	164170	164172	BICF2P1155921	BICF2P1356415	3	-1
V3292	37	17635716	17654795	-1.17463	19080	164170	164172	BICF2P1155921	BICF2P1356415	3	-1
V3296	37	17635716	17654795	-1.22505	19080	164170	164172	BICF2P1155921	BICF2P1356415	3	-1
V3252	37	19988185	20016129	-0.562026	27945	164356	164358	BICF2S23315345	BICF2P1162170	3	-1
V3267	37	23295941	23323519	-0.966861	27579	164617	164619	BICF2G630128755	BICF2P1066853	3	-1
V3285	37	23295941	23323519	-0.629575	27579	164617	164619	BICF2G630128755	BICF2P1066853	3	-1
V3287	37	23295941	23323519	-0.697035	27579	164617	164619	BICF2G630128755	BICF2P1066853	3	-1
V3289	37	23295941	23323519	-0.735941	27579	164617	164619	BICF2G630128755	BICF2P1066853	3	-1
V3298	37	23295941	23323519	-0.72779	27579	164617	164619	BICF2G630128755	BICF2P1066853	3	-1
V3254	37	23301205	23333736	-0.716555	32532	164618	164620	BICF2G630128762	BICF2G630128786	3	-1
V3256	37	23301205	23333736	-0.7227	32532	164618	164620	BICF2G630128762	BICF2G630128786	3	-1
V3280	37	23301205	23333736	-0.889883	32532	164618	164620	BICF2G630128762	BICF2G630128786	3	-1
V3295	37	23301205	23333736	-0.94224	32532	164618	164620	BICF2G630128762	BICF2G630128786	3	-1
V3252	37	27558094	27578421	-1.68522	20328	164967	164969	TIGRP2P422209_rs8949417	BICF2G630132928	3	-1
V3296	37	27558094	27578421	-1.61556	20328	164967	164969	TIGRP2P422209_rs8949417	BICF2G630132928	3	-1
V3280	37	30058014	30112232	-0.513974	54219	165178	165183	BICF2G630135358	BICF2P640682	6	-1
V3254	37	30065232	30112232	-0.506711	47001	165179	165183	TIGRP2P422608_rs8924214	BICF2P640682	5	-1
V3256	37	30065232	30112232	-0.490189	47001	165179	165183	TIGRP2P422608_rs8924214	BICF2P640682	5	-1
V3287	38	4831886	4885582	-0.610816	53697	165588	165591	BICF2S2293688	BICF2S23237038	4	-1
V3293	38	4831886	4885582	-0.818965	53697	165588	165591	BICF2S2293688	BICF2S23237038	4	-1
V3292	38	4831886	4889417	-0.699836	57532	165588	165592	BICF2S2293688	BICF2S23237658	5	-1
V3273	38	13775640	13790665	-1.67596	15026	166291	166293	BICF2G63073656	BICF2G63073617	3	-1
V3261	38	13898887	13925952	-2.32605	27066	166304	166306	BICF2P1077138	BICF2G63073444	3	-1
V3276	38	13898887	13925952	-1.99112	27066	166304	166306	BICF2P1077138	BICF2G63073444	3	-1
V3286	38	13898887	13925952	-1.93073	27066	166304	166306	BICF2P1077138	BICF2G63073444	3	-1
V3273	38	23485891	23893119	-0.27215	407229	167156	167183	BICF2G63065778	BICF2G63065639	28	-1
V3292	38	23485891	23893119	-0.291254	407229	167156	167183	BICF2G63065778	BICF2G63065639	28	-1
V3278	38	23495150	23893119	-0.260941	397970	167157	167183	TIGRP2P424744_rs8768229	BICF2G63065639	27	-1
V3271	38	23525635	23893119	-0.29433	367485	167159	167183	BICF2P885495	BICF2G63065639	25	-1
V3279	38	23525635	23893119	-0.265756	367485	167159	167183	BICF2P885495	BICF2G63065639	25	-1
V3295	38	23525635	23893119	-0.242996	367485	167159	167183	BICF2P885495	BICF2G63065639	25	-1
V3252	38	23537427	23705593	-0.646515	168167	167160	167168	TIGRP2P424718_rs9249342	BICF2P6587	9	-1
V3293	38	23537427	23893119	-0.31128	355693	167160	167183	TIGRP2P424718_rs9249342	BICF2G63065639	24	-1

## Sheet: CNVR_SVS
Chromosome Name	Start Position	End Position	Segment Mean	Length (bp)	Start Index	End Index	Start Marker	End Marker	# Markers	Discrete Seg	Frequency
1	11200412	11230533	-4.51468	30122	821	823	BICF2P1120090	BICF2P836101	3	-1	2
2	45707330	45724776	-2.20398	17447	12071	12073	BICF2P625734	BICF2P366680	3	-1	2
2	63082751	63109330	-1.49117	26580	13324	13326	BICF2G630494390	BICF2G630494417	3	-1	4
2	63098773	63124146	-1.28208	25374	13325	13327	BICF2G630494402	BICF2P267812	3	-1	2
2	63109330	63129714	-1.4256	20385	13326	13328	BICF2G630494417	BICF2P868484	3	-1	6
2	84457908	85373067	-0.206227	915160	15007	15070	BICF2S2373519	BICF2P155872	64	-1	13
3	21879130	21932867	-2.62188	53738	16689	16691	BICF2P371492	BICF2P655153	3	-1	12
3	28427635	28454291	-1.54046	26657	17137	17139	BICF2G630704922	BICF2G630704954	3	-1	2
3	31290537	31338689	-1.52189	48153	17344	17346	BICF2G630706786	BICF2G630706900	3	-1	7
3	49308429	49334630	-0.966281	26202	18616	18618	TIGRP2P44301_rs8895405	BICF2P528674	3	-1	6
3	49323200	49339420	-0.831388	16221	18617	18619	BICF2P687613	BICF2P46818	3	-1	9
3	49402651	49432801	-1.54427	30151	18624	18626	BICF2P244978	BICF2S23430879	3	-1	2
3	60133304	60160899	-1.05258	27596	19495	19497	BICF2G630344343	BICF2G630344389	3	-1	5
3	65462673	65484332	-1.48511	21660	19938	19940	BICF2P846585	TIGRP2P49942_rs8703629	3	-1	2
3	68036328	68060655	-1.26248	24328	20163	20165	BICF2G630346944	BICF2G630346971	3	-1	11
3	91380000	91858198	-0.43697	478199	22152	22189	BICF2P1456918	BICF2S22917226	38	-1	22
4	9233605	9259808	-1.21862	26204	22919	22921	BICF2P267164	TIGRP2P58028_rs9197093	3	-1	5
4	19215607	19271931	-1.6392	56325	23650	23652	BICF2P751234	BICF2P362755	3	-1	14
4	20533539	20554700	-3.23335	21162	23720	23722	BICF2P1386178	BICF2P1356480	3	-1	3
4	33937158	34067769	-0.403102	130612	24778	24787	BICF2P199834	BICF2P453069	10	-1	3
4	34013371	34014334	-1.14197	964	24781	24783	BICF2P606679	BICF2P606687	3	-1	4
4	36087780	36109111	-3.34541	21332	24937	24939	BICF2G630167468	TIGRP2P60279_rs9225167	3	-1	2
4	55653099	55683468	-1.82798	30370	26417	26419	BICF2P18092	BICF2P1031315	3	-1	3
4	58838608	58857422	-1.26883	18815	26678	26680	BICF2P649117	BICF2P497342	3	-1	8
4	78775037	78793816	-2.33206	18780	28231	28233	BICF2G630173369	BICF2G630173408	3	-1	15
4	78793816	78837679	-0.748318	43864	28233	28237	BICF2G630173408	BICF2G630173462	5	-1	3
4	79334914	79354704	-0.981685	19791	28277	28279	BICF2G630174056	BICF2G630174072	3	-1	4
4	84464385	84480387	-1.41503	16003	28708	28710	BICF2P950698	BICF2G630178866	3	-1	5
5	289682	310184	-2.65035	20503	29052	29054	BICF2S23145124	BICF2S23656250	3	-1	13
5	8489727	8515268	-2.54198	25542	29694	29696	BICF2P710978	BICF2S23351851	3	-1	10
5	22315998	22355239	-1.51772	39242	30723	30725	BICF2P1361834	BICF2P64139	3	-1	2
5	30417906	30496048	-0.910314	78143	31366	31369	BICF2P1339473	BICF2G630182217	4	-1	3
5	56224866	56660509	-0.380734	435644	33302	33324	BICF2P528235	BICF2S2413175	23	-1	2
5	84658291	84681952	-2.9238	23662	35443	35445	BICF2P1242649	BICF2P1276772	3	-1	3
5	85257977	85281442	-2.33406	23466	35490	35492	BICF2P1219736	BICF2P130700	3	-1	4
5	88867447	88908300	-1.47958	40854	35792	35794	BICF2S23529696	BICF2P798075	3	-1	4
6	48930	780274	-0.208706	731345	35795	35823	BICF2G630807302	BICF2G630807482	29	-1	3
6	9534556	9554081	-1.98591	19526	36513	36515	BICF2P1266835	TIGRP2P78173_rs8572320	3	-1	2
6	13392914	13421628	-1.94908	28715	36820	36822	TIGRP2P79374_rs8668113	TIGRP2P79384_rs9045956	3	-1	5
6	22580400	22610348	-2.94364	29949	37545	37547	BICF2S23510273	BICF2P134996	3	-1	8
6	22589387	22617648	-2.69007	28262	37546	37548	BICF2P524687	BICF2P326907	3	-1	11
6	31526376	31552506	-0.792708	26131	38195	38197	BICF2G630584326	BICF2G630584311	3	-1	3
6	33322866	33348674	-0.712747	25809	38345	38347	BICF2P955217	BICF2P688184	3	-1	3
6	39380812	40232810	-0.33833	851999	38794	38854	BICF2S23028404	TIGRP2P82676_rs8871439	61	-1	2
6	39492415	40261501	-0.342385	769087	38804	38855	BICF2P272231	BICF2S2364709	52	-1	3
6	39583813	40232810	-0.266103	648998	38812	38854	BICF2P460357	TIGRP2P82676_rs8871439	43	-1	2
6	46477607	46501950	-2.16351	24344	39319	39321	BICF2G630580026	BICF2G630580024	3	-1	16
6	46488810	46521359	-2.15551	32550	39320	39322	TIGRP2P84098_rs8763809	BICF2P233539	3	-1	5
6	65496597	65523436	-1.64639	26840	40811	40813	BICF2G630572729	BICF2P809655	3	-1	2
6	75519453	75543492	-2.6292	24040	41629	41631	BICF2P232749	BICF2P1087067	3	-1	5
7	416	961257	-0.282296	960842	41804	41865	BICF2S2336345	BICF2P6113	62	-1	19
7	836217	871741	-1.11257	35525	41854	41857	BICF2P607865	BICF2P501390	4	-1	2
7	10635348	10676430	-1.61578	41083	42585	42587	BICF2P689636	BICF2S23351877	3	-1	3
7	30263185	30289697	-2.14515	26513	44081	44083	BICF2S23424917	BICF2G630555972	3	-1	2
7	43564463	43574075	-1.91565	9613	45063	45065	BICF2P403596	BICF2P322957	3	-1	5
7	45464549	45495031	-2.08028	30483	45218	45220	BICF2P262369	BICF2P378560	3	-1	2
7	57076741	57105824	-1.60696	29084	46125	46128	BICF2P256492	BICF2G630560835	4	-1	2
7	61029355	61046990	-2.30279	17636	46459	46461	BICF2P548704	BICF2G630563327	3	-1	4
7	75374260	75397834	-1.69703	23575	47625	47627	BICF2P646016	BICF2P921780	3	-1	2
8	9287892	9316645	-1.76702	28754	48761	48764	BICF2P453604	TIGRP2P107099_rs8541544	4	-1	4
8	9755675	9842223	-2.28913	86549	48794	48799	BICF2P502010	BICF2P25857	6	-1	3
8	32622155	32651892	-2.23616	29738	50411	50413	BICF2P100704	BICF2P839250	3	-1	7
9	3493	909141	-0.22855	905649	53247	53309	BICF2P309837	TIGRP2P244726_rs8678790	63	-1	2
9	916372	997748	-1.04036	81377	53310	53317	BICF2P801989	TIGRP2P244718_rs8924886	8	-1	2
9	28441048	28455135	-2.10167	14088	55132	55134	BICF2P343539	BICF2P572850	3	-1	3
9	35439263	36278474	-0.258298	839212	55650	55702	BICF2G630836674	TIGRP2P126305_rs8829062	53	-1	2
9	35626085	35673248	-4.4046	47164	55664	55666	BICF2P1422473	BICF2P1147626	3	-1	2
9	36046668	36088008	-3.09321	41341	55689	55691	BICF2G630836889	BICF2G630836919	3	-1	3
9	36308946	36333983	-3.77209	25038	55705	55707	BICF2G630836979	BICF2G630836989	3	-1	13
9	38973520	38988684	-2.79367	15165	55881	55883	BICF2S2335873	BICF2S2376764	3	-1	3
9	48891617	48927437	-1.5051	35821	56625	56627	BICF2S2378118	BICF2S2328598	3	-1	2
9	50999629	51020047	-2.06644	20419	56807	56809	BICF2P770237	BICF2P526893	3	-1	7
10	7705978	7720636	-2.30867	14659	57979	57981	BICF2P1433273	BICF2P330949	3	-1	2
10	16785414	17193557	-0.396157	408144	58609	58637	BICF2P271043	G587f34S290	29	-1	2
10	17213229	17284700	-1.98672	71472	58638	58640	BICF2G630476139	BICF2P376281	3	-1	7
10	17299422	18194980	-0.192093	895559	58641	58714	BICF2G630476142	BICF2G630477022	74	-1	2
10	18198833	18220792	-1.50626	21960	58715	58717	BICF2S23548656	BICF2G630477032	3	-1	2
10	22893499	22917462	-4.67218	23964	59090	59092	BICF2P458474	TIGRP2P138930_rs8593506	3	-1	2
11	1170983	1188042	-0.859921	17060	62670	62672	BICF2S23514671	BICF2S24116836	3	-1	2
11	5031782	5081219	-0.767132	49438	62864	62866	BICF2P969729	BICF2S23037144	3	-1	10
11	22236983	22258742	-0.910806	21760	63880	63882	BICF2P1339679	BICF2G630297140	3	-1	12
11	29524867	29545718	0.658599	20852	64364	64366	TIGRP2P148825_rs9197535	BICF2P867682	3	1	2
11	35650072	35691390	-1.15245	41319	64775	64777	BICF2P1105439	BICF2P317662	3	-1	3
11	39223222	39250114	-1.68827	26893	65011	65013	BICF2P353831	BICF2P496690	3	-1	10
11	39242040	39263174	-0.756572	21135	65012	65014	BICF2P71569	BICF2P923218	3	-1	5
11	45078624	45122774	-0.770866	44151	65438	65440	BICF2P1278043	BICF2P199426	3	-1	3
11	45109264	45139324	-0.582141	30061	65439	65441	BICF2S23650418	BICF2P198758	3	-1	2
11	50357487	50470281	-0.928212	112795	65752	65754	BICF2P297619	BICF2S23158671	3	-1	2
11	66481133	66508356	-0.74394	27224	66999	67001	TIGRP2P152207_rs8649738	BICF2S23023483	3	-1	4
11	67919301	67954720	-0.611414	35420	67105	67107	BICF2S23538318	BICF2S22944567	3	-1	3
12	4411692	4430094	-1.10565	18403	68007	68009	BICF2P96079	TIGRP2P167894_rs9150645	3	-1	3
12	7549965	7576867	-1.81194	26903	68244	68246	TIGRP2P156095_rs8564987	TIGRP2P156100_rs8987991	3	-1	2
12	13578327	13610726	-1.53476	32400	68731	68733	TIGRP2P157817_rs8713315	BICF2P497920	3	-1	2
12	15662198	15700110	-2.24463	37913	68923	68925	BICF2P326140	BICF2P372848	3	-1	3
12	19086811	19102995	-1.76721	16185	69189	69191	BICF2S23446810	BICF2P818037	3	-1	7
12	20315993	20337721	-1.25005	21729	69297	69299	BICF2P659659	BICF2S23517704	3	-1	3
12	37997412	38020374	0.767785	22963	70552	70554	TIGRP2P163977_rs8758604	BICF2P728193	3	1	4
12	49974806	50016546	-0.625761	41741	71434	71438	BICF2P1506734	BICF2P955614	5	-1	2
12	50390171	50410506	-2.16867	20336	71468	71470	BICF2S237635	BICF2P349222	3	-1	3
12	50393169	50418534	-2.04323	25366	71469	71471	BICF2S23533416	BICF2P434515	3	-1	3
12	57259344	57274600	-2.31645	15257	72011	72013	BICF2P1307064	BICF2G630121296	3	-1	3
12	57274600	57300319	-2.22487	25720	72013	72015	BICF2G630121296	TIGRP2P169512_rs9008435	3	-1	10
12	68490038	68521550	-1.07356	31513	72903	72905	BICF2P715523	BICF2P273290	3	-1	8
12	72024259	72491619	-0.282548	467361	73192	73229	BICF2P64196	TIGRP2P174000_rs8757648	38	-1	5
12	72045149	72268125	-0.590374	222977	73193	73209	TIGRP2P173862_rs8727941	BICF2P402255	17	-1	12
13	35964211	36011431	-1.13508	47221	76162	76168	BICF2G630660140	BICF2P1456803	7	-1	4
13	38350846	38365050	-5.49702	14205	76317	76319	TIGRP2P176690_rs8673809	BICF2P258310	3	-1	2
13	38583430	38589999	-2.58246	6570	76335	76337	BICF2P446760	BICF2P452680	3	-1	2
13	49038696	49075233	-1.89844	36538	77150	77152	TIGRP2P179907_rs9239717	TIGRP2P179961_rs8675528	3	-1	10
13	50442609	50462760	-4.39027	20152	77249	77251	BICF2P872055	BICF2P116436	3	-1	10
14	46484	1000647	-0.268709	954164	78248	78294	BICF2G630707245	BICF2P427413	47	-1	17
14	5073831	5079225	-1.74686	5395	78549	78551	BICF2G630519371	BICF2S2325960	3	-1	9
14	9965529	10027715	-0.67672	62187	78872	78877	BICF2G630520556	BICF2P293316	6	-1	2
14	11169811	11195920	-0.807888	26110	78972	78974	BICF2P1198043	BICF2P1339843	3	-1	2
14	29692877	29714085	-2.17355	21209	80379	80381	BICF2S23344680	BICF2P756924	3	-1	2
14	33133200	33151471	-2.17023	18272	80640	80642	BICF2G630526852	BICF2G630526872	3	-1	2
14	42149087	42173208	-1.72521	24122	81357	81359	BICF2G630530770	BICF2G630530812	3	-1	2
14	42165303	42191677	-1.80245	26375	81358	81360	BICF2S22948731	BICF2G630530825	3	-1	3
15	7966269	7985600	-3.19978	19332	83268	83270	BICF2P283828	BICF2P1444481	3	-1	2
15	7976558	7999544	-3.11595	22987	83269	83271	TIGRP2P195163_rs8889352	BICF2P1018807	3	-1	2
15	8373335	8394903	-4.20556	21569	83298	83300	BICF2G630444299	BICF2G630444284	3	-1	2
15	52481838	52507473	-2.85214	25636	86620	86622	BICF2G630426332	BICF2G630426297	3	-1	2
16	279430	442252	-0.543782	162823	87590	87598	BICF2G630842851	BICF2S23452372	9	-1	2
16	287249	344366	-1.05248	57118	87591	87593	BICF2G630842883	G892f59S180	3	-1	2
16	4344002	4380926	-1.00231	36925	87826	87828	BICF2P1162241	TIGRP2P210860_rs8496715	3	-1	2
16	4344878	4415164	-0.842621	70287	87827	87829	BICF2S23135682	TIGRP2P210862_rs8694220	3	-1	5
16	6304316	6328427	-0.820279	24112	87941	87943	BICF2P1407562	BICF2S23117136	3	-1	2
16	25623393	25639207	-1.98762	15815	89326	89328	BICF2P60110	BICF2S23248096	3	-1	6
16	25639207	25648238	-0.705867	9032	89328	89330	BICF2S23248096	BICF2P812665	3	-1	2
16	30479499	30502988	-1.78744	23490	89698	89700	BICF2G630112511	BICF2G630112540	3	-1	3
16	37458888	37497824	-1.26838	38937	90253	90255	BICF2S2336279	BICF2S22936263	3	-1	2
16	37497824	37511680	-1.19012	13857	90255	90257	BICF2S22936263	BICF2P423853	3	-1	6
17	51048	739345	-0.263716	688298	91960	92010	BICF2P1369289	BICF2P87482	51	-1	11
17	749155	818590	-1.31913	69436	92011	92015	BICF2S2362493	BICF2S23136090	5	-1	5
17	9634130	9663198	-2.79551	29069	92731	92733	BICF2G630221126	BICF2S22926878	3	-1	9
17	21821055	21860819	-1.87936	39765	93659	93661	BICF2P1307982	TIGRP2P228725_rs8527793	3	-1	2
17	21860819	21887297	-1.91614	26479	93661	93663	TIGRP2P228725_rs8527793	BICF2P585519	3	-1	2
17	24179297	24207420	-0.758155	28124	93860	93862	BICF2G630215430	BICF2P914190	3	-1	3
17	31697853	31748212	-2.27112	50360	94434	94438	BICF2G630211349	BICF2G630211301	5	-1	4
17	37575158	37612731	-2.94667	37574	94916	94918	BICF2S23516414	BICF2P440338	3	-1	4
17	39880141	39905486	-0.820636	25346	95097	95099	BICF2S23210041	TIGRP2P231415_rs8979551	3	-1	3
17	44988352	45019248	-1.69169	30897	95503	95505	BICF2G630205561	BICF2G630205527	3	-1	4
17	48545155	48573392	-1.82555	28238	95798	95800	BICF2P122557	BICF2P888516	3	-1	8
18	13680917	13701240	-1.81117	20324	97925	97927	BICF2P1118107	BICF2P892066	3	-1	3
18	25353932	25835512	-0.44482	481581	98771	98809	BICF2P1034359	TIGRP2P246809_rs8956242	39	-1	4
18	25644344	25835512	-0.498791	191169	98793	98809	BICF2P1358625	TIGRP2P246809_rs8956242	17	-1	8
18	28466580	28483370	-2.41421	16791	99020	99022	BICF2P435180	BICF2S22948596	3	-1	3
18	39422566	39441997	-1.61575	19432	99944	99946	BICF2G630695284	BICF2G630695265	3	-1	2
18	44960166	44982705	-1.09024	22540	100335	100337	BICF2G630691338	BICF2P844269	3	-1	7
18	47622091	47637994	-1.79271	15904	100575	100577	BICF2P863660	BICF2P822092	3	-1	2
19	1339011	1371826	-1.21596	32816	101328	101330	BICF2S23231218	BICF2P1141329	3	-1	2
19	7160676	7187666	-1.89663	26991	101734	101736	BICF2P774674	BICF2P588787	3	-1	2
19	10927717	10953217	-1.82533	25501	101996	101998	BICF2P874164	BICF2G63036912	3	-1	3
19	13362597	13389686	-1.35154	27090	102160	102162	BICF2P751884	BICF2G63037793	3	-1	3
19	20027329	20052361	-1.45266	25033	102664	102666	TIGRP2P261565_rs8625027	TIGRP2P261690_rs8564506	3	-1	4
20	42179452	42196795	-1.51498	17344	108553	108555	BICF2P875778	BICF2P927993	3	-1	2
20	47644167	47689970	-1.27489	45804	108961	108963	BICF2P314298	BICF2S23625284	3	-1	3
20	53264834	53285579	-4.68142	20746	109379	109381	BICF2G630446911	BICF2G630446823	3	-1	8
20	53277896	53336682	-4.75591	58787	109380	109382	BICF2G630446837	BICF2G630446820	3	-1	4
21	925434	992193	-1.83908	66760	109813	109815	BICF2S22918145	G1133f50S226	3	-1	2
21	2363572	2407508	-0.695586	43937	109887	109889	BICF2S23330272	BICF2P101663	3	-1	2
21	3729193	3748617	-0.73713	19425	109966	109968	BICF2G630659387	BICF2P163886	3	-1	3
21	17089078	17118327	-1.15173	29250	111008	111010	BICF2G630652299	BICF2S2339062	3	-1	8
21	17118327	17149422	-0.833697	31096	111010	111013	BICF2S2339062	BICF2G630652216	4	-1	2
21	17949933	17994352	-1.24641	44420	111085	111087	BICF2G630651468	BICF2G630651457	3	-1	2
21	25453148	25485652	-1.63585	32505	111671	111673	BICF2G630649224	BICF2P239339	3	-1	3
21	27100586	27121249	-3.22926	20664	111797	111799	BICF2G630648161	TIGRP2P281826_rs8561612	3	-1	11
21	28001896	28025325	-2.58704	23430	111862	111864	BICF2G630645407	BICF2G630645172	3	-1	3
21	35464142	35491568	-0.906604	27427	112436	112438	BICF2P1377107	BICF2S23446204	3	-1	4
21	37103017	37132736	-0.803052	29720	112548	112550	BICF2S2451850	BICF2P866988	3	-1	2
21	44776244	44811506	-1.99738	35263	113164	113166	TIGRP2P287452_rs8734688	BICF2P469034	3	-1	9
22	15010194	15031529	-2.13878	21336	114795	114797	BICF2G630319880	BICF2S23756680	3	-1	11
22	15031529	15057531	-1.80773	26003	114797	114799	BICF2S23756680	BICF2P1037367	3	-1	2
22	17995491	18015306	-2.18944	19816	115027	115029	BICF2S23654013	BICF2G630321511	3	-1	2
22	25057153	25093411	-2.13463	36259	115577	115579	BICF2S23352560	BICF2G630325626	3	-1	2
22	31279193	31316414	-1.35387	37222	116047	116049	BICF2P1467761	BICF2P367494	3	-1	2
22	37620314	37642028	-1.5613	21715	116531	116533	BICF2P234656	BICF2P613165	3	-1	3
22	40237310	40276123	-1.70784	38814	116738	116740	TIGRP2P293657_rs8588741	BICF2P418844	3	-1	3
22	40276123	40315950	-1.70334	39828	116740	116742	BICF2P418844	BICF2P1307547	3	-1	5
22	52977842	53026263	-1.24314	48422	117762	117766	BICF2P558582	BICF2P9087	5	-1	5
23	4080354	4096884	-2.12107	16531	118743	118745	TIGRP2P309780_rs9216837	BICF2P535874	3	-1	3
23	31994075	32018316	-1.64728	24242	121023	121025	BICF2G630373727	BICF2G630373685	3	-1	3
23	35651306	35674044	-1.83109	22739	121282	121284	BICF2S23218301	BICF2G630371909	3	-1	6
23	35674044	35701291	-1.82368	27248	121284	121286	BICF2G630371909	BICF2G630371892	3	-1	11
23	41381599	41400650	-2.33836	19052	121738	121740	BICF2S22933334	BICF2P383035	3	-1	4
23	51871689	52291577	-0.290643	419889	122603	122639	BICF2P373712	BICF2P374432	37	-1	4
23	51906828	52291577	-0.277923	384750	122606	122639	BICF2S23549391	BICF2P374432	34	-1	13
23	52265432	52291577	-1.89473	26146	122637	122639	G1240f12S188	BICF2P374432	3	-1	4
24	32179601	32200587	-0.810143	20987	125197	125199	BICF2P636461	BICF2G630498871	3	-1	2
24	39292205	39306565	-2.23232	14361	125759	125761	TIGRP2P319831_rs8958337	BICF2P156489	3	-1	6
24	39294546	39322997	-2.13686	28452	125760	125762	BICF2P1287999	BICF2P1116741	3	-1	4
24	46471766	46497406	-1.39983	25641	126342	126344	BICF2G630496156	BICF2S23238071	3	-1	4
25	6848719	6881094	-0.758557	32376	126897	126899	BICF2G630470546	BICF2G630470543	3	-1	3
25	11546672	11560384	-3.33204	13713	127275	127277	TIGRP2P324793_rs9205367	BICF2G630468059	3	-1	2
25	25450114	25467242	-1.20139	17129	128335	128337	BICF2G63094772	BICF2G63094787	3	-1	2
25	33212048	33230226	-1.98922	18179	129003	129005	BICF2G630101472	BICF2P599432	3	-1	5
25	37132348	37166654	-2.65274	34307	129347	129349	G1292f1S301	BICF2P263284	3	-1	9
25	41096846	41140495	-2.50737	43650	129679	129681	BICF2P1305599	BICF2P759159	3	-1	2
25	46944406	46981477	-1.00604	37072	130186	130188	BICF2S23125237	BICF2S23240316	3	-1	5
25	47352079	47372977	-2.21623	20899	130220	130222	TIGRP2P333568_rs9165933	BICF2G630159679	3	-1	3
25	48611803	48662322	-0.919662	50520	130331	130336	BICF2P792692	BICF2G630158483	6	-1	11
25	50314369	51088717	-0.598846	774349	130462	130494	TIGRP2P335336_rs9166663	BICF2P506646	33	-1	11
25	50345174	51086372	-0.463261	741199	130464	130493	BICF2G630156379	BICF2P315396	30	-1	2
26	13993470	14002319	-1.61997	8850	131668	131670	BICF2G630803304	BICF2G630803289	3	-1	2
26	16851576	16888919	-1.57543	37344	131913	131915	TIGRP2P338736_rs8965462	BICF2P277389	3	-1	4
26	17473721	17480462	-1.14294	6742	131960	131962	BICF2P1470656	BICF2P480782	3	-1	3
26	29568722	29582533	-1.04338	13812	132754	132756	BICF2P509454	BICF2P1375952	3	-1	2
26	33100880	33132648	-1.93773	31769	133022	133024	BICF2P1031438	BICF2S2316342	3	-1	6
26	34409654	34413826	-1.80443	4173	133135	133137	BICF2P854140	BICF2G630197876	3	-1	2
27	911310	954870	-1.36352	43561	133618	133621	BICF2P582817	BICF2P289821	4	-1	17
27	2231714	2257152	-0.861359	25439	133727	133729	BICF2G630138149	BICF2P125273	3	-1	5
27	2869179	2886074	-0.755502	16896	133789	133791	BICF2G630138664	BICF2G630138678	3	-1	2
27	15335281	15363338	-1.79068	28058	134748	134750	BICF2G630145389	BICF2S23248210	3	-1	3
27	17907955	17929067	-0.848031	21113	134944	134946	BICF2G630147479	BICF2G630147500	3	-1	4
27	17921151	17941754	-3.51579	20604	134945	134947	BICF2G630147492	BICF2G630147514	3	-1	2
27	19678326	19701607	-1.82605	23282	135087	135089	BICF2P376955	TIGRP2P350290_rs8751170	3	-1	2
27	25695551	25753779	-1.96281	58229	135551	135553	TIGRP2P351680_rs8666747	BICF2G630150826	3	-1	5
27	25695551	25810881	-0.774986	115331	135551	135561	TIGRP2P351680_rs8666747	BICF2G630150974	11	-1	8
27	30024327	30063874	-1.6352	39548	135868	135870	BICF2P775823	BICF2S2317625	3	-1	2
27	34434372	34453731	-2.2162	19360	136223	136225	BICF2P794774	BICF2P1268296	3	-1	5
27	35584556	35618891	-2.46561	34336	136299	136301	G1331f26S193	BICF2S22946237	3	-1	2
28	29965471	30007507	-2.24408	42037	139350	139352	BICF2S2456333	BICF2P602157	3	-1	11
28	40299547	41175293	-0.186063	875747	140284	140353	BICF2G630108823	TIGRP2P278766_rs8517909	70	-1	5
29	2117784	2139791	-0.921011	22008	140493	140495	BICF2G630622085	TIGRP2P367609_rs9110851	3	-1	7
29	10359710	10388621	-0.940093	28912	141114	141116	BICF2P403740	BICF2P939990	3	-1	2
29	21319977	21339501	-0.773514	19525	141978	141980	BICF2G630623427	BICF2G630623461	3	-1	6
29	28407024	28428927	-2.12627	21904	142552	142554	BICF2P570175	BICF2G630628206	3	-1	3
29	29518062	29545897	-0.841014	27836	142625	142627	BICF2G630628944	BICF2G630628982	3	-1	3
30	27754272	27774223	-2.31396	19952	145550	145552	BICF2P1183475	BICF2P912260	3	-1	2
30	28031515	28060716	-1.70518	29202	145573	145575	BICF2P1351799	BICF2P931438	3	-1	5
30	28045260	28074620	-1.67498	29361	145574	145576	BICF2S23351380	BICF2S23014531	3	-1	4
30	28060716	28082737	-1.59259	22022	145575	145577	BICF2P931438	BICF2P700590	3	-1	6
30	32564862	32586719	-2.59327	21858	145931	145933	BICF2G630399269	BICF2G630399218	3	-1	4
30	38564729	38810000	-0.326256	245272	146431	146453	BICF2P179456	BICF2G630394836	23	-1	2
30	39210734	39318243	-0.894663	107510	146489	146497	TIGRP2P374453_rs8823989	BICF2G630394300	9	-1	17
31	4568020	4587534	-1.65196	19515	146935	146937	BICF2G630728230	BICF2G630728239	3	-1	4
31	4584803	4600680	-0.968444	15878	146936	146938	BICF2P202524	BICF2G630728269	3	-1	4
31	13859193	13875534	-2.073	16342	147605	147607	BICF2P539954	BICF2P20829	3	-1	7
31	19863998	19901083	-2.07723	37086	148063	148065	BICF2G630736543	BICF2P282442	3	-1	7
31	20311186	20342709	-3.47498	31524	148099	148101	BICF2P723138	BICF2P249415	3	-1	2
31	29932811	29964822	-2.14695	32012	148662	148664	BICF2G630739614	BICF2G630739638	3	-1	8
31	37494003	37518495	-1.19551	24493	149279	149281	BICF2S23739119	BICF2S23140772	3	-1	3
32	11595412	11643492	-1.24968	48081	150346	150348	BICF2P465852	BICF2P912683	3	-1	4
32	11798439	11827824	-1.22853	29386	150359	150361	BICF2S23724355	BICF2P1167619	3	-1	6
32	14021394	14036862	-0.880128	15469	150535	150537	BICF2P1137141	BICF2G630597311	3	-1	5
32	14036862	14060860	-2.07308	23999	150537	150539	BICF2G630597311	BICF2P876210	3	-1	8
32	32539898	32564783	-0.879222	24886	151931	151934	BICF2P1022234	BICF2P1373860	4	-1	4
33	430153	478014	-0.821253	47862	152386	152388	TIGRP2P385193_rs8835550	BICF2P381811	3	-1	12
33	13244798	13273198	-0.805809	28401	153362	153364	BICF2S23161576	TIGRP2P386799_rs8705062	3	-1	5
33	14730763	14781549	-0.90822	50787	153474	153476	BICF2P733449	BICF2S23418138	3	-1	5
33	17234004	17258794	-1.95317	24791	153683	153685	BICF2P636599	BICF2P1403856	3	-1	2
33	23196436	23215832	-1.87417	19397	154161	154163	BICF2P956088	BICF2P471677	3	-1	8
33	29970487	29994239	-1.09041	23753	154681	154683	BICF2G63075281	BICF2P1375170	3	-1	2
33	29983369	30018718	-1.02729	35350	154682	154684	BICF2S22957196	BICF2P292226	3	-1	9
34	5219073	5261972	-0.642121	42900	155232	155234	BICF2P89279	BICF2P1305476	3	-1	2
34	10919658	10951485	-0.583654	31828	155699	155702	BICF2P818163	BICF2S23356430	4	-1	5
34	19351624	19376939	-0.542715	25316	156322	156324	TIGRP2P395933_rs8532189	TIGRP2P395939_rs8905387	3	-1	10
34	24376841	24395399	-0.890769	18559	156727	156729	BICF2P1116714	BICF2G630460717	3	-1	19
34	25709906	25748568	-0.562645	38663	156838	156841	BICF2G630459558	BICF2G630459529	4	-1	4
35	15104815	15128602	-0.795239	23788	159478	159480	BICF2P231420	TIGRP2P407591_rs9205515	3	-1	6
35	15116905	15142486	-0.842239	25582	159479	159481	BICF2S2334221	BICF2P99911	3	-1	4
35	20997613	21018455	-1.54211	20843	159972	159974	TIGRP2P409082_rs9071143	BICF2S2411564	3	-1	4
36	13277021	13352318	-3.28638	75298	161403	161405	BICF2P368060	BICF2P612985	3	-1	2
36	13649606	13674565	-4.25278	24960	161425	161427	BICF2P634930	BICF2P283049	3	-1	2
36	13722385	13742102	-3.16925	19718	161431	161433	BICF2S23116783	BICF2S23157920	3	-1	2
36	15043853	15088584	-2.75022	44732	161508	161510	G1482f41S187	BICF2P540220	3	-1	3
37	3573102	3612060	-0.984698	38959	163088	163090	BICF2S2325392	BICF2P160493	3	-1	2
37	7205225	7234819	-0.804763	29595	163376	163378	BICF2G630126616	BICF2P178734	3	-1	13
37	7215771	7245324	-0.927685	29554	163377	163379	BICF2P1413901	BICF2S23714220	3	-1	9
37	13978983	14008108	-1.3683	29126	163892	163894	TIGRP2P418977_rs8921530	BICF2P1194216	3	-1	3
37	17635716	17654795	-0.703743	19080	164170	164172	BICF2P1155921	BICF2P1356415	3	-1	6
37	23295941	23323519	-0.966861	27579	164617	164619	BICF2G630128755	BICF2P1066853	3	-1	5
37	23301205	23333736	-0.716555	32532	164618	164620	BICF2G630128762	BICF2G630128786	3	-1	4
37	27558094	27578421	-1.68522	20328	164967	164969	TIGRP2P422209_rs8949417	BICF2G630132928	3	-1	2
37	30065232	30112232	-0.506711	47001	165179	165183	TIGRP2P422608_rs8924214	BICF2P640682	5	-1	3
38	4831886	4885582	-0.610816	53697	165588	165591	BICF2S2293688	BICF2S23237038	4	-1	3
38	13898887	13925952	-2.32605	27066	166304	166306	BICF2P1077138	BICF2G63073444	3	-1	3
38	23485891	23893119	-0.27215	407229	167156	167183	BICF2G63065778	BICF2G63065639	28	-1	2
38	23525635	23893119	-0.29433	367485	167159	167183	BICF2P885495	BICF2G63065639	25	-1	4
38	23537427	23705593	-0.646515	168167	167160	167168	TIGRP2P424718_rs9249342	BICF2P6587	9	-1	2

## Sheet: CNVR_Penn_vs_SVS
Chromosomes	Start Position	End Position	Length (bp)	Start Marker	End Marker	Discrete	State	Freq_SVS	Freq_PennCNV	Genes
chr1	11200412	11215077	14666	BICF2P1120090	BICF2P355794	Loss	loss	2	2	LOC102154255
chr2	85014043	85062551	48509	BICF2P619735	BICF2S23645363	Loss	loss	13	16
chr3	91380000	91530812	150813	BICF2P1456918	BICF2S23326367	Loss	loss	22	10	CTBP1, SPON2, LOC100682613, TMED11, RNF212, FGFRL1, IDUA, LOC111095326, SLC26A1
chr4	33991898	34067769	75872	BICF2P1323528	BICF2P453069	Loss	loss	3	4	GRID1
chr6	39482383	39941098	458716	TIGRP2P82574_rs8910870	BICF2S23232169	Loss	loss	7	2	LOC100049001, CACNA1H, LOC111096331, LOC106558921, LOC111096332, LOC490081, SSTR5, SOX8, LOC111096333, LMF1, MIR8877, LOC111096334, GNG13, CHTF18, RPUSD1, MSLNL, LOC611363, LOC111096335, NARFL, LOC106558944, HAGHL, LOC102155632, CCDC78, FAM173A, METRN, FBXL16, WDR24, JMJD8, STUB1, RHBDL1, RHOT2, WDR90, MCRIP2, TRNAG-CCC, METTL26, WFIKKN1, RAB40C
chr6	40137436	40261501	124066	BICF2P475423	BICF2S2364709	Loss	loss	7	15
chr7	38374	158544	120171	BICF2P357935	BICF2P1285992	Loss	loss	19	2	MYBPH, ADORA1, LOC102152802, LOC106558980, MYOG, PPFIA4
chr7	55444	233188	177745	BICF2G630465156	BICF2P474134	Loss	loss	19	2	ADORA1, LOC102152802, LOC106558980, MYOG, PPFIA4, LOC111096576, TMEM183A, LOC100682872, LOC111096575, LOC102151417, CYB5R1
chr7	790325	836217	45893	BICF2S23621822	BICF2P607865	Loss	loss	19	6	LGR6
chr7	846445	871741	25297	BICF2P142496	BICF2P501390	Loss	loss	19	6	LOC607201, PTPN7
chr9	3493	351734	348242	BICF2P309837	TIGRP2P244817_rs8572936	Loss	loss	2	2	LOC102152928, CD7, CSNK1D, SLC16A3, CCDC57, FASN, DUS1L, GPS1, RFNG, LOC102154270, LOC607806, DCXR, RAC3, LRRC45, ASPSCR1, NOTUM
chr9	615993	795784	179792	BICF2P1272565	BICF2P1188322	Loss	loss	2	2	FSCN2, LOC111097269, LOC102157223, ACTG1, BAHCC1, LOC102151164
chr9	660066	909141	249076	BICF2S23232063	TIGRP2P244726_rs8678790	Loss	loss	2	2	BAHCC1, LOC102151164, SLC38A10, NDUFAF8, TEPSIN, CEP131,
chr9	916372	997748	81377	BICF2P801989	TIGRP2P244718_rs8924886	Loss	loss	2	4	AATK, MIR338, BAIAP2
chr9	36229022	36278474	49453	BICF2G630836951	TIGRP2P126305_rs8829062	Loss	loss	2	5
chr9	36308946	36333983	25038	BICF2G630836979	BICF2G630836989	Loss	loss	13	11	USP32, LOC111097513, CA4, TRNAK-CUU
chr10	16943758	17055639	111882	BICF2P1204119	BICF2P804757	Loss	Loss	2	9	DENND6B, PLXNB2, MAPK11, MAPK12, HDAC10, TUBGCP6, LOC111097612, SELENOO, LOC607055, TRABD, PANX2,
chr10	17172641	17284700	112060	BICF2P647101	BICF2P376281	Loss	Loss	9	21	TTLL8, IL17REL, LOC111097613, PIM3
chr10	17744636	17796981	52346	BICF2G630476696	BICF2G630476786	Loss	Loss	2	2
chr10	18100399	18220792	120394	BICF2P212964	BICF2G630477032	Loss	Loss	4	7	FAM19A5
chr12	72045149	72268125	222977	TIGRP2P173862_rs8727941	BICF2P402255	Loss	Loss	17	8	LOC111098413, LOC111098414, DLL1
chr12	72460835	72491619	30785	BICF2S22924927	TIGRP2P174000_rs8757648	Loss	Gain	5	2	TBP, PDCD2
chr13	38350846	38365050	14205	TIGRP2P176690_rs8673809	BICF2P258310	Loss	Loss	2	2	CHRNA5
chr14	645047	690052	45006	BICF2P693197	BICF2S23661618	Loss	Loss	17	2	TRIM11, OBSCN
chr14	853721	1000647	146927	BICF2S2373579	BICF2P427413	Loss	Loss	17	19	WNT3A, LOC111098718, WNT9A, PRSS38
chr15	8373335	8384052	10718	BICF2G630444299	BICF2G630444293	Loss	Loss	2	10	MYLK3
chr16	383954	442252	58299	BICF2S22915646	BICF2S23452372	Loss	Loss	2	5	TNS3
chr17	749155	818590	69436	BICF2S2362493	BICF2S23136090	Loss	Loss	5	2	SNTG2, TPO
chr17	39880141	39905486	25346	BICF2S23210041	TIGRP2P231415_rs8979551	Loss	Loss	3	2
chr18	25644344	25740090	95747	BICF2P1358625	BICF2P14496	Loss	Loss	12	7	HRAS, LRRC56, LMNTD2, RASSF7, MIR210, PHRF1, DEAF1, TMEM80
chr20	53264834	53285579	20746	BICF2G630446911	BICF2G630446823	Loss	Gain	12	2
chr23	52156177	52159756	3580	BICF2S23426173	BICF2S23425789	Loss	Loss	17	5
chr25	48611803	48662322	50520	BICF2P792692	BICF2G630158483	Loss	Loss	11	2	ESPNL, KLHL30, LOC106557794, ERFE
chr25	50314369	50482865	168497	TIGRP2P335336_rs9166663	BICF2G630156146	Loss	Loss	13	7	LOC106557791
chr27	2869179	2886074	16896	BICF2G630138664	BICF2G630138678	Loss	Loss	2	2	KRT80
chr27	25695551	25810881	115331	TIGRP2P351680_rs8666747	BICF2G630150974	Loss	Loss	8	18	LOC609554, LOC106557533, LOC100686184, LOC100686261, LOC486644,
chr28	40299547	40325378	25832	BICF2G630108823	BICF2P319846	Loss	Loss	5	5	LRRC27, LOC102152806
chr28	40715077	40730141	15065	BICF2P1025903	BICF2G63064629	Loss	Loss	5	6	LOC102153476, LOC111092984, ADGRA1
chr28	40993026	41020381	27356	BICF2P111596	BICF2P124519	Loss	Loss	5	13	LOC608349, LOC491694
chr30	39280736	39318243	37508	BICF2S22960447	BICF2G630394300	Loss	Loss	17	7	PSTPIP1
chr36	13649606	13674565	24960	BICF2P634930	BICF2P283049	Loss	Loss	2	9	NOSTRIN
chr36	13722385	13742102	19718	BICF2S23116783	BICF2S23157920	Loss	Gain	2	2	G6PC2
chr37	30065232	30112232	47001	TIGRP2P422608_rs8924214	BICF2P640682	Loss	Loss	3	2	ERICH1
chr38	4831886	4885582	53697	BICF2S2293688	BICF2S23237038	Loss	Loss	3	2
chr38	23537427	23576338	38912	TIGRP2P424718_rs9249342	BICF2G63065716	Loss	Loss	8	11	KIRREL1, LOC111094484, LOC111094485

## Sheet: Genes
Genes symbol	Full name		Function
LOC102154255	uncharacterized	un
CTBP1	C-terminal binding protein 1		PARTICIPATES IN chronic myeloid leukemia pathway; Notch signaling pathway; Wnt signaling pathway; ASSOCIATED WITH Colorectal Neoplasms (ortholog); genetic disease (ortholog); HYPOTONIA, ATAXIA, DEVELOPMENTAL DELAY
SPON2	spondin 2
LOC100682613	pseudo	pseudo
TMED11	glycoprotein 25L
RNF212	ring finger protein 212		NCODES a protein that exhibits metal ion binding (ortholog); SUMO transferase activity (ortholog); INVOLVED IN chiasma assembly (ortholog); meiotic gene conversion (ortholog); protein sumoylation (ortholog); ASSOCIATED WITH breast ductal carcinoma (ortholog); FOUND IN synaptonemal complex (ortholog)
FGFRL1	fibroblast growth factor receptor like 1
IDUA	iduronidase, alpha-L-		ENCODES a protein that exhibits hydrolase activity, hydrolyzing O-glycosyl compounds (ortholog); L-iduronidase activity (ortholog); signaling receptor binding (ortholog); INVOLVED IN carbohydrate metabolic process (ortholog); chondroitin sulfate catabolic process (ortholog); dermatan sulfate catabolic process (ortholog); ASSOCIATED WITH Calcium Oxalate Nephrolithiasis (ortholog); Experimental Liv…
LOC111095326	uncharacterized	un
SLC26A1	solute carrier family 26 member 1		ENCODES a protein that exhibits anion:anion antiporter activity (ortholog); bicarbonate transmembrane transporter activity (ortholog); chloride transmembrane transporter activity (ortholog); INVOLVED IN 3'-phosphoadenosine 5'-phosphosulfate biosynthetic process (ortholog); bicarbonate transport (ortholog); chloride transmembrane transport (ortholog); ASSOCIATED WITH Calcium Oxalate Nephrolithiasi…
GRID1	glutamate ionotropic receptor delta type subunit 1		ENCODES a protein that exhibits glutamate receptor activity (ortholog); ionotropic glutamate receptor activity (ortholog); INVOLVED IN ion transmembrane transport (ortholog); ionotropic glutamate receptor signaling pathway (ortholog); modulation of chemical synaptic transmission (ortholog); ASSOCIATED WITH Colorectal Neoplasms (ortholog); Malformations of Cortical Development, Group II (ortholog)…
LOC100049001	tryptase		ENCODES a protein that exhibits serine-type endopeptidase activity (ortholog); serine-type peptidase activity (ortholog); INVOLVED IN proteolysis (ortholog); ASSOCIATED WITH Keloid (ortholog); schizophrenia (ortholog); FOUND IN collagen-containing extracellular matrix (ortholog); extracellular space (ortholog)
CACNA1H	calcium voltage-gated channel subunit alpha1 H		ENCODES a protein that exhibits ion channel activity (ortholog); low voltage-gated calcium channel activity (ortholog); metal ion binding (ortholog); INVOLVED IN aldosterone biosynthetic process (ortholog); calcium ion import (ortholog); calcium ion transmembrane transport (ortholog); PARTICIPATES IN acebutolol pharmacodynamics pathway; adrenergic beta receptor agonist and beta-blocker pharmacody…
LOC111096331	uncharacterized	ncRNA
LOC106558921	uncharacterized	un
LOC111096332	uncharacterized	ncRNA
LOC490081	tektin-4		INVOLVED IN cilium assembly (ortholog); cilium movement involved in cell motility (ortholog); flagellated sperm motility (ortholog); FOUND IN cytoplasm (ortholog); microtubule (ortholog); nucleus (ortholog)
SSTR5	somatostatin receptor 5		ENCODES a protein that exhibits G protein-coupled receptor activity (ortholog); neuropeptide binding (ortholog); somatostatin receptor activity (ortholog); INVOLVED IN cellular response to glucocorticoid stimulus (ortholog); G protein-coupled receptor signaling pathway (ortholog); G protein-coupled receptor signaling pathway, coupled to cyclic nucleotide second messenger (ortholog); PARTICIPATES …
SOX8	transcription factor SOX-8/SRY-box 8		ENCODES a protein that exhibits DNA binding (ortholog); DNA-binding transcription activator activity, RNA polymerase II-specific (ortholog); DNA-binding transcription factor activity, RNA polymerase II-specific (ortholog); INVOLVED IN adipose tissue development (ortholog); astrocyte fate commitment (ortholog); cell fate commitment (ortholog); ASSOCIATED WITH peripheral nervous system disease (ort…
LOC111096333	uncharacterized	ncRNA
LMF1	lipase maturation factor 1		INVOLVED IN chylomicron remnant clearance (ortholog); ER to Golgi vesicle-mediated transport (ortholog); positive regulation of lipoprotein lipase activity (ortholog); ASSOCIATED WITH Hypertriglyceridemia (ortholog); Lipase Deficiency Combined (ortholog); FOUND IN endoplasmic reticulum membrane (ortholog); Golgi apparatus (ortholog); integral component of membrane (ortholog)
MIR8877	microRNA 8877	ncRNA
LOC111096334	uncharacterized	ncRNA
GNG13	G protein subunit gamma 13		ENCODES a protein that exhibits G-protein beta-subunit binding (ortholog); GTPase activity (ortholog); INVOLVED IN phospholipase C-activating G protein-coupled receptor signaling pathway (ortholog); sensory perception of taste (ortholog); PARTICIPATES IN glutamate signaling pathway; FOUND IN dendrite (ortholog); heterotrimeric G-protein complex (ortholog); plasma membrane (ortholog)
CHTF18	chromosome transmission fidelity factor 18		ENCODES a protein that exhibits ATP binding (ortholog); DNA clamp loader activity (ortholog); single-stranded DNA-dependent ATPase activity (ortholog); INVOLVED IN DNA replication (ortholog); positive regulation of DNA-directed DNA polymerase activity (ortholog); FOUND IN Ctf18 RFC-like complex (ortholog); cytosol (ortholog); membrane (ortholog)
RPUSD1	RNA pseudouridylate synthase domain containing 1		ENCODES a protein that exhibits pseudouridine synthase activity (ortholog); RNA binding (ortholog); INVOLVED IN pseudouridine synthesis (ortholog); ASSOCIATED WITH prostate cancer (ortholog)
MSLNL	mesothelin-like		INVOLVED IN cell-matrix adhesion (ortholog); FOUND IN cell surface (ortholog); integral component of membrane (ortholog)
LOC611363	mesothelin, transcript variant X7		INVOLVED IN cell adhesion (ortholog); cell-matrix adhesion (ortholog); cellular protein metabolic process (ortholog); ASSOCIATED WITH adenocarcinoma (ortholog); Bile Duct Neoplasms (ortholog); cholangiocarcinoma (ortholog); FOUND IN anchored component of membrane (ortholog); cell surface (ortholog); endoplasmic reticulum lumen (ortholog)
LOC111096335	uncharacterized	ncRNA
NARFL	nuclear prelamin A recognition factor like		ENCODES a protein that exhibits 4 iron, 4 sulfur cluster binding (ortholog); metal ion binding (ortholog); INVOLVED IN hematopoietic progenitor cell differentiation (ortholog); iron-sulfur cluster assembly (ortholog); oxygen homeostasis (ortholog); PARTICIPATES IN cytosolic iron-sulfur cluster protein assembly pathway; FOUND IN CIA complex (ortholog)
LOC106558944	uncharacterized	ncRNA
HAGHL	hydroxyacylglutathione hydrolase like		ENCODES a protein that exhibits hydrolase activity (ortholog); hydroxyacylglutathione hydrolase activity (ortholog); metal ion binding (ortholog); INVOLVED IN methylglyoxal catabolic process to D-lactate via S-lactoyl-glutathione (ortholog); PARTICIPATES IN pyruvate metabolic pathway
LOC102155632	AS/WASL-interacting protein family member 3-like
CCDC78	coiled-coil domain containing 78		INVOLVED IN cell projection organization (ortholog); de novo centriole assembly involved in multi-ciliated epithelial cell differentiation (ortholog); skeletal muscle contraction (ortholog); ASSOCIATED WITH centronuclear myopathy (ortholog); Centronuclear Myopathy 4 (ortholog); congenital structural myopathy (ortholog); FOUND IN centriole (ortholog); deuterosome (ortholog); perinuclear region of …
FAM173A	family with sequence similarity 173 member A		ENCODES a protein that exhibits methyltransferase activity (ortholog); INVOLVED IN methylation (ortholog); FOUND IN integral component of membrane (ortholog)
METRN	meteorin, glial cell differentiation regulator		INVOLVED IN glial cell differentiation (ortholog); positive regulation of axonogenesis (ortholog); FOUND IN extracellular space (ortholog)
FBXL16	F-box and leucine rich repeat protein 16		ENCODES a protein that exhibits ubiquitin-protein transferase activity (ortholog); INVOLVED IN post-translational protein modification (ortholog); protein polyubiquitination (ortholog); SCF-dependent proteasomal ubiquitin-dependent protein catabolic process (ortholog); FOUND IN cytosol (ortholog); SCF ubiquitin ligase complex (ortholog)
WDR24	WD repeat domain 24		INVOLVED IN autophagy (ortholog); cellular response to amino acid starvation (ortholog); positive regulation of TOR signaling (ortholog); PARTICIPATES IN mTOR signaling pathway; FOUND IN GATOR2 complex (ortholog); lysosomal membrane (ortholog)
JMJD8	jumonji domain containing 8		INVOLVED IN positive regulation of I-kappaB kinase/NF-kappaB signaling (ortholog); positive regulation of sprouting angiogenesis (ortholog); regulation of glycolytic process (ortholog); ASSOCIATED WITH autosomal recessive spinocerebellar ataxia 16 (ortholog); FOUND IN cytoplasm (ortholog); endoplasmic reticulum (ortholog); endoplasmic reticulum lumen (ortholog)
STUB1	STIP1 homology and U-box containing protein 1		ENCODES a protein that exhibits chaperone binding (ortholog); enzyme binding (ortholog); G protein-coupled receptor binding (ortholog); INVOLVED IN cellular response to heat (ortholog); cellular response to hypoxia (ortholog); cellular response to misfolded protein (ortholog); PARTICIPATES IN Endoplasmic Reticulum-associated degradation pathway; ubiquitin/proteasome degradation pathway; ASSOCIATE…
RHBDL1	rhomboid like 1		ENCODES a protein that exhibits serine-type endopeptidase activity (ortholog); INVOLVED IN proteolysis (ortholog); signal transduction (ortholog); FOUND IN integral component of membrane (ortholog); integral component of plasma membrane (ortholog); membrane (ortholog)
RHOT2	ras homolog family member T2		ENCODES a protein that exhibits calcium ion binding (ortholog); GTP binding (ortholog); GTPase activity (ortholog); INVOLVED IN cellular homeostasis (ortholog); mitochondrial outer membrane permeabilization (ortholog); mitochondrion organization (ortholog); PARTICIPATES IN mitochondria transport pathway; FOUND IN cytosol (ortholog); integral component of mitochondrial outer membrane (ortholog); m…
WDR90	WD repeat domain 90		INVOLVED IN cilium assembly (ortholog); FOUND IN centriole (ortholog)
MCRIP2	MAPK regulated corepressor interacting protein 2
TRNAG-CCC	tRNA-Gly	tRNA
METTL26	methyltransferase like 26
WFIKKN1	WAP, follistatin/kazal, immunoglobulin, kunitz and netrin domain containing 1		ENCODES a protein that exhibits metalloendopeptidase inhibitor activity (ortholog); receptor antagonist activity (ortholog); serine-type endopeptidase inhibitor activity (ortholog); INVOLVED IN extracellular negative regulation of signal transduction (ortholog); muscle fiber development (ortholog); negative regulation of DNA binding (ortholog); FOUND IN extracellular region (ortholog)
RAB40C	RAB40C, member RAS oncogene family		ENCODES a protein that exhibits GDP binding (ortholog); GTP binding (ortholog); GTPase activity (ortholog); INVOLVED IN intracellular protein transport (ortholog); intracellular signal transduction (ortholog); protein ubiquitination (ortholog); FOUND IN Golgi membrane (ortholog); intracellular (ortholog); perinuclear region of cytoplasm (ortholog)
MYBPH	myosin binding protein H		ENCODES a protein that exhibits structural constituent of muscle (ortholog); INVOLVED IN cell adhesion (ortholog); regulation of striated muscle contraction (ortholog); FOUND IN myosin filament (ortholog)
ADORA1	adenosine A1 receptor, transcript variant X1		ENCODES a protein that exhibits G protein-coupled adenosine receptor activity (ortholog); G protein-coupled receptor binding (ortholog); G-protein beta/gamma-subunit complex binding (ortholog); INVOLVED IN activation of MAPKK activity (ortholog); adenosine receptor signaling pathway (ortholog); adenylate cyclase-inhibiting G protein-coupled receptor signaling pathway (ortholog); ASSOCIATED WITH a…
LOC102152802	uncharacterized	ncRNA
LOC106558980	uncharacterized	pseudo
MYOG	myogenin		ENCODES a protein that exhibits chromatin DNA binding (ortholog); DNA-binding transcription activator activity, RNA polymerase II-specific (ortholog); DNA-binding transcription factor activity (ortholog); INVOLVED IN cellular response to estradiol stimulus (ortholog); cellular response to growth factor stimulus (ortholog); cellular response to lithium ion (ortholog); ASSOCIATED WITH Experimental …
PPFIA4	PTPRF interacting protein alpha 4		ASSOCIATED WITH atrial fibrillation (ortholog); FOUND IN cell surface (ortholog); cytosol (ortholog); intracellular (ortholog)
LOC111096576	uncharacterized	ncRNA
TMEM183A	transmembrane protein 183A		ASSOCIATED WITH prostate cancer (ortholog); FOUND IN integral component of membrane (ortholog)
LOC100682872	alpha-1,3-mannosyl-glycoprotein 4-beta-N-acetylglucosaminyltransferase C-like
LOC111096575	uncharacterized	ncRNA
LOC102151417	alpha-1,3-mannosyl-glycoprotein 4-beta-N-acetylglucosaminyltransferase C-like
CYB5R1	NAD(P)H:quinone oxidoreductase type 3		ENCODES a protein that exhibits cytochrome-b5 reductase activity, acting on NAD(P)H (ortholog); FAD binding (ortholog); oxidoreductase activity (ortholog); INVOLVED IN bicarbonate transport (ortholog); oxidation-reduction process (ortholog); platelet degranulation (ortholog); PARTICIPATES IN amino sugar metabolic pathway; nucleotide sugar metabolic pathway; FOUND IN endoplasmic reticulum membrane…
LGR6	leucine rich repeat containing G protein-coupled receptor 6		ENCODES a protein that exhibits protein-hormone receptor activity (ortholog); transmembrane signaling receptor activity (ortholog); INVOLVED IN bone regeneration (ortholog); G protein-coupled receptor signaling pathway (ortholog); positive regulation of canonical Wnt signaling pathway (ortholog); ASSOCIATED WITH Breast Neoplasms (ortholog); Colorectal Neoplasms (ortholog); squamous cell carcinoma…
LOC607201	receptor-type tyrosine-protein phosphatase V-like
PTPN7	protein tyrosine phosphatase, non-receptor type 7		ENCODES a protein that exhibits protein tyrosine phosphatase activity (ortholog); INVOLVED IN cellular response to cytokine stimulus (ortholog); peptidyl-tyrosine dephosphorylation (ortholog); protein dephosphorylation (ortholog); PARTICIPATES IN mitogen activated protein kinase signaling pathway; FOUND IN cytoplasm (ortholog); cytoplasmic side of plasma membrane (ortholog); cytoskeleton (ortholo…
LOC102152928		ncRNA
CD7	CD7 molecule		ENCODES a protein that exhibits signaling receptor activity (ortholog); INVOLVED IN adaptive immune response (ortholog); immune response (ortholog); T cell activation (ortholog); ASSOCIATED WITH Abortion, Spontaneous (ortholog); amyotrophic lateral sclerosis type 1 (ortholog); Experimental Liver Cirrhosis (ortholog); FOUND IN integral component of membrane (ortholog); membrane (ortholog); plasma …
CSNK1D	casein kinase 1 delta		ENCODES a protein that exhibits ATP binding (ortholog); cadherin binding (ortholog); peptide binding (ortholog); INVOLVED IN cellular response to nerve growth factor stimulus (ortholog); ciliary basal body-plasma membrane docking (ortholog); circadian regulation of gene expression (ortholog); PARTICIPATES IN Hedgehog signaling pathway; p53 signaling pathway; ribosome biogenesis pathway; ASSOCIATE…
SLC16A3	solute carrier family 16 member 3		ENCODES a protein that exhibits lactate transmembrane transporter activity (ortholog); monocarboxylic acid transmembrane transporter activity (ortholog); RNA binding (ortholog); INVOLVED IN lactate transmembrane transport (ortholog); leukocyte migration (ortholog); monocarboxylic acid transport (ortholog); ASSOCIATED WITH Smith-Magenis syndrome (ortholog); FOUND IN integral component of plasma me…
CCDC57	coiled-coil domain containing 57		ASSOCIATED WITH Smith-Magenis syndrome (ortholog)
FASN	fatty acid synthase		ENCODES a protein that exhibits 3-hydroxyoctanoyl-[acyl-carrier-protein] dehydratase activity (ortholog); 3-oxo-glutaryl-[acp] methyl ester reductase activity (ortholog); 3-oxo-pimeloyl-[acp] methyl ester reductase activity (ortholog); INVOLVED IN acetyl-CoA metabolic process (ortholog); biosynthetic process (ortholog); cellular response to interleukin-4 (ortholog); PARTICIPATES IN fatty acid bio…
DUS1L	dihydrouridine synthase 1 like		ENCODES a protein that exhibits flavin adenine dinucleotide binding (ortholog); tRNA dihydrouridine synthase activity (ortholog); INVOLVED IN oxidation-reduction process (ortholog); tRNA dihydrouridine synthesis (ortholog); ASSOCIATED WITH Experimental Liver Cirrhosis (ortholog); Smith-Magenis syndrome (ortholog)
GPS1	G protein pathway suppressor 1		ENCODES a protein that exhibits GTPase inhibitor activity (ortholog); INVOLVED IN inactivation of MAPK activity (ortholog); JNK cascade (ortholog); negative regulation of GTPase activity (ortholog); ASSOCIATED WITH Smith-Magenis syndrome (ortholog); FOUND IN COP9 signalosome (ortholog); cytosol (ortholog); nucleoplasm (ortholog)
RFNG	RFNG O-fucosylpeptide 3-beta-N-acetylglucosaminyltransferase		ENCODES a protein that exhibits acetylglucosaminyltransferase activity (ortholog); metal ion binding (ortholog); O-fucosylpeptide 3-beta-N-acetylglucosaminyltransferase activity (ortholog); INVOLVED IN animal organ morphogenesis (ortholog); cell differentiation (ortholog); nervous system development (ortholog); PARTICIPATES IN Notch signaling pathway; O-linked glycan biosynthetic pathway; ASSOCIA…
LOC102154270	uncharacterized	ncRNA
LOC607806	carbonyl reductase [NADPH] 2-like
DCXR	dicarbonyl and L-xylulose reductase		ENCODES a protein that exhibits carbonyl reductase (NADPH) activity (ortholog); identical protein binding (ortholog); L-xylulose reductase (NAD+) activity (ortholog); INVOLVED IN D-xylose metabolic process (ortholog); glucose metabolic process (ortholog); glucuronate catabolic process to xylulose 5-phosphate (ortholog); PARTICIPATES IN pentose and glucuronate interconversion pathway; ASSOCIATED W…
RAC3	Rac family small GTPase 3
LRRC45	leucine rich repeat containing 45		ASSOCIATED WITH Smith-Magenis syndrome (ortholog); FOUND IN centrosome (ortholog); cytosol (ortholog); nucleoplasm (ortholog)
ASPSCR1	ASPSCR1, UBX domain containing tether for SLC2A4		INVOLVED IN glucose homeostasis (ortholog); intracellular protein transport (ortholog); positive regulation of protein modification process (ortholog); ASSOCIATED WITH alveolar soft part sarcoma (ortholog); Smith-Magenis syndrome (ortholog); FOUND IN cytoplasmic side of plasma membrane (ortholog); cytosol (ortholog); endomembrane system (ortholog)
NOTUM	NOTUM, palmitoleoyl-protein carboxylesterase		ENCODES a protein that exhibits hydrolase activity (ortholog); palmitoleyl hydrolase activity (ortholog); phospholipase C activity (ortholog); INVOLVED IN cellular protein metabolic process (ortholog); negative regulation of canonical Wnt signaling pathway (ortholog); negative regulation of Wnt signaling pathway (ortholog); ASSOCIATED WITH Smith-Magenis syndrome (ortholog); FOUND IN endoplasmic r…
FSCN2	fascin actin-bundling protein 2, retinal		ENCODES a protein that exhibits actin binding (ortholog); actin filament binding (ortholog); protein binding, bridging (ortholog); INVOLVED IN actin cytoskeleton organization (ortholog); actin filament bundle assembly (ortholog); anatomical structure morphogenesis (ortholog); ASSOCIATED WITH Leber congenital amaurosis (ortholog); macular degeneration (ortholog); retinitis pigmentosa (ortholog); F…
LOC111097269	uncharacterized	ncRNA
LOC102157223	uncharacterized	ncRNA
ACTG1	actin gamma 1		ENCODES a protein that exhibits ATP binding (ortholog); identical protein binding (ortholog); profilin binding (ortholog); INVOLVED IN cell junction assembly (ortholog); cellular response to interferon-gamma (ortholog); ephrin receptor signaling pathway (ortholog); PARTICIPATES IN arrhythmogenic right ventricular cardiomyopathy pathway; auditory mechanotransduction pathway; dilated cardiomyopathy…
BAHCC1	BAH domain and coiled-coil containing 1		ENCODES a protein that exhibits chromatin binding (ortholog); ASSOCIATED WITH Smith-Magenis syndrome (ortholog)
LOC102151164	uncharacterized	ncRNA
SLC38A10	solute carrier family 38 member 10		ENCODES a protein that exhibits amino acid transmembrane transporter activity (ortholog); INVOLVED IN amino acid transmembrane transport (ortholog); bone development (ortholog); sodium ion transport (ortholog); ASSOCIATED WITH Smith-Magenis syndrome (ortholog); FOUND IN Golgi apparatus (ortholog); integral component of membrane (ortholog)
NDUFAF8	NADH:ubiquinone oxidoreductase complex assembly factor 8		INVOLVED IN mitochondrial respiratory chain complex I assembly (ortholog); ASSOCIATED WITH Smith-Magenis syndrome (ortholog); FOUND IN mitochondrion (ortholog)
TEPSIN	TEPSIN, adaptor related protein complex 4 accessory protein		ASSOCIATED WITH Smith-Magenis syndrome (ortholog); FOUND IN AP-4 adaptor complex (ortholog); coated vesicle membrane (ortholog); cytoplasm (ortholog)
CEP131	centrosomal protein 131		ENCODES a protein that exhibits protein homodimerization activity (ortholog); protein-containing complex binding (ortholog); INVOLVED IN cell differentiation (ortholog); ciliary basal body-plasma membrane docking (ortholog); cilium assembly (ortholog); ASSOCIATED WITH Smith-Magenis syndrome (ortholog); FOUND IN acrosomal vesicle (ortholog); centriolar satellite (ortholog); centrosome (ortholog)
AATK	apoptosis associated tyrosine kinase		ENCODES a protein that exhibits ATP binding (ortholog); protein kinase activity (ortholog); protein serine/threonine kinase activity (ortholog); INVOLVED IN protein phosphorylation (ortholog); ASSOCIATED WITH Smith-Magenis syndrome (ortholog); FOUND IN integral component of membrane (ortholog); perinuclear region of cytoplasm (ortholog)
MIR338	microRNA 338	micro
BAIAP2	BAI1 associated protein 2		ENCODES a protein that exhibits cadherin binding involved in cell-cell adhesion (ortholog); cytoskeletal adaptor activity (ortholog); identical protein binding (ortholog); INVOLVED IN actin crosslink formation (ortholog); actin filament bundle assembly (ortholog); axonogenesis (ortholog); PARTICIPATES IN insulin responsive facilitative sugar transporter mediated glucose transport pathway; platele…
USP32	ubiquitin specific peptidase 32		ENCODES a protein that exhibits calcium ion binding (ortholog); thiol-dependent ubiquitin-specific protease activity (ortholog); INVOLVED IN protein deubiquitination (ortholog); proteolysis (ortholog); ubiquitin-dependent protein catabolic process (ortholog); ASSOCIATED WITH Smith-Magenis syndrome (ortholog); FOUND IN cytosol (ortholog); Golgi apparatus (ortholog); membrane (ortholog)
LOC111097513		pseudo
CA4	carbonic anhydrase 4		ENCODES a protein that exhibits carbonate dehydratase activity (ortholog); zinc ion binding (ortholog); INVOLVED IN bicarbonate transport (ortholog); ASSOCIATED WITH Colonic Neoplasms (ortholog); retinitis pigmentosa (ortholog); retinitis pigmentosa 17 (ortholog); FOUND IN anchored component of external side of plasma membrane (ortholog); anchored component of membrane (ortholog); apical plasma m…
TRNAK-CUU	tRNA-Lys	tRNA
DENND6B	DENN domain containing 6B		ENCODES a protein that exhibits Rab guanyl-nucleotide exchange factor activity (ortholog); ASSOCIATED WITH autism spectrum disorder (ortholog); FOUND IN cytosol (ortholog); recycling endosome (ortholog)
PLXNB2	plexin B2		ENCODES a protein that exhibits semaphorin receptor activity (ortholog); INVOLVED IN brain development (ortholog); homophilic cell adhesion via plasma membrane adhesion molecules (ortholog); negative regulation of cell adhesion (ortholog); ASSOCIATED WITH autism spectrum disorder (ortholog); FOUND IN cell surface (ortholog); extracellular exosome (ortholog); integral component of plasma membrane …
MAPK11	mitogen-activated protein kinase 11		ENCODES a protein that exhibits ATP binding (ortholog); MAP kinase activity (ortholog); protein kinase activity (ortholog); INVOLVED IN activation of MAPK activity (ortholog); cellular response to interleukin-1 (ortholog); cellular response to organic substance (ortholog); PARTICIPATES IN adenosine signaling pathway; amyotrophic lateral sclerosis pathway; Chagas disease pathway; ASSOCIATED WITH a…
MAPK12	mitogen-activated protein kinase 12		ENCODES a protein that exhibits ATP binding (ortholog); magnesium ion binding (ortholog); MAP kinase activity (ortholog); INVOLVED IN cell cycle arrest (ortholog); cellular response to organic substance (ortholog); DNA damage induced protein phosphorylation (ortholog); PARTICIPATES IN amyotrophic lateral sclerosis pathway; Chagas disease pathway; gonadotropin-releasing hormone signaling pathway; …
HDAC10	histone deacetylase 10		ENCODES a protein that exhibits enzyme binding (ortholog); histone deacetylase activity (ortholog); histone deacetylase binding (ortholog); INVOLVED IN chromatin organization (ortholog); histone deacetylation (ortholog); histone H3 deacetylation (ortholog); PARTICIPATES IN histone modification pathway; ASSOCIATED WITH autism spectrum disorder (ortholog); FOUND IN cytoplasm (ortholog); histone dea…
TUBGCP6	tubulin gamma complex associated protein 6		ENCODES a protein that exhibits gamma-tubulin binding (ortholog); microtubule binding (ortholog); microtubule minus-end binding (ortholog); INVOLVED IN cytoplasmic microtubule organization (ortholog); meiotic cell cycle (ortholog); microtubule nucleation (ortholog); ASSOCIATED WITH autism spectrum disorder (ortholog); genetic disease (ortholog); microcephaly and chorioretinopathy 1 (ortholog); FO…
LOC111097612	gamma-tubulin complex component 6-like
SELENOO	selenoprotein O		ASSOCIATED WITH autism spectrum disorder (ortholog); FOUND IN mitochondrion (ortholog)
LOC607055	angiopoietin-related protein 5-like
TRABD	TraB domain containing		ASSOCIATED WITH autism spectrum disorder (ortholog)
PANX2	pannexin 2		ENCODES a protein that exhibits channel activity (ortholog); gap junction hemi-channel activity (ortholog); INVOLVED IN cation transport (ortholog); cell-cell signaling (ortholog); positive regulation of interleukin-1 secretion (ortholog); ASSOCIATED WITH autism spectrum disorder (ortholog); FOUND IN cytoplasm (ortholog); gap junction (ortholog); integral component of membrane (ortholog)
TTLL8	tubulin tyrosine ligase like 8		ENCODES a protein that exhibits ATP binding (ortholog); protein-glycine ligase activity (ortholog); protein-glycine ligase activity, initiating (ortholog); INVOLVED IN cilium assembly (ortholog); protein polyglycylation (ortholog); ASSOCIATED WITH autism spectrum disorder (ortholog); FOUND IN axoneme (ortholog); cilium (ortholog); cytosol (ortholog)
IL17REL	interleukin 17 receptor E like		ENCODES a protein that exhibits interleukin-17 receptor activity (ortholog); INVOLVED IN cytokine-mediated signaling pathway (ortholog); ASSOCIATED WITH autism spectrum disorder (ortholog); ulcerative colitis (ortholog)
LOC111097613	uncharacterized	ncRNA
PIM3	Pim-3 proto-oncogene, serine/threonine kinase
FAM19A5	family with sequence similarity 19 member A5, C-C motif chemokine like		ASSOCIATED WITH autism spectrum disorder (ortholog); FOUND IN extracellular region (ortholog); integral component of membrane (ortholog)
LOC111098413	uncharacterized	un
LOC111098414	uncharacterized	ncRNA
DLL1	delta like canonical Notch ligand 1		ENCODES a protein that exhibits calcium ion binding (ortholog); Notch binding (ortholog); scaffold protein binding (ortholog); INVOLVED IN astrocyte development (ortholog); cell differentiation (ortholog); cell fate determination (ortholog); PARTICIPATES IN altered Notch signaling pathway; Notch signaling pathway; ASSOCIATED WITH Brain Neoplasms (ortholog); Breast Neoplasms (ortholog); Chronic Pa…
TBP	TATA-box binding protein		ENCODES a protein that exhibits aryl hydrocarbon receptor binding (ortholog); core promoter binding (ortholog); DNA binding (ortholog); INVOLVED IN DNA-templated transcription, initiation (ortholog); positive regulation of gene expression, epigenetic (ortholog); positive regulation of transcription, DNA-templated (ortholog); PARTICIPATES IN cisplatin drug pathway; Huntington's disease pathway; RN…
PDCD2	programmed cell death 2		ENCODES a protein that exhibits DNA binding (ortholog); enzyme binding (ortholog); metal ion binding (ortholog); INVOLVED IN activation of cysteine-type endopeptidase activity involved in apoptotic process (ortholog); apoptotic process (ortholog); positive regulation of apoptotic process (ortholog); FOUND IN cytoplasm (ortholog); extracellular exosome (ortholog); nucleus (ortholog)
CHRNA5	cholinergic receptor nicotinic alpha 5 subunit		ENCODES a protein that exhibits acetylcholine binding (ortholog); acetylcholine receptor activity (ortholog); acetylcholine-gated cation-selective channel activity (ortholog); INVOLVED IN behavioral response to nicotine (ortholog); chemical synaptic transmission (ortholog); excitatory postsynaptic potential (ortholog); PARTICIPATES IN acetylcholine signaling pathway via nicotinic acetylcholine re…
TRIM11	tripartite motif containing 11		ENCODES a protein that exhibits protein domain specific binding (ortholog); transcription factor binding (ortholog); ubiquitin protein ligase activity (ortholog); INVOLVED IN defense response to virus (ortholog); innate immune response (ortholog); negative regulation of neurogenesis (ortholog); FOUND IN cytoplasm (ortholog); cytosol (ortholog); nucleus (ortholog)
OBSCN	obscurin, cytoskeletal calmodulin and titin-interacting RhoGEF		ENCODES a protein that exhibits ankyrin binding (ortholog); ATP binding (ortholog); calmodulin binding (ortholog); INVOLVED IN G protein-coupled receptor signaling pathway (ortholog); multicellular organism development (ortholog); positive regulation of apoptotic process (ortholog); ASSOCIATED WITH dilated cardiomyopathy (ortholog); genetic disease (ortholog); FOUND IN cytosol (ortholog); M band …
WNT3A	Wnt family member 3A		ENCODES a protein that exhibits co-receptor binding (ortholog); frizzled binding (ortholog); protein domain specific binding (ortholog); INVOLVED IN axis elongation involved in somitogenesis (ortholog); axon guidance (ortholog); beta-catenin destruction complex disassembly (ortholog); PARTICIPATES IN basal cell carcinoma pathway; Hedgehog signaling pathway; Wnt signaling pathway; ASSOCIATED WITH …
LOC111098718	uncharacterized	ncRNA
WNT9A	Wnt family member 9A		ENCODES a protein that exhibits frizzled binding (ortholog); receptor ligand activity (ortholog); INVOLVED IN canonical Wnt signaling pathway (ortholog); cell fate commitment (ortholog); cell-cell signaling (ortholog); PARTICIPATES IN altered Wnt signaling, canonical pathway; basal cell carcinoma pathway; Hedgehog signaling pathway; ASSOCIATED WITH Breast Neoplasms (ortholog); pancreatic cancer (…
PRSS38	protease, serine 38		ENCODES a protein that exhibits serine-type endopeptidase activity (ortholog); INVOLVED IN proteolysis (ortholog); FOUND IN extracellular region (ortholog)
MYLK3	myosin light chain kinase 3		ENCODES a protein that exhibits ATP binding (ortholog); calmodulin-dependent protein kinase activity (ortholog); myosin light chain kinase activity (ortholog); INVOLVED IN cardiac myofibril assembly (ortholog); cellular response to interleukin-1 (ortholog); positive regulation of sarcomere organization (ortholog); FOUND IN actin cytoskeleton (ortholog); cytoplasm (ortholog); cytosol (ortholog)
TNS3	tensin 3		INVOLVED IN cell migration (ortholog); intracellular signal transduction (ortholog); lung alveolus development (ortholog); ASSOCIATED WITH pleomorphic xanthoastrocytoma (ortholog); FOUND IN cytosol (ortholog); focal adhesion (ortholog); intracellular (ortholog)
SNTG2	syntrophin gamma 2		ENCODES a protein that exhibits actin binding (ortholog); neuroligin family protein binding (ortholog); PDZ domain binding (ortholog); INVOLVED IN central nervous system development (ortholog); ASSOCIATED WITH autism spectrum disorder (ortholog); autistic disorder (ortholog); FOUND IN cytoplasm (ortholog); cytoskeleton (ortholog); dystrophin-associated glycoprotein complex (ortholog)
TPO	thyroid peroxidase		ENCODES a protein that exhibits calcium ion binding (ortholog); heme binding (ortholog); iodide peroxidase activity (ortholog); INVOLVED IN cellular oxidant detoxification (ortholog); embryonic hemopoiesis (ortholog); hormone biosynthetic process (ortholog); PARTICIPATES IN autoimmune thyroiditis pathway; Jak-Stat signaling pathway; thyroid hormone biosynthetic pathway; ASSOCIATED WITH Autoimmune…
HRAS	HRas proto-oncogene, GTPase		ENCODES a protein that exhibits GDP binding (ortholog); GTP binding (ortholog); GTPase activity (ortholog); INVOLVED IN animal organ morphogenesis (ortholog); cell cycle arrest (ortholog); cell proliferation (ortholog); PARTICIPATES IN acute myeloid leukemia pathway; adenosine signaling pathway; B cell receptor signaling pathway; ASSOCIATED WITH acute myeloid leukemia (ortholog); adenoid cystic c…
LRRC56	leucine rich repeat containing 56		ASSOCIATED WITH acute myeloid leukemia (ortholog); adenoid cystic carcinoma (ortholog); autosomal recessive Alport syndrome (ortholog)
LMNTD2	lamin tail domain containing 2
RASSF7	Ras association domain family member 7		INVOLVED IN apoptotic process (ortholog); regulation of microtubule cytoskeleton organization (ortholog); signal transduction (ortholog); FOUND IN cytoplasm (ortholog); microtubule organizing center (ortholog)
MIR210	microRNA 210
PHRF1	PHD and ring finger domains 1		ENCODES a protein that exhibits metal ion binding (ortholog); protein domain specific binding (ortholog); RNA polymerase binding (ortholog); INVOLVED IN mRNA processing (ortholog); transcription by RNA polymerase II (ortholog); ASSOCIATED WITH systemic lupus erythematosus (ortholog); FOUND IN membrane (ortholog)
DEAF1	DEAF1, transcription factor		ENCODES a protein that exhibits DNA binding (ortholog); DNA-binding transcription factor activity (ortholog); DNA-binding transcription factor activity, RNA polymerase II-specific (ortholog); INVOLVED IN anatomical structure morphogenesis (ortholog); behavioral fear response (ortholog); embryonic skeletal system development (ortholog); ASSOCIATED WITH attention deficit hyperactivity disorder (ort…
TMEM80	transmembrane protein 80		INVOLVED IN non-motile cilium assembly (ortholog); FOUND IN ciliary transition zone (ortholog); integral component of membrane (ortholog)
ESPNL	espin like		ENCODES a protein that exhibits actin filament binding (ortholog); INVOLVED IN actin filament bundle assembly (ortholog); sensory perception of sound (ortholog); FOUND IN cytoplasm (ortholog); filamentous actin (ortholog); stereocilium tip (ortholog)
KLHL30	kelch like family member 30
LOC106557794	uncharacterized	ncRNA
ERFE	erythroferrone		ENCODES a protein that exhibits hormone activity (ortholog); protein homodimerization activity (ortholog); INVOLVED IN cellular iron ion homeostasis (ortholog); positive regulation of fatty acid transport (ortholog); regulation of fatty acid metabolic process (ortholog); FOUND IN cell (ortholog); extracellular region (ortholog); extracellular space (ortholog)
LOC106557791	collagen alpha-1(I) chain-like
KRT80	keratin 80		ENCODES a protein that exhibits structural molecule activity (ortholog); INVOLVED IN cornification (ortholog); keratinization (ortholog); FOUND IN cytoplasm (ortholog); cytosol (ortholog); intermediate filament (ortholog)
LOC609554		pseudo
LOC106557533	fatty acid-binding protein, epidermal
LOC100686184		pseudo
LOC100686261		pseudo
LOC486644		pseudo
LOC102153476	uncharacterized	ncRNA
LOC111092984	uncharacterized	un
ADGRA1	adhesion G protein-coupled receptor A1		ENCODES a protein that exhibits G protein-coupled receptor activity (ortholog); INVOLVED IN cell surface receptor signaling pathway (ortholog); G protein-coupled receptor signaling pathway (ortholog); signal transduction (ortholog); FOUND IN glutamatergic synapse (ortholog); integral component of membrane (ortholog); postsynaptic density (ortholog)
LOC608349	olfactory receptor 226
LOC491694	scavenger receptor cysteine-rich domain-containing protein SCART1-like
PSTPIP1	proline-serine-threonine phosphatase interacting protein 1		ENCODES a protein that exhibits actin filament binding (ortholog); cytoskeletal protein binding (ortholog); identical protein binding (ortholog); INVOLVED IN actin filament polymerization (ortholog); cell adhesion (ortholog); endocytosis (ortholog); PARTICIPATES IN NOD-like receptor signaling pathway; ASSOCIATED WITH Behcet's disease (ortholog); Experimental Liver Cirrhosis (ortholog); Pyogenic A…
NOSTRIN	nitric oxide synthase trafficking		ENCODES a protein that exhibits DNA binding (ortholog); INVOLVED IN endocytosis (ortholog); negative regulation of transcription, DNA-templated (ortholog); regulation of nitric-oxide synthase activity (ortholog); ASSOCIATED WITH Stroke (ortholog); FOUND IN cytoskeleton (ortholog); endocytic vesicle membrane (ortholog); nuclear speck (ortholog)
G6PC2	glucose-6-phosphatase catalytic subunit 2		ENCODES a protein that exhibits glucose-6-phosphatase activity (ortholog); INVOLVED IN dephosphorylation (ortholog); gluconeogenesis (ortholog); glucose 6-phosphate metabolic process (ortholog); PARTICIPATES IN galactose metabolic pathway; gluconeogenesis pathway; glycolysis pathway; ASSOCIATED WITH type 1 diabetes mellitus (ortholog); FOUND IN endoplasmic reticulum membrane (ortholog); integral …
ERICH1	glutamate rich 1
KIRREL1	kirre like nephrin family adhesion molecule 1		ENCODES a protein that exhibits myosin binding (ortholog); INVOLVED IN cell-cell adhesion (ortholog); excretion (ortholog); negative regulation of protein phosphorylation (ortholog); FOUND IN cell projection membrane (ortholog); cell-cell junction (ortholog); dendritic shaft (ortholog)
LOC111094484		un
LOC111094485	uncharacterized	ncRNA
